# Supplementary material for: Species, Habitats, Society: An Evaluation of Research Supporting EU's Natura 2000 Network
Source: PLoS One. 2014 Nov 21;9(11):e113648. doi: 10.1371/journal.pone.0113648 (PMC4240592; doi:10.1371/journal.pone.0113648)
Supplement: Data S2 — Raw data used to conduct analyses (MS Excel file). (XLS) [file pone.0113648.s007.xls]

## Sheet: Studies_types_outcome
Id	DOI_WOS	Authors	Year_published	Title	Journal	Study_type	Study_scale	Countries_analysed	Opinion
1	10.1016/j.biocon.2011.03.027	C. Cianfrani, G. Le Lay, L. Maiorano, H. F. Satizabal, A. Loy and A. Guisan	2011	Adapting global conservation strategies to climate change at the European scale: The otter as a flagship species	Biological Conservation	ecological	European	EUGeo	positive
2	10.1016/j.landusepol.2010.04.005	R. K. A. Morris	2011	The application of the Habitats Directive in the UK: Compliance or gold plating?	Land Use Policy	social and policies	national	UK	positive
3	10.1016/j.eiar.2009.01.001	R. Therivel	2009	Appropriate assessment of plans in England	Environmental Impact Assessment Review	social and policies	national	UK	negative
4	WOS:000257896700007	A. S. Kallimanis, M. A. Tsiafouli, J. D. Pantis, A. D. Mazaris, Y. Matsinos and S. P. Sgardelis	2008	Arable land and habitat diversity in Natura 2000 sites in Greece	Journal of Biological Research-Thessaloniki	ecological	national	GR	positive
5	10.1016/j.biocon.2006.08.003	I. Martinez, F. Carreno, A. Escudero and A. Rubio	2006	Are threatened lichen species well-protected in Spain? Effectiveness of a protected areas network	Biological Conservation	ecological	national	ES	positive
6	10.3197/096327197776679068	C. Miller	1997	Attributing 'priority' to habitats	Environmental Values	social and policies	national	UK	positive
7	10.1016/j.jnc.2011.09.001	L. Jones-Walters and A. Cil	2011	Biodiversity and stakeholder participation	Journal for Nature Conservation	social and policies	European	EU27	positive
8	10.1016/j.biocon.2009.04.022	F. de Bello, S. Lavorel, P. Gerhold, U. Reier and M. Partel	2010	A biodiversity monitoring framework for practical conservation of grasslands and shrublands	Biological Conservation	ecological	European	EU27	negative
9	10.1016/j.jnc.2011.02.001	G. Louette, D. Adriaens, P. Adriaens, A. Anselin, K. Devos, K. Sannen, W. Van Landuyt, D. Paelinckx and M. Hoffmann	2011	Bridging the gap between the Natura 2000 regional conservation status and local conservation objectives	Journal for Nature Conservation	social and policies	regional	BE	negative
10	10.1016/j.biocon.2007.05.021	V. Devictor, L. Godet, R. Julliard, D. Couvet and F. Jiguet	2007	Can common species benefit from protected areas?	Biological Conservation	ecological	national	FR	positive
11	10.1093/icesjms/fsl037	E. McLaughlin, A. Portig and M. P. Johnson	2007	Can traditional harvesting methods for cockles be accommodated in a Special Area of Conservation?	Ices Journal of Marine Science	ecological	regional	UK	no opinion
12	10.1007/s10531-009-9743-y	J. R. Haslett, P. M. Berry, G. Bela, R. H. G. Jongman, G. Pataki, M. J. Samways and M. Zobel	2010	Changing conservation strategies in Europe: a framework integrating ecosystem services and dynamics	Biodiversity and Conservation	social and policies	European	EU27	negative
13	10.1007/s10750-005-1128-y	W. Langston, B. Chesman, G. Burt, M. Taylor, R. Covey, N. Cunningham, P. Jonas and S. Hawkins	2006	Characterisation of the European Marine Sites in South West England: the Fal and Helford candidate Special Area of Conservation (cSAC)	Hydrobiologia	ecological	national	UK	negative
14	10.1002/aqc.827	M. P. Johnson, T. P. Crowe, R. McAllen and A. L. Allcock	2008	Characterizing the marine Natura 2000 network for the Atlantic region	Aquatic Conservation-Marine and Freshwater Ecosystems	ecological	multinational	PT, ES, UK, FR, BE, NL, DE, DK, SE	no opinion
15	10.1111/j.1461-0248.2011.01610.x	M. B. Araujo, D. Alagador, M. Cabeza, D. Nogues-Bravo and W. Thuiller	2011	Climate change threatens European conservation areas	Ecology Letters	ecological	European	EUGeo	negative
16	10.1111/1475-4959.00004	M. Lee	2001	Coastal defence and the Habitats Directive: predictions of habitat change in England and Wales	Geographical Journal	social and policies	national	UK	no opinion
17	10.1007/s10661-011-1931-z	E. De Luca, C. Novelli, F. Barbato, P. Menegoni, M. Iannetta and G. Nascetti	2011	Coastal dune systems and disturbance factors: monitoring and analysis in central Italy	Environmental Monitoring and Assessment	ecological	regional	IT	negative
18	10.1111/j.1654-1103.2011.01266.x	T. Bittner, A. Jaeschke, B. Reineking and C. Beierkuhnlein	2011	Comparing modelling approaches at two levels of biological organisation - Climate change impacts on selected Natura 2000 habitats	Journal of Vegetation Science	ecological	European	EU25	no opinion
19	10.1016/j.biocon.2008.10.021	E. Apostolopoulou and J. D. Pantis	2009	Conceptual gaps in the national strategy for the implementation of the European Natura 2000 conservation policy in Greece	Biological Conservation	social and policies	national	GR	negative
20	10.1016/j.scitotenv.2008.09.052	J. A. Macedo-Sousa, A. Soares and J. V. Tarazona	2009	A conceptual model for assessing risks in a Mediterranean Natura 2000 Network site	Science of the Total Environment	ecological	multinational	ES, PT	negative
21	10.1007/s10841-010-9283-5	G. M. Carpaneto, A. Mazziotta, G. Coletti, L. Luiselli and P. Audisio	2010	Conflict between insect conservation and public safety: the case study of a saproxylic beetle (Osmoderma eremita) in urban parks	Journal of Insect Conservation	social and policies	regional	IT	positive
22	10.1016/j.biocon.2012.04.031	O. Opermanis, B. MacSharry, A. Aunins and Z. Sipkova	2012	Connectedness and connectivity of the Natura 2000 network of protected areas across country borders in the European Union	Biological Conservation	ecological	European	EU27	negative
23	10.1111/j.1523-1739.2009.01283.x	A. S. Pullin, A. Baldi, O. E. Can, M. Dieterich, V. Kati, B. Livoreil, G. Lovei, B. Mihok, O. Nevin, N. Selva and I. Sousa-Pinto	2009	Conservation Focus on Europe: Major Conservation Policy Issues That Need to Be Informed by Conservation Science	Conservation Biology	social and policies	European	EU27	positive
24	WOS:000166518700002	A. E. Brown	2000	Conservation objectives and targets for freshwater sites	Journal of the Chartered Institution of Water and Environmental Management	ecological	national	UK	no opinion
25	10.1080/08941920.2011.606459	P. Castro, C. Mouro and R. Gouveia	2012	The Conservation of Biodiversity in Protected Areas: Comparing the Presentation of Legal Innovations in the National and the Regional Press	Society & Natural Resources	social and policies	national	PT	no opinion
26	10.3161/000164511x589857	P. Tryjanowski, T. Hartel, A. Baldi, P. Szymanski, M. Tobolka, I. Herzon, A. Golawski, M. Konvicka, M. Hromada, L. Jerzak, K. Kujawa, M. Lenda, G. Orlowski, M. Panek, P. Skorka, T. H. Sparks, S. Tworek, A. Wuczynski and M. Zmihorski	2011	Conservation of farmland birds faces different challenges in Western and Central-Eastern Europe	Acta Ornithologica	ecological	multinational	CZ, HU, LT, PL, RO, SK	negative
27	10.1016/j.biocon.2011.07.001	E. de la Montana, J. M. R. Benayas, A. Vasques, I. Razola and L. Cayuela	2011	Conservation planning of vertebrate diversity in a Mediterranean agricultural-dominant landscape	Biological Conservation	ecological	regional	ES	mixed
28	10.1007/s10531-009-9609-3	L. Bragazza	2009	Conservation priority of Italian Alpine habitats: a floristic approach based on potential distribution of vascular plant species	Biodiversity and Conservation	ecological	national	IT	negative
29	WOS:000293723200002	L. Kutnar, D. Matijasic and R. Pisek	2011	Conservation status and potential threats to Natura 2000 forest habitats in Slovenia	Sumarski List	ecological	national	SI	positive
30	10.1016/j.jrurstud.2011.09.002	S. Bryan	2012	Contested boundaries, contested places: The Natura 2000 network in Ireland	Journal of Rural Studies	social and policies	national	IE	negative
31	10.1017/S0376892912000355	J. Knorn, T. Kuemmerle, V. C. Radeloff, W. S. Keeton, V. Gancz, I. A. Biris, M. Svoboda, P. Griffiths, A. Hagatis and P. Hostert	2013	Continued loss of temperate old-growth forests in the Romanian Carpathians despite an increasing protected area network	Environmental Conservation	ecological	regional	RO	negative
32	10.1111/j.1523-1739.2007.00831.x	L. Maiorano, A. Falcucci, E. O. Garton and L. Boitani	2007	Contribution of the Natura 2000 network to biodiversity conservation in Italy	Conservation Biology	ecological	national	IT	negative
33	10.1002/eet.380	R. Barberán, P. Egea and L. P. Pérez	2005	The cost of Natura 2000 in Spain	European Environment	social and policies	national	ES	no opinion
34	10.1007/s10531-010-9825-x	F. Watzold, M. Mewes, R. van Apeldoorn, R. Varjopuro, T. J. Chmielewski, F. Veeneklaas and M. L. Kosola	2010	Cost-effectiveness of managing Natura 2000 sites: an exploratory study for Finland, Germany, the Netherlands and Poland	Biodiversity and Conservation	ecological	multinational	FI, DE, NL, PL	negative
35	10.1002/aqc.2273	S. Giakoumi, S. Katsanevakis, V. Vassilopoulou, P. Panayotidis, S. Kavadas, Y. Issaris, A. Kokkali, A. Frantzis, A. Panou and G. Mavrommati	2012	Could European marine conservation policy benefit from systematic conservation planning?	Aquatic Conservation-Marine and Freshwater Ecosystems	ecological	regional	GR	mixed
36	10.1111/j.1752-4598.2011.00175.x	O. L. Hernandez-Manrique, C. Numa, J. R. Verdu, E. Galante and J. M. Lobo	2012	Current protected sites do not allow the representation of endangered invertebrates: the Spanish case	Insect Conservation and Diversity	ecological	national	ES	negative
37	10.1016/j.biocon.2010.11.006	S. Giakoumi, H. S. Grantham, G. D. Kokkoris and H. P. Possingham	2011	Designing a network of marine reserves in the Mediterranean Sea with limited socio-economic data	Biological Conservation	ecological	regional	GR	negative
38	10.1016/j.ecolecon.2009.12.006	I. Petrosillo, T. Semeraro and G. Zurlini	2010	Detecting the 'conservation effect' on the maintenance of natural capital flow in different natural parks	Ecological Economics	social and policies	regional	IT	negative
39	10.2478/s13533-012-0120-0	M. Klauco, B. Gregorova, U. Stankov, V. Markovic and P. Lemenkova	2013	Determination of ecological significance based on geostatistical assessment: a case study from the Slovak Natura 2000 protected area	Central European Journal of Geosciences	ecological	regional	SK	positive
40	10.1007/s10531-008-9439-8	D. Schmeller, B. Gruber, B. Bauch, K. Lanno, E. Budrys, V. Babij, R. Juskaitis, M. Sammul, Z. Varga and K. Henle	2008	Determination of national conservation responsibilities for species conservation in regions with multiple political jurisdictions	Biodiversity and Conservation	ecological	European	EU25	no opinion
41	10.1007/s12224-012-9130-4	P. Trigas, S. Tsiftsis, I. Tsiripidis and G. Iatrou	2012	Distribution patterns and conservation perspectives of the endemic flora of Peloponnese (Greece)	Folia Geobotanica	ecological	regional	GR	negative
42	10.1016/j.biocon.2012.08.018	J. C. Young, A. Jordan, K. R. Searle, A. Butler, D. S. Chapman, P. Simmons and A. D. Watt	2013	Does stakeholder involvement really benefit biodiversity conservation?	Biological Conservation	social and policies	regional	UK	negative
43	10.1111/j.1365-2664.2010.01892.x	G. Sundblad, U. Bergstrom and A. Sandstrom	2011	Ecological coherence of marine protected area networks: a spatial assessment using species distribution models	Journal of Applied Ecology	ecological	multinational	SE, FI	mixed
44	10.1111/j.1523-1739.2007.00828.x	L. Boitani, A. Falcucci, L. Maiorano and C. Rondinini	2007	Ecological networks as conceptual frameworks or operational tools in conservation	Conservation Biology	ecological	European	EUGeo	positive
45	10.1007/s10750-007-9225-8	R. Cereghino, J. Biggs, B. Oertli and S. Declerck	2008	The ecology of European ponds: defining the characteristics of a neglected freshwater habitat	Hydrobiologia	ecological	European	EUGeo	no opinion
46	10.1007/s10661-007-9851-7	M. L. Carranza, A. T. R. Acosta, A. Stanisci, G. Pirone and G. Ciaschetti	2008	Ecosystem classification for EU habitat distribution assessment in sandy coastal environments: An application in central Italy	Environmental Monitoring and Assessment	ecological	national	IT	positive
47	10.1111/j.1523-1739.2007.00827.x	M. B. Araujo, J. M. Lobo and J. C. Moreno	2007	The effectiveness of Iberian protected areas in conserving terrestrial biodiversity	Conservation Biology	ecological	national	ES	positive
48	10.1002/aqc.778	P. Abellan, D. Sanchez-Fernandez, J. Velasco and A. Millan	2007	Effectiveness of protected area networks in representing freshwater biodiversity: the case of a Mediterranean river basin (south-eastern Spain)	Aquatic Conservation-Marine and Freshwater Ecosystems	ecological	regional	ES	negative
50	10.1016/j.landusepol.2012.05.006	F. Mallard and D. Francois	2013	Effectiveness of the legal framework for natural areas protection relative to French road projects	Land Use Policy	social and policies	national	FR	negative
51	10.1016/j.biocon.2010.06.013	C. I. Ioja, M. Patroescu, L. Rozylowicz, V. D. Popescu, M. Verghelet, M. L. Zotta and M. Felciuc	2010	The efficacy of Romania's protected areas network in conserving biodiversity	Biological Conservation	ecological	national	RO	negative
52	10.1007/s00267-011-9640-5	M. D. Abellan, J. E. Martinez, J. A. Palazon, M. A. Esteve and J. F. Calvo	2011	Efficiency of a Protected-Area Network in a Mediterranean Region: A Multispecies Assessment with Raptors	Environmental Management	ecological	regional	ES	mixed
53	10.1007/s10531-010-9777-1	D. Cogalniceanu and G. C. Cogalniceanu	2010	An enlarged European Union challenges priority settings in conservation	Biodiversity and Conservation	social and policies	European	EU27	positive
54	10.1002/aqc.968	I. G. Cowx, J. P. Harvey, R. A. Noble and A. D. Nunn	2009	Establishing survey and monitoring protocols for the assessment of conservation status of fish populations in river Special Areas of Conservation in the UK	Aquatic Conservation-Marine and Freshwater Ecosystems	ecological	national	UK	positive
55	10.1016/j.biocon.2011.03.010	D. Guthlin, F. Knauer, T. Kneib, H. Kuchenhoff, P. Kaczensky, G. Rauer, M. Jonozovic, A. Mustoni and K. Jerina	2011	Estimating habitat suitability and potential population size for brown bears in the Eastern Alps	Biological Conservation	ecological	multinational	IT, AT, SI	negative
56	WOS:000079274000018	G. Beaufoy	1998	The EU Habitats Directive in Spain: can it contribute effectively to the conservation of extensive agroecosystems?	Journal of Applied Ecology	social and policies	national	ES	positive
57	10.1007/s10531-011-0037-9	S. Feola, M. L. Carranza, J. H. J. Schaminee, J. A. M. Janssen and A. T. R. Acosta	2011	EU habitats of interest: an insight into Atlantic and Mediterranean beach and foredunes	Biodiversity and Conservation	ecological	multinational	NL, IT	mixed
58	10.1016/j.biocon.2012.10.012	F. S. Albuquerque, M. J. T. Assunção-Albuquerque, L. Cayuela, R. Zamora and B. M. Benito	2013	European Bird distribution is “well” represented by Special Protected Areas: Mission accomplished?	Biological Conservation	ecological	European	EU27	negative
59	10.1093/jel/eqn028	L. Kramer	2009	The European Commission's Opinions underArticle 6(4) of the Habitats Directive	Journal of Environmental Law	social and policies	European	EU27	negative
60	10.1016/j.jnc.2012.11.006	L. Jones-Walters and K. Civic	2013	European protected areas: Past, present and future	Journal for Nature Conservation	ecological	European	EU27	positive
61	10.1016/s0169-2046(02)00106-8	J. Hiedanpaa	2002	European-wide conservation versus local well-being: the reception of the Natura 2000 Reserve Network in Karvia, SW-Finland	Landscape and Urban Planning	social and policies	regional	FI	negative
62	10.1007/s00267-010-9583-2	M. Grodzinska-Jurczak and J. Cent	2011	Expansion of Nature Conservation Areas: Problems with Natura 2000 Implementation in Poland?	Environmental Management	social and policies	national	PL	negative
63	10.1016/j.jnc.2012.05.005	A. Pietrzyk-Kaszynska, J. Cent, M. Grodzinska-Jurczak and M. Szymanska	2012	Factors influencing perception of protected areas-The case of Natura 2000 in Polish Carpathian communities	Journal for Nature Conservation	social and policies	regional	PL	negative
64	10.1007/s00267-010-9601-4	C. Tattoni, M. Ciolli and F. Ferretti	2011	The fate of priority areas for conservation in protected areas: A fine-scale Markov chain approach	Environmental Management	social and policies	regional	IT	no opinion
65	10.1017/s0376892906003146	P. Laiolo and J. L. Tella	2006	Fate of unproductive and unattractive habitats: recent changes in Iberian steppes and their effects on endangered avifauna	Environmental Conservation	ecological	national	ES	negative
66	10.1111/j.1365-2400.2010.00764.x	J. Gonzalvo, D. K. Moutopoulos, G. Bearzi and K. I. Stergiou	2011	Fisheries mismanagement in a Natura 2000 area in western Greece	Fisheries Management and Ecology	ecological	regional	GR	negative
67	10.1007/s10806-005-0634-2	H. D. Rosa and J. M. Da Silva	2005	From environmental ethics to nature conservation policy: Natura 2000 and the burden of proof	Journal of Agricultural & Environmental Ethics	social and policies	European	EU25	mixed
68	10.1600/036364411x604868	H. Schaefer, M. A. Carine and F. J. Rumsey	2011	From european priority species to invasive weed: Marsilea azorica (Marsileaceae) is a misidentified alien	Systematic Botany	ecological	regional	ES	negative
69	10.1016/j.jnc.2012.07.001	M. Piquer-Rodriguez, T. Kuemmerle, D. Alcaraz-Segura, R. Zurita-Milla and J. Cabello	2012	Future land use effects on the connectivity of protected area networks in southeastern Spain	Journal for Nature Conservation	ecological	regional	ES	negative
70	WOS:000285855600013	A. Mendoza-Fernandez, F. J. Perez-Garcia, J. M. Medina-Cazorla, F. Martinez-Hernandez, J. A. Garrido-Becerra, E. S. Sanchez and J. F. Mota	2010	Gap Analysis and selection of reserves for the threatened flora of eastern Andalusia, a hot spot in the eastern Mediterranean region	Acta Botanica Gallica	ecological	regional	ES	positive
71	10.1556/ComEc.9.2008.2.3	L. Rosati, M. Marignani and C. Blasi	2008	A gap analysis comparing Natura 2000 vs National Protected Area network with potential natural vegetation	Community Ecology	ecological	regional	IT	positive
72	10.1007/s10531-010-9968-9	K. Jantke, C. Schleupner and U. A. Schneider	2011	Gap analysis of European wetland species: priority regions for expanding the Natura 2000 network	Biodiversity and Conservation	ecological	European	EU27	negative
73	10.1016/j.jnc.2010.01.005	M. Gurrutxaga, P. J. Lozano and G. del Barrio	2010	GIS-based approach for incorporating the connectivity of ecological networks into regional planning	Journal for Nature Conservation	ecological	regional	ES	no opinion
74	10.1017/S0376892912000288	K. Niedzialkowski, J. Paavola and B. Jedrzejewska	2013	Governance of biodiversity in Poland before and after the accession to the EU: the tale of two roads	Environmental Conservation	social and policies	regional	PL	positive
75	10.1080/09640568.2010.549034	R. Beunen and J. R. de Vries	2011	The governance of Natura 2000 sites: the importance of initial choices in the organisation of planning processes	Journal of Environmental Planning and Management	social and policies	multinational	UK, NL	mixed
76	10.1002/aqc.689	A. Canadas, R. Sagarminaga, R. De Stephanis, E. Urquiola and P. S. Hammond	2005	Habitat preference modelling as a conservation took proposals for marine protected areas for cetaceans in southern Spanish waters	Aquatic Conservation-Marine and Freshwater Ecosystems	ecological	national	ES	no opinion
77	10.1016/j.ecoinf.2009.09.002	K. Hufkens, G. Thoonen, J. Vanden Borre, P. Scheunders and R. Ceulemans	2010	Habitat reporting of a heathland site: Classification probabilities as additional information, a case study	Ecological Informatics	ecological	national	BE	negative
78	10.1111/j.1752-4598.2011.00140.x	P. Cardoso	2012	Habitats Directive species lists: urgent need of revision	Insect Conservation and Diversity	ecological	European	EU27	negative
79	10.1002/eet.561	J. Hiedanpaa and D. W. Bromley	2011	The Harmonization Game: Reasons and Rules in European Biodiversity Policy	Environmental Policy and Governance	social and policies	European	EU27	mixed
80	10.1016/j.actao.2011.05.004	L. L. Pascual, M. Luigi, F. Alessandra, B. Emilio and B. Luigi	2011	Hotspots of species richness, threat and endemism for terrestrial vertebrates in SW Europe	Acta Oecologica	ecological	multinational	PT, ES	mixed
81	10.1016/j.landurbplan.2011.02.028	P. Russo, L. Carullo, L. Riguccio and G. Tomaselli	2011	Identification of landscapes for drafting Natura 2000 network Management Plans: A case study in Sicily	Landscape and Urban Planning	ecological	regional	IT	no opinion
82	10.1016/j.envsci.2012.10.022	N. Mikkonen and A. Moilanen	2013	Identification of top priority areas and management landscapes from a national Natura 2000 network	Environmental Science & Policy	ecological	national	FI	no opinion
83	10.1016/j.foreco.2008.05.031	E. Cantarello and A. C. Newton	2008	Identifying cost-effective indicators to assess the conservation status of forested habitats in Natura 2000 sites	Forest Ecology and Management	social and policies	multinational	IT, UK	no opinion
84	10.1016/s0264-8377(00)00031-4	L. Ledoux, S. Crooks, A. Jordan and R. K. Turner	2000	Implementing EU biodiversity policy: UK experiences	Land Use Policy	social and policies	national	UK	negative
85	10.1007/s10640-009-9341-1	S. Anthon, S. Garcia and A. Stenger	2010	Incentive Contracts for Natura 2000 Implementation in Forest Areas	Environmental & Resource Economics	social and policies	multinational	FR, DK	mixed
86	10.1890/07-0662.1	S. F. Jackson and K. J. Gaston	2008	Incorporating private lands in conservation planning: Protected areas in Britain	Ecological Applications	ecological	national	UK	negative
87	10.1017/S0030605310000530	M. Hajek, P. Hajkova, I. Apostolova, M. Horsak, Z. Rozbrojova, D. Sopotlieva and N. Velev	2010	The insecure future of Bulgarian refugial mires: economic progress versus Natura 2000	Oryx	ecological	national	BG	negative
88	10.1016/j.jnc.2010.07.003	J. Vanden Borre, D. Paelinckx, C. A. Mucher, L. Kooistra, B. Haest, G. De Blust and A. M. Schmidt	2011	Integrating remote sensing in Natura 2000 habitat monitoring: Prospects on the way forward	Journal for Nature Conservation	social and policies	regional	BE	no opinion
89	10.1017/S0376892912000392	F. Mikulcak, J. Newig, A. I. Milcu, T. Hartel and J. Fischer	2013	Integrating rural development and biodiversity conservation in Central Romania	Environmental Conservation	social and policies	regional	RO	negative
90	WOS:000285855600009	D. Evans	2010	Interpreting the habitats of Annex I: past, present and future	Acta Botanica Gallica	social and policies	European	EU27	positive
91	10.1007/s10841-010-9308-0	R. Verovnik, M. Govedic and A. Salamun	2011	Is the Natura 2000 network sufficient for conservation of butterfly diversity? A case study in Slovenia	Journal of Insect Conservation	ecological	national	SI	positive
92	10.1016/j.landurbplan.2011.02.036	M. Gurrutxaga, L. Rubio and S. Saura	2011	Key connectors in protected forest area networks and the impact of highways: A transnational case study from the Cantabrian Range to the Western Alps (SW Europe)	Landscape and Urban Planning	ecological	multinational	ES, FR, IT	positive
93	10.1016/j.ecoinf.2012.11.003	I. Wagner-Lucker, E. Lanz, M. Forster, G. A. Janauer and K. Reiter	2013	Knowledge-based framework for delineation and classification of ephemeral plant communities in riverine landscapes to support EC Habitat Directive assessment	Ecological Informatics	ecological	regional	AT	no opinion
94	10.1016/s0006-3207(99)00009-9	P. Bouchet, G. Falkner and M. B. Seddon	1999	Lists of protected land and freshwater molluscs in the Bern Convention and European Habitats Directive: are they relevant to conservation?	Biological Conservation	ecological	European	EUGeo	negative
95	10.1016/j.jenvman.2010.04.010	P. G. Dimitrakopoulos, N. Jones, T. Iosifides, I. Florokapi, O. Lasda, F. Paliouras and K. I. Evangelinos	2010	Local attitudes on protected areas: Evidence from three Natura 2000 wetland sites in Greece	Journal of Environmental Management	social and policies	regional	GR	negative
96	10.1080/19438150902924831	D. Sumares and T. Fidelis	2009	Local perceptions and postures towards the SPA "Ria de Aveiro"	Journal of Integrative Environmental Sciences	social and policies	regional	PT	negative
97	10.1177/0011392110372737	P. Alphandery and A. Fortier	2010	Local Settings and Biodiversity A Sociological Approach to the Implementation of the EC Habitats Directive in France	Current Sociology	social and policies	national	FR	negative
98	10.1017/s0376892904001018	M. Luoto, R. K. Heikkinen and T. R. Carter	2004	Loss of palsa mires in Europe and biological consequences	Environmental Conservation	ecological	multinational	FI, SE	no opinion
99	10.1016/j.apgeog.2010.07.002	G. Mallinis, D. Emmanoloudis, V. Giannakopoulos, F. Maris and N. Koutsias	2011	Mapping and interpreting historical land cover/land use changes in a Natura 2000 site using earth observational data The case of Nestos delta, Greece	Applied Geography	ecological	regional	GR	negative
100	10.1093/icesjms/fsn005	T. Bekkby and M. Isaeus	2008	Mapping large, shallow inlets and bays: modelling a Natura 2000 habitat with digital terrain and wave-exposure models	Ices Journal of Marine Science	ecological	national	SE	positive
101	10.1016/j.marpol.2012.12.002	K. Metcalfe, T. Roberts, R. J. Smith and S. R. Harrop	2013	Marine conservation science and governance in North-West Europe: Conservation planning and international law and policy	Marine Policy	social and policies	multinational	PT, ES, FR. BE, NL, DE, DK, SE, FI, UK, IE, IS	negative
102	10.1080/1943815x.2010.529150	C. Teofili and C. Battisti	2011	May the Conservation Measures Partnership open standards framework improve the effectiveness of the Natura 2000 European Network? A comparative analysis	Journal of Integrative Environmental Sciences	ecological	European	EU27	positive
103	10.1016/j.landurbplan.2009.04.003	C. A. Mucher, S. M. Hennekens, R. G. H. Bunce, J. H. J. Schaminee and M. E. Schaepman	2009	Modelling the spatial distribution of Natura 2000 habitats across Europe	Landscape and Urban Planning	ecological	European	EUGeo	no opinion
104	10.1111/j.1365-2664.2006.01268.x	R. Early and C. D. Thomas	2007	Multispecies conservation planning: identifying landscapes for the conservation of viable populations using local and continental species priorities	Journal of Applied Ecology	ecological	national	UK	positive
105	10.1078/1617-1381-00066	U. Pröbstl	2003	NATURA 2000 - The influence of the European directives on the development of nature-based sport and outdoor recreation in mountain areas	Journal for Nature Conservation	social and policies	national	DE	no opinion
106	10.1016/j.marpol.2010.09.003	H. O. Fock	2011	Natura 2000 and the European Common Fisheries Policy	Marine Policy	social and policies	European	EU27	negative
107	10.1080/1943815x.2011.556649	D. Sumares and T. Fidelis	2011	Natura 2000 and the narrative nature of nature: a case for critical discourse analysis	Journal of Integrative Environmental Sciences	social and policies	national	PT	negative
108	10.1007/s10531-012-0273-7	E. Biondi, S. Casavecchia, S. Pesaresi and L. Zivkovic	2012	Natura 2000 and the Pan-European Ecological Network: a new methodology for data integration	Biodiversity and Conservation	ecological	national	IT	positive
109	10.1505/ifor.12.1.106	P. T. Stancioiu, I. V. Abrudan and I. Dutca	2010	The Natura 2000 ecological network and forests in Romania: implications on management and administration	International Forestry Review	social and policies	national	RO	positive
110	10.1080/1523908x.2010.505417	F. Ferranti, R. Beunen and M. Speranza	2010	Natura 2000 Network: A Comparison of the Italian and Dutch Implementation Experiences	Journal of Environmental Policy & Planning	social and policies	multinational	NL, IT	negative
111	10.1093/icesjms/fsn193	S. A. Pedersen, H. Fock, J. Krause, C. Pusch, A. L. Sell, U. Bottcher, S. I. Rogers, M. Skold, H. Skov, M. Podolska, G. J. Piet and J. C. Rice	2009	Natura 2000 sites and fisheries in German offshore waters	Ices Journal of Marine Science	ecological	national	DE	no opinion
112	10.1080/13504509.2012.761657	P. Ganatsas, M. Tsakaldimi and D. Katsaros	2013	Natural resource management in national parks: a management assessment of a Natura 2000 wetlands site in Kotychi-Strofylia, southern Greece	International Journal of Sustainable Development and World Ecology	ecological	regional	GR	negative
113	10.1016/j.envpol.2003.10.028	J. Oszlanyi, K. Grodzinska, O. Badea and Y. Shparyk	2004	Nature conservation in Central and Eastern Europe with a special emphasis on the Carpathian Mountains	Environmental Pollution	ecological	multinational	PL, CZ, SK, UA, RO	positive
114	10.1016/j.envsci.2006.03.003	K. Papageorgiou and I. N. Vogiatzakis	2006	Nature protection in Greece: an appraisal of the factors shaping integrative conservation and policy effectiveness	Environmental Science & Policy	social and policies	national	GR	negative
115	WOS:000079274000017	O. P. Ostermann	1998	The need for management of nature conservation sites designated under Natura 2000	Journal of Applied Ecology	ecological	European	EU15	mixed
116	10.1016/j.marpol.2006.10.001	E. M. De Santo and P. J. S. Jones	2007	Offshore marine conservation policies in the North East Atlantic: Emerging tensions and opportunities	Marine Policy	social and policies	regional	UK	no opinion
117	10.1007/s10841-008-9198-6	K. Zografou, S. Sfenthourakis, A. Pullin and V. Kati	2009	On the surrogate value of red-listed butterflies for butterflies and grasshoppers: a case study in Grammos site of Natura 2000, Greece	Journal of Insect Conservation	ecological	regional	GR	positive
118	WOS:000279919300013	E. Andrulewicz, Z. Otremba and K. Kaminska	2010	Ongoing Technical Activities and Conservation Measures in Maritime Spatial Planning within Polish Marine Areas	Polish Journal of Environmental Studies	ecological	national	PL	negative
119	10.1111/j.1475-4959.2010.00391.x	M. Hirschnitz-Garbers and S. Stoll-Kleemann	2011	Opportunities and barriers in the implementation of protected area management: a qualitative meta-analysis of case studies from European protected areas	Geographical Journal	ecological	multinational	AT, CZ, DE, GR, IT, NO, CH, NL, UA, UK	mixed
120	10.1017/S0376892913000039	L. C. Stringer and J. Paavola	2013	Participation in environmental conservation and protected area management in Romania: A review of three case studies	Environmental Conservation	social and policies	regional	RO	negative
121	10.1016/j.jenvman.2012.09.006	E. Apostolopoulou, E. G. Drakou and K. Pediaditi	2012	Participation in the management of Greek Natura 2000 sites: Evidence from a cross-level analysis	Journal of Environmental Management	social and policies	regional	GR	negative
122	10.1016/j.landusepol.2012.07.009	R. Beunen, K. Van Assche and M. Duineveld	2013	Performing failure in conservation policy: The implementation of European Union directives in the Netherlands	Land Use Policy	social and policies	national	NL	negative
123	10.1016/j.biocon.2012.08.024	B. A. Lukács, G. Sramkó and A. Molnár V	2013	Plant diversity and conservation value of continental temporary pools	Biological Conservation	ecological	multinational	AT, CZ, HU, SK, SRB, UA, RO	positive
124	10.1016/j.jnc.2012.06.001	M. Rubio-Salcedo, I. Martínez, F. Carreño and A. Escudero	2013	Poor effectiveness of the Natura 2000 network protecting Mediterranean lichen species	Journal for Nature Conservation	ecological	national	ES	negative
125	10.1017/S0025315412000914	J. Micael, M. J. Alves and A. C. Costa	2013	The population dynamics of Ophidiaster ophidianus (Echinodermata: Asteroidea) in the Azores, at the north-western periphery of its distribution	Journal of the Marine Biological Association of the United Kingdom	ecological	regional	PT	positive
126	10.1007/s10750-010-0424-3	F. Ecke, S. Hellsten, M. Mjelde, M. Kuoppala and S. Schlacke	2010	Potential conflicts between environmental legislation and conservation exemplified by aquatic macrophytes	Hydrobiologia	ecological	multinational	SE, NO, FI	no opinion
127	10.1016/j.jnc.2008.09.001	R. M. Higgins, F. Vandeperre, A. Perez-Ruzafa and R. S. Santos	2008	Priorities for fisheries in marine protected area design and management: Implications for artisanal-type fisheries as found in southern Europe	Journal for Nature Conservation	ecological	multinational	ES, FR, IT, PT, MT	negative
128	10.1111/Acv.12016	M. D'Amen, P. Bombi, A. Campanaro, L. Zapponi, M. A. Bologna and F. Mason	2013	Protected areas and insect conservation: Questioning the effectiveness of Natura 2000 network for saproxylic beetles in Italy	Animal Conservation	ecological	national	IT	negative
129	10.1196/annals.1439.006	K. J. Gaston, S. E. Jackson, A. Nagy, L. Cantu-Salazar and M. Johnson	2008	Protected areas in Europe - Principle and practice	Year in Ecology and Conservation Biology 2008	ecological	European	EU27	negative
130	WOS:000308651400009	J. Otegui, A. Villarroya and A. H. Arino	2012	Protected areas in the Spanish Pyrenees: A meaningful way to preserve biodiversity?	Environmental Engineering and Management Journal	ecological	regional	ES	positive
131	WOS:000299017200009	S. Katsanevakis, D. Poursanidis, Y. Issaris, A. Panou, D. Petza, V. Vassilopoulou, I. Chaldaiou and M. Sini	2011	Protected marine shelled molluscs: thriving in Greek seafood restaurants	Mediterranean Marine Science	social and policies	national	GR	negative
132	10.3846/16486897.2012.663089	M. Cai and D. Pettenella	2013	Protecting biodiversity outside protected areas: Can agricultural landscapes contribute to bird conservation on Natura 2000 in Italy?	Journal of Environmental Engineering and Landscape Management	ecological	national	IT	positive
133	10.1016/j.biocon.2008.07.024	A. Chiarucci, G. Bacaro and D. Rocchini	2008	Quantifying plant species diversity in a Natura 2000 network: Old ideas and new proposals	Biological Conservation	ecological	national	IT	positive
134	10.1007/s10531-010-9835-8	A. Hernando, R. Tejera, J. Velazquez and M. V. Nunez	2010	Quantitatively defining the conservation status of Natura 2000 forest habitats and improving management options for enhancing biodiversity	Biodiversity and Conservation	ecological	regional	ES	mixed
135	10.1111/j.1466-822X.2004.00086.x	P. G. Dimitrakopoulos, D. Memtsas and A. Y. Troumbis	2004	Questioning the effectiveness of the Natura 2000 Special Areas of Conservation strategy: the case of Crete	Global Ecology and Biogeography	ecological	regional	GR	negative
136	10.1007/s10531-008-9459-4	R. Graziano, P. Gilberto and F. Alessandro	2009	A rapid and cost-effective tool for managing habitats of the European Natura 2000 network: a case study in the Italian Alps	Biodiversity and Conservation	ecological	regional	IT	no opinion
137	10.1016/j.actao.2007.06.002	D. Gutierrez and R. Menendez	2007	Regional hotspots of butterfly diversity in a protected area: Are they indicators of unique assemblages and areas with more species of conservation concern?	Acta Oecologica-International Journal of Ecology	ecological	national	ES	no opinion
138	10.1016/j.ecolind.2012.08.024	W. D. Simonson, H. D. Allen and D. A. Coomes	2013	Remotely sensed indicators of forest conservation status: Case study from a Natura 2000 site in southern Portugal	Ecological Indicators	ecological	regional	PT	positive
139	10.1016/j.gloenvcha.2011.07.001	A. L. R. Jackson	2011	Renewable energy vs. biodiversity: Policy conflicts and the future of nature conservation	Global Environmental Change-Human and Policy Dimensions	social and policies	multinational	PT, UK	mixed
140	10.1007/s10531-008-9359-7	S. Lengyel, A. Kobler, L. Kutnar, E. Framstad, P. Y. Henry, V. Babij, B. Gruber, D. Schmeller and K. Henle	2008	A review and a framework for the integration of biodiversity monitoring at the habitat level	Biodiversity and Conservation	ecological	European	EU27	negative
141	10.1007/s00267-011-9751-z	N. Selva, S. Kreft, V. Kati, M. Schluck, B. G. Jonsson, B. Mihok, H. Okarma and P. L. Ibisch	2011	Roadless and low-traffic reas as conservation targets in Europe	Environmental Management	ecological	national	DE	negative
142	10.1016/j.ecolind.2012.05.016	O. Bastian	2013	The role of biodiversity in supporting ecosystem services in Natura 2000 sites	Ecological Indicators	social and policies	multinational	DE, CZ	no opinion
143	10.1007/s10661-011-2004-z	M. Bodesmo, L. Pacicco, B. Romano and A. Ranfa	2012	The role of environmental and socio-demographic indicators in the analysis of land use changes in a protected area of the Natura 2000 Network: the case study of Lake Trasimeno, Umbria, Central Italy	Environmental Monitoring and Assessment	social and policies	regional	IT	no opinion
144	10.1017/S0376892912000380	J. Cent, C. Mertens and K. Niedzialkowski	2013	Roles and impacts of non-governmental organizations in Natura 2000 implementation in Hungary and Poland	Environmental Conservation	social and policies	multinational	PL, HU	positive
145	10.1002/aqc.633	D. Sanchez-Fernandez, P. Abellan, J. Velasco and A. Millan	2004	Selecting areas to protect the biodiversity of aquatic ecosystems in a semiarid Mediterranean region using water beetles	Aquatic Conservation-Marine and Freshwater Ecosystems	ecological	regional	ES	positive
146	10.1016/j.biocon.2008.08.015	E. Branquart, K. Verheyen and J. Latham	2008	Selection criteria of protected forest areas in Europe: The theory and the real world	Biological Conservation	social and policies	European	EU25	positive
147	10.1016/j.ecoleng.2010.04.011	T. M. Koutsos, G. C. Dimopoulos and A. P. Mamolos	2010	Spatial evaluation model for assessing and mapping impacts on threatened species in regions adjacent to Natura 2000 sites due to dam construction	Ecological Engineering	ecological	regional	GR	mixed
148	10.1016/j.ecolind.2005.03.018	M. Bock, G. Rossner, M. Wissen, K. Remm, T. Langanke, S. Lang, H. Klug, T. Blaschke and B. Vrscaj	2005	Spatial indicators for nature conservation from European to local scale	Ecological Indicators	ecological	multinational	DE, EE, AT, SK	no opinion
149	10.1016/j.landurbplan.2011.03.004	T. Edman, P. Angelstam, G. Mikusinski, J. M. Roberge and A. Sikora	2011	Spatial planning for biodiversity conservation: Assessment of forest landscapes' conservation value using umbrella species requirements in Poland	Landscape and Urban Planning	ecological	national	PL	no opinion
150	10.1016/j.jnc.2011.04.001	M. Panitsa, N. Koutsias, I. Tsiripidis, A. Zotos and P. Dimopoulos	2011	Species-based versus habitat-based evaluation for conservation status assessment of habitat types in the East Aegean islands (Greece)	Journal for Nature Conservation	ecological	regional	GR	no opinion
151	10.1007/s11273-008-9129-z	K. Kimmel, A. Kull, J. O. Salm and U. Mander	2010	The status, conservation and sustainable use of Estonian wetlands	Wetlands Ecology and Management	social and policies	national	EE	positive
152	10.1007/s10841-010-9356-5	M. S. Warren and N. A. D. Bourn	2011	Ten challenges for 2010 and beyond to conserve Lepidoptera in Europe	Journal of Insect Conservation	ecological	national	UK	negative
153	10.1016/0006-3207(95)00107-7	F. D. Lozano, D. G. Herbada, L. M. Rivero, J. C. M. Saiz and H. S. Ollero	1996	Threatened plants in peninsular and balearic Spain: A report based on the EU habitats directive	Biological Conservation	ecological	national	ES	negative
154	10.3832/ifor0410-0010075	E. Cantarello and A. Newton	2008	Towards cost-effective indicators to maintain Natura 2000 sites in favourable conservation status. Preliminary results from Cansiglio and New Forest	Iforest-Biogeosciences and Forestry	social and policies	multinational	IT, UK	positive
155	10.1080/02757541003693193	M. Abbiati, M. Mistri, M. Bartoli, V. U. Ceccherelli, M. A. Colangelo, C. R. Ferrari, G. Giordani, C. Munari, D. Nizzoli, M. Ponti, R. Rossi and P. Viaroli	2010	Trade-off between conservation and exploitation of the transitional water ecosystems of the northern Adriatic Sea	Chemistry and Ecology	ecological	regional	IT	no opinion
156	10.1111/j.1755-263X.2009.00054.x	T. Rosen and A. Bath	2009	Transboundary management of large carnivores in Europe: from incident to opportunity	Conservation Letters	social and policies	multinational	IT, DE	negative
157	10.1007/s10980-013-9863-3	V. Tomaselli, P. Dimopoulos, C. Marangi, A. S. Kallimanis, M. Adamo, C. Tarantino, M. Panitsa, M. Terzi, G. Veronico, F. Lovergine, H. Nagendra, R. Lucas, P. Mairota, C. A. Mucher and P. Blonda	2013	Translating land cover/land use classifications to habitat taxonomies for landscape monitoring: a Mediterranean assessment	Landscape Ecology	ecological	multinational	IT, GR	no opinion
158	10.1007/s10640-004-9455-4	C. Z. Li, J. Kuuluvainen, E. Pouta, M. Rekola and O. Tahvonen	2004	Using choice experiments to value the natura 2000 nature conservation programs in Finland	Environmental & Resource Economics	social and policies	national	FI	negative
159	10.1016/j.ecolind.2012.11.016	V. D. Litskas, C. S. Karaolis, G. C. Menexes, A. P. Mamolos, T. M. Koutsos and K. L. Kalburtji	2013	Variation of energy flow and greenhouse gas emissions in vineyards located in Natura 2000 sites	Ecological Indicators	ecological	regional	CY	mixed
160	10.1007/s10531-011-9989-z	L. Halada, D. Evans, C. Romao and J. E. Petersen	2011	Which habitats of European importance depend on agricultural practices?	Biodiversity and Conservation	ecological	European	EU27	negative
161	10.1016/j.biocon.2004.12.001	F. Wätzold and K. Schwerdtner	2005	Why be wasteful when preserving a valuable resource? A review article on the cost-effectiveness of European biodiversity conservation policy	Biological Conservation	ecological	European	EU25	mixed
162	10.1016/j.biocon.2010.11.004	M. D'Amen, P. Bombi, P. B. Pearman, D. R. Schmatz, N. E. Zimmermann and M. A. Bologna	2011	Will climate change reduce the efficacy of protected areas for amphibian conservation in Italy?	Biological Conservation	ecological	national	IT	mixed
163	10.1016/j.ecolind.2013.02.023	A. D. Mazaris, M. A. Tsianou, A. Sigkounas, P. Dimopoulos, J. D. Pantis, S. P. Sgardelis and A. S. Kallimanis	2013	Accounting for the capacity of common and rare species to contribute to diversity spatial patterns: Is it a sampling issue or a biological effect?	Ecological Indicators	ecological	national	GR	no opinion
164	10.1016/j.jenvman.2013.08.054	I. Grammatikopoulou and S. B. Olsen	2013	Accounting protesting and warm glow bidding in Contingent Valuation surveys considering the management of environmental goods - An empirical case study assessing the value of protecting a Natura 2000 wetland area in Greece	Journal of Environmental Management	social and policies	regional	GR	no opinion
165	10.1016/j.jag.2011.05.013	G. Thoonen, K. Hufkens, J. Vanden Borre, T. Spanhove and P. Scheunders	2012	Accuracy assessment of contextual classification results for vegetation mapping	International Journal of Applied Earth Observation and Geoinformation	ecological	regional	BE	no opinion
166	WOS:000268571000009	P. A. Olsson, L. M. Martensson and H. H. Bruun	2009	Acidification of sandy grasslands - consequences for plant diversity	Applied Vegetation Science	ecological	regional	SE	no opinion
167	10.1093/icesjms/fsr025	S. Sveegaard, J. Teilmann, P. Berggren, K. N. Mouritsen, D. Gillespie and J. Tougaard	2011	Acoustic surveys confirm the high-density areas of harbour porpoises found by satellite tracking	Ices Journal of Marine Science	ecological	regional	DK	positive
168	10.1017/s0376892912000422	D. Evans, A. Demeter, P. Gajdos and L. Halada	2013	Adapting environmental conservation legislation for an enlarged European Union: experience from the Habitats Directive	Environmental Conservation	social and policies	European	EU27	no opinion
169	10.1111/j.1365-2664.2008.01569.x	C. C. Vos, P. Berry, P. Opdam, H. Baveco, B. Nijhof, J. O'Hanley, C. Bell and H. Kuipers	2008	Adapting landscapes to climate change: examples of climate-proof ecosystem networks and priority adaptation zones	Journal of Applied Ecology	ecological	multinational	IE, GB, BE, NL, DE, DK, NO, SE, FR, LU	negative
170	10.1007/s10531-013-0473-9	G. Bonanno	2013	Adaptive management as a tool to improve the conservation of endemic floras: the case of Sicily, Malta and their satellite islands	Biodiversity and Conservation	ecological	multinational	IT, MT	positive
171	WOS:000225944400025	I. L. Andueza and V. S. Alcayde	2004	Advances in the action plan for Emys orbicularis in the Valencia region, Spain	Biologia	ecological	regional	ES	positive
172	10.1016/j.jnc.2006.11.001	M. A. Cronin, C. D. Duck and O. O. Cadhla	2007	Aerial surveying of grey seat breeding colonies on the blasket islands, Co. kerry, the inishkea group, Co. Mayo and the Donegal coast, Ireland	Journal for Nature Conservation	ecological	national	IE	no opinion
173	10.1111/j.1469-1795.2012.00559.x	P. Fehervari, S. Solt, P. Palatitz, K. Barna, A. Agoston, J. Gergely, A. Nagy, K. Nagy and A. Harnos	2012	Allocating active conservation measures using species distribution models: a case study of red-footed falcon breeding site management in the Carpathian Basin	Animal Conservation	ecological	multinational	HU, RO, RS	positive
175	WOS:000295653400026	G. Lopez-Pantoja, L. Dominguez and I. Sanchez-Osorio	2011	Analysis of Prinobius myardi Mulsant population dynamics in a Mediterranean cork oak stand	Annales De La Societe Entomologique De France	ecological	national	ES	no opinion
176	10.1016/j.biocon.2008.03.018	A. Thomaes, T. Kervyn and D. Maes	2008	Applying species distribution modelling for the conservation of the threatened saproxylic Stag Beetle (Lucanus cervus)	Biological Conservation	ecological	regional	BE	negative
177	10.1556/ComEc.9.2008.2.4	M. Forster, A. Frick, H. Walentowski and B. Kleinschmit	2008	Approaches to utilising QuickBird data for the monitoring of NATURA 2000 habitats	Community Ecology	ecological	regional	DE	negative
178	10.1016/s0167-8809(01)00235-3	S. Muller	2002	Appropriate agricultural management practices required to ensure conservation and biodiversity of environmentally sensitive grassland sites designated under Natura 2000	Agriculture Ecosystems & Environment	social and policies	regional	FR	no opinion
179	10.1002/aqc.883	J. Garrido and I. Munilla	2008	Aquatic Coleoptera and Hemiptera assemblages in three coastal lagoons of the NW Iberian Peninsula: assessment of conservation value and response to environmental factors	Aquatic Conservation-Marine and Freshwater Ecosystems	ecological	regional	ES	mixed
180	WOS:000268233300004	Y. Barbier, P. Lejeune, M. Dufrene and J. Rondeux	2009	An ArcGIS-based tool for the relational data management assistance of Natura 2000 habitat units in the Walloon Region, Belgium	Biotechnologie Agronomie Societe Et Environnement	ecological	regional	BE	no opinion
181	10.1080/11263504.2013.778911	E. Farris, Z. Secchi, L. Rosati and R. Filigheddu	2013	Are all pastures eligible for conservation? A phytosociological survey of the Sardinian-Corsican Province as a basic tool for the Habitats Directive	Plant Biosystems	ecological	regional	IT	positive
182	10.1080/11263504.2012.704887	G. Buffa and M. Villani	2012	Are the ancient forests of the Eastern Po Plain large enough for a long term conservation of herbaceous nemoral species?	Plant Biosystems	ecological	regional	IT	positive
183	WOS:000232856900004	D. Llusia and J. J. Onate	2005	Are the conservation requirements of pseudo-steppe birds adequately covered by Spanish agri-environmental schemes? An ex-ante assessment	Ardeola	social and policies	regional	ES	mixed
184	10.1016/j.biocon.2008.04.005	D. Sanchez-Fernandez, D. T. Bilton, P. Abellan, I. Ribera, J. Vezasco and A. Millan	2008	Are the endemic water beetles of the Iberian Peninsula and the Balearic Islands effectively protected?	Biological Conservation	ecological	multinational	ES, PT	negative
185	10.1007/s10750-006-0165-5	R. Wingfield, K. J. Murphy and M. Gaywood	2006	Assessing and predicting the success of Najas flexilis (Willd.) Rostk. & Schmidt, a rare European aquatic macrophyte, in relation to lake environmental conditions	Hydrobiologia	ecological	national	UK	negative
186	10.2193/2006-312	R. M. Chefaoui and J. M. Lobo	2007	Assessing the conservation status of an Iberian moth using pseudo-absences	Journal of Wildlife Management	ecological	multinational	ES, PT	negative
187	10.1051/limn/2006004	E. Dimitriou, I. Karaouzas, N. Skoulikidis and I. Zacharias	2006	Assessing the environmental status of Mediterranean temporary ponds in Greece	Annales De Limnologie-International Journal of Limnology	ecological	regional	GR	mixed
188	10.1002/aqc.2303	I. Tomankova, H. Boland, N. Reid and A. D. Fox	2013	Assessing the extent to which temporal changes in waterbird community composition are driven by either local, regional or global factors	Aquatic Conservation-Marine and Freshwater Ecosystems	ecological	regional	UK	negative
189	10.1007/s10531-013-0502-8	G. Bonanomi, G. Incerti and M. Allegrezza	2013	Assessing the impact of land abandonment, nitrogen enrichment and fairy-ring fungi on plant diversity of Mediterranean grasslands	Biodiversity and Conservation	ecological	regional	IT	no opinion
190	10.1016/j.landurbplan.2006.02.006	T. Langanke, C. Burnett and S. Lang	2007	Assessing the mire conservation status of a raised bog site in Salzburg using object-based monitoring and structural analysis	Landscape and Urban Planning	ecological	regional	AT	no opinion
191	10.1111/acv.12030	V. Pellissier, J. Touroult, R. Julliard, J. P. Siblet and F. Jiguet	2013	Assessing the Natura 2000 network with a common breeding birds survey	Animal Conservation	ecological	national	FR	positive
192	10.1111/j.1469-1795.2006.00066.x	P. M. Thompson, B. Mackey, T. R. Barton, C. Duck and J. R. A. Butler	2007	Assessing the potential impact of salmon fisheries management on the conservation status of harbour seals (Phoca vitulina) in north-east Scotland	Animal Conservation	ecological	regional	UK	negative
193	10.1016/j.biocon.2010.07.004	R. A. Stillman, J. J. Moore, A. P. Woolmer, M. D. Murphy, P. Walkere, K. R. Vanstaen, D. Palmer and W. G. Sanderson	2010	Assessing waterbird conservation objectives: An example for the Burry Inlet, UK	Biological Conservation	ecological	regional	UK	negative
194	10.1016/j.rse.2010.03.009	G. del Barrio, J. Puigdefabregas, M. E. Sanjuan, M. Stellmes and A. Ruiz	2010	Assessment and monitoring of land condition in the Iberian Peninsula, 1989-2000	Remote Sensing of Environment	ecological	multinational	ES, PT	no opinion
195	10.1016/j.fishres.2008.09.013	I. J. Winfield, J. M. Fletcher, J. B. James and C. W. Bean	2009	Assessment of fish populations in still waters using hydroacoustics and survey gill netting: Experiences with Arctic charr (Salvelinus alpinus) in the UK	Fisheries Research	ecological	regional	UK	negative
196	10.1016/j.jnc.2012.02.001	J. Franke, V. Keuck and F. Siegert	2012	Assessment of grassland use intensity by remote sensing to support conservation schemes	Journal for Nature Conservation	ecological	regional	DE	positive
197	10.1111/j.1469-7998.2007.00316.x	M. Cronin, C. Duck, O. O. Cadhla, R. Nairn, D. Strong and C. O'Keeffe	2007	An assessment of population size and distribution of harbour seals in the Republic of Ireland during the moult season in August 2003	Journal of Zoology	ecological	national	IE	no opinion
199	10.1017/s0376892904001201	M. Tonder and J. Jurvelius	2004	Attitudes towards fishery and conservation of the Saimaa ringed seal in Lake Pihlajavesi, Finland	Environmental Conservation	social and policies	regional	FI	negative
200	10.1007/s10661-007-9981-y	R. A. D. Varela, P. R. Rego, S. C. Iglesias and C. M. Sobrino	2008	Automatic habitat classification methods based on satellite images: A practical assessment in the NW Iberia coastal mountains	Environmental Monitoring and Assessment	ecological	regional	ES	negative
201	10.1016/j.jenvman.2010.03.018	V. Moreno, M. B. Morales and J. Traba	2010	Avoiding over-implementation of agri-environmental schemes for steppe bird conservation: A species-focused proposal based on expert criteria	Journal of Environmental Management	ecological	regional	ES	positive
202	WOS:000255137600005	J. Wjacek	2008	Benefits and costs of semi-colonial breeding in the Montagu's Harrier Circus pygargus	Belgian Journal of Zoology	ecological	regional	PL	no opinion
203	10.1016/j.landurbplan.2007.07.004	K. C. Santos, J. Pino, F. Roda, M. Guirado and J. Ribas	2008	Beyond the reserves: The role of non-protected rural areas for avifauna conservation in the area of Barcelona (NE of Spain)	Landscape and Urban Planning	ecological	regional	ES	negative
204	10.1007/s10531-011-0210-1	C. Barbera, J. Moranta, F. Ordines, M. Ramon, A. de Mesa, M. Diaz-Valdes, A. M. Grau and E. Massuti	2012	Biodiversity and habitat mapping of Menorca Channel (western Mediterranean): implications for conservation	Biodiversity and Conservation	ecological	regional	ES	no opinion
205	10.1016/j.ecolind.2013.05.020	A. Palo, M. Ivask and J. Liira	2013	Biodiversity composition reflects the history of ancient semi-natural woodland and forest habitats-Compilation of an indicator complex for restoration practice	Ecological Indicators	ecological	regional	EE	no opinion
206	10.1002/aqc.2327	A. Lumbreras, C. Pardo and J. A. Molina	2013	Bioindicator role of aquatic Ranunculus in Mediterranean freshwater habitats	Aquatic Conservation-Marine and Freshwater Ecosystems	ecological	regional	ES	negative
207	10.1016/j.ecolind.2011.04.012	C. Pinto-Cruz, A. M. Barbosa, J. A. Molina and M. D. Espirito-Santo	2011	Biotic and abiotic parameters that distinguish types of temporary ponds in a Portuguese Mediterranean ecosystem	Ecological Indicators	ecological	regional	PT	no opinion
208	WOS:000303663000014	R. Merken, F. Servaes, A. Sfougaris and N. Koedam	2012	Birds in a complex agricultural landscape in Central Greece: the role of landscape elements and the landscape matrix	Journal of Biological Research-Thessaloniki	ecological	regional	GR	mixed
209	WOS:000229006400008	N. Faria and J. E. Rabaqa	2004	Breeding habitat modelling of the Little Bustard Tetrax tetrax in the site of community importance of Cabrela (Portugal)	Ardeola	ecological	regional	PT	mixed
210	10.1080/15239080801928428	B. Laffan and J. O'Mahony	2008	'Bringing Politics Back In'. Domestic Conflict and the Negotiated Implementation of EU Nature Conservation Legislation in Ireland	Journal of Environmental Policy & Planning	social and policies	national	IE	no opinion
211	10.1080/11263500903220190	A. Cogoni, A. Scrugli and P. Cortis	2009	Bryophyte flora of some temporary pools in Sardinia and Corsica	Plant Biosystems	ecological	multinational	FR, IT	no opinion
212	10.1111/mam.12001	G. Chisamera, E. V. Buzan, T. Sahlean, D. Murariu, S. Zupan and B. Krystufek	2014	Bukovina blind mole rat Spalax graecus revisited: phylogenetics, morphology, taxonomy, habitat associations and conservation	Mammal Review	ecological	multinational	RO, UA	no opinion
213	10.1007/s10841-008-9148-3	R. L. H. Dennis, L. Dapporto, T. G. Shreeve, E. John, J. G. Coutsis, O. Kudrna, K. Saarinen, N. Ryrholm and W. R. Williams	2008	Butterflies of European islands: the implications of the geography and ecology of rarity and endemicity for conservation	Journal of Insect Conservation	ecological	European	EUGeo	no opinion
214	10.1016/j.ecolind.2012.01.025	T. Spanhove, J. Vanden Borre, S. Delalieux, B. Haest and D. Paelinckx	2012	Can remote sensing estimate fine-scale quality indicators of natural habitats?	Ecological Indicators	ecological	regional	BE	no opinion
215	10.1111/j.1752-4598.2012.00194.x	A. Jaeschke, T. Bittner, B. Reineking and C. Beierkuhnlein	2013	Can they keep up with climate change? - Integrating specific dispersal abilities of protected Odonata in species distribution modelling	Insect Conservation and Diversity	ecological	European	EU25	mixed
216	10.1111/j.1365-2664.2010.01814.x	A. D. Mazaris, A. S. Kallimanis, J. Tzanopoulos, S. P. Sgardelis and J. D. Pantis	2010	Can we predict the number of plant species from the richness of a few common genera, families or orders?	Journal of Applied Ecology	ecological	national	GR	no opinion
217	WOS:000256110800015	M. Hardegen, C. Bougault and E. Quere	2008	Cartography of habitats in Natura 2000 sites from Britain. Application to the maritime heathlands of Groix island and Crozon peninsula	Acta Botanica Gallica	ecological	regional	FR	negative
218	10.1023/a:1008828704456	M. Schnittler and K. F. Gunther	1999	Central European vascular plants requiring priority conservation measures - an analysis from national Red Lists and distribution maps	Biodiversity and Conservation	ecological	multinational	NL, BE, DE, FR, LU, DE, IT, PL, CZ, SK, SI, AT, HU	no opinion
219	10.1016/j.biocon.2013.04.010	P. S. Hammond, K. Macleod, P. Berggren, D. L. Borchers, L. Burt, A. Canadas, G. Desportes, G. P. Donovan, A. Gilles, D. Gillespie, J. Gordon, L. Hiby, I. Kuklik, R. Leaper, K. Lehnert, M. Leopold, P. Lovell, N. Oien, C. G. M. Paxton, V. Ridoux, E. Rogan, F. Samarra, M. Scheidat, M. Sequeira, U. Siebert, H. Skov, R. Swift, M. L. Tasker, J. Teilmann, O. Van Canneyt and J. A. Vazquez	2013	Cetacean abundance and distribution in European Atlantic shelf waters to inform conservation and management	Biological Conservation	ecological	multinational	BE, DK, FR, DE, IE, NL, NO, PL, PT, ES, SE, UK	positive
220	10.1016/s0967-0637(02)00123-1	A. Canadas, R. Sagarminaga and S. Garcia-Tiscar	2002	Cetacean distribution related with depth and slope in the Mediterranean waters off southern Spain	Deep-Sea Research Part I-Oceanographic Research Papers	ecological	regional	IT	no opinion
222	WOS:000301696500002	A. Kowalska	2012	CHANGES IN THE AREA OF PROTECTED PLANT COMMUNITIES IN THE MIDDLE VISTULA RIVER VALLEY IN THE SECOND HALF OF THE 20TH CENTURY	Polish Journal of Ecology	ecological	regional	PL	positive
223	WOS:000270489400022	C. Mendes and E. Dias	2009	Characterisation of Sanguinhal Mire, Terceira Island (Azores): a protected quaking bog habitat	Acta Botanica Brasilica	ecological	regional	PT	mixed
224	10.1111/j.1365-2486.2008.01666.x	I. M. D. Maclean, G. E. Austin, M. M. Rehfisch, J. Blew, O. Crowe, S. Delany, K. Devos, B. Deceuninck, K. Gunther, K. Laursen, M. Van Roomen and J. Wahl	2008	Climate change causes rapid changes in the distribution and site abundance of birds in winter	Global Change Biology	ecological	multinational	BE, DK, FR, DE, IE, NL, UK	positive
225	10.1016/j.biocon.2009.10.024	I. Kleinbauer, S. Dullinger, J. Peterseil and F. Essl	2010	Climate change might drive the invasive tree Robinia pseudacacia into nature reserves and endangered habitats	Biological Conservation	ecological	national	AT	mixed
226	10.1016/j.tnarpol.2007.03.004	D. E. Johnson, J. Bartlett and L. A. Nash	2007	Coastal lagoon habitat re-creation potential in Hampshire, England	Marine Policy	ecological	regional	UK	positive
227	10.1007/s12224-011-9118-5	D. Ciccarelli, G. Bacaro and A. Chiarucci	2012	Coastline Dune Vegetation Dynamics: Evidence of No Stability	Folia Geobotanica	ecological	regional	IT	no opinion
228	10.1016/j.jenvman.2013.06.023	J. M. Fliervoet, R. J. G. Van den Born, A. J. M. Smits and L. Knippenberg	2013	Combining safety and nature: A multi-stakeholder perspective on integrated floodplain management	Journal of Environmental Management	social and policies	regional	NL	negative
229	10.1080/11263504.2011.623190	F. Lombardi, M. Klopcic, P. Di Martino, R. Tognetti, G. Chirici, A. Boncina and M. Marchetti	2012	Comparison of forest stand structure and management of silver fir-European beech forests in the Central Apennines, Italy and in the Dinaric Mountains, Slovenia	Plant Biosystems	ecological	multinational	IT, SI	positive
230	WOS:000261548600005	T. Stechova, M. Hajek, P. Hajkova and J. Navratilova	2008	Comparison of habitat requirements of the mosses Hamatocaulis vernicosus, Scorpidium cossonii and Warnstorfia exannulata in different parts of temperate Europe	Preslia	ecological	multinational	BG, CZ, SK, PL	no opinion
231	WOS:000322439500001	A. Slepetiene, I. Liaudanskiene, J. Slepetys, V. Stukonis, I. Jokubauskaite and J. Ceseviciene	2013	Comparison of soil organic matter content and composition in protected areas of NATURA 2000 and agrarian lands	Journal of Food Agriculture & Environment	ecological	regional	LT	no opinion
232	10.1093/jel/eqs007	D. McGillivray	2012	Compensating Biodiversity Loss: The EU Commission's Approach to Compensation under Article 6 of the Habitats Directive	Journal of Environmental Law	social and policies	European	EU27	positive
233	10.1006/jfbi.2001.1757	M. L. Koljonen	2001	Conservation goals and fisheries management units for Atlantic salmon in the Baltic Sea area	Journal of Fish Biology	ecological	multinational	DK, EE, LV, FI, DE, PL, SE, NO	no opinion
234	10.1007/s10531-005-5045-1	C. Ryder, J. Moran, R. Mc Donnell and M. Gormally	2005	Conservation implications of grazing practices on the plant and dipteran communities of a turlough in Co. Mayo, Ireland	Biodiversity and Conservation	ecological	regional	IE	negative
235	WOS:000174722400008	B. Ni Bhriain, M. S. Skeffington and M. Gormally	2002	Conservation implications of land use practices on the plant and carabid beetle communities of two turloughs in Co. Galway, Ireland	Biological Conservation	ecological	regional	IE	no opinion
236	10.1023/B:VEGE.0000029377.59216.e5	V. Leone and R. Lovreglio	2004	Conservation of Mediterranean pine woodlands: scenarios and legislative tools	Plant Ecology	social and policies	multinational	ES, PT, FR, IT, SI, HR, GR, CY	positive
237	10.1002/aqc.2306	N. Reid, A. Keys, J. S. Preston, E. Moorkens, D. Roberts and C. D. Wilson	2013	Conservation status and reproduction of the critically endangered freshwater pearl mussel (Margaritifera margaritifera) in Northern Ireland	Aquatic Conservation-Marine and Freshwater Ecosystems	ecological	regional	IE	mixed
238	10.1080/11263500902722493	S. Pisanu, R. Filigheddu and E. Farris	2009	The conservation status of an endemic species of northern Sardinia: Centaurea horrida Badaro (Asteraceae)	Plant Biosystems	ecological	regional	IT	negative
239	WOS:000220742200004	M. I. Romero, P. Ramil and M. Rubinos	2004	Conservation status of Eryngium viviparum Gay	Acta Botanica Gallica	ecological	multinational	ES, PT	negative
240	10.1080/11263504.2013.860052	E. V. Perrino, V. Tomaselli, R. Costa and P. Pavone	2013	Conservation status of habitats (Directive 92/43 EEC) of coastal and low hill belts in a Mediterranean biodiversity hot spot (Gargano - Italy)	Plant Biosystems	ecological	regional	IT	negative
241	10.1002/aqc.935	S. Brusconi, S. Bertocchi, B. Renai, M. Scalici, C. Souty-Grosset and F. Gherardi	2008	Conserving indigenous crayfish: stock assessment and habitat requirements in the threatened Austropotamobius italicus	Aquatic Conservation-Marine and Freshwater Ecosystems	ecological	regional	IT	negative
242	10.1016/j.biocon.2013.05.012	G. W. W. Wamelink, B. de Knegt, R. Pouwels, C. Schuiling, R. M. A. Wegman, A. M. Schmidt, H. F. van Dobben and M. E. Sanders	2013	Considerable environmental bottlenecks for species listed in the Habitats and Birds Directives in the Netherlands	Biological Conservation	ecological	national	NL	negative
243	10.1068/a45284	R. Beunen and K. van Assche	2013	Contested delineations: planning, law, and the governance of protected areas	Environment and Planning A	social and policies	national	NL	negative
244	10.1007/s10531-008-9480-7	A. Mazaris, J. Tzanopoulos, A. Kallimanis, Y. Matsinos, S. Sgardelis and J. Pantis	2008	The contribution of common and rare species to plant species richness patterns: the effect of habitat type and size of sampling unit	Biodiversity and Conservation	ecological	national	GR	positive
245	WOS:000303663000007	N. Grigoriadis, J. Petermann, E. Schroder and G. Spyroglou	2012	Contribution to the assessment of the conservation status of spruce forests in Greece	Journal of Biological Research-Thessaloniki	ecological	regional	GR	positive
246	10.1007/s10531-012-0354-7	F. Selvi and M. Valleri	2012	Cork oak woodlands in the north Tyrrhenian area (Italy): distribution and plant species diversity of a relict forest ecosystem	Biodiversity and Conservation	ecological	regional	IT	no opinion
247	10.1111/avsc.12020	D. K. Andersen, B. Nygaard, J. R. Fredshavn and R. Ejrnaes	2013	Cost-effective assessment of conservation status of fens	Applied Vegetation Science	ecological	national	DK	no opinion
249	WOS:000319956600008	C. Manzu, I. Gherghel, S. Zamfirescu, O. Zamfirescu, I. Rosca and A. Strugariu	2013	CURRENT AND FUTURE POTENTIAL DISTRIBUTION OF GLACIAL RELICT LIGULARIA SIBIRICA (ASTERACEAE) IN ROMANIA AND TEMPORAL CONTRIBUTION OF NATURA 2000 TO PROTECT THE SPECIES IN LIGHT OF GLOBAL CHANGE	Carpathian Journal of Earth and Environmental Sciences	ecological	national	RO	positive
250	WOS:000247461500005	H. I. Papaioannou and V. I. Kati	2007	Current status of the Balkan chamois (Rupicapra rupicapra balcanica) in Greece: Implications for conservation	Belgian Journal of Zoology	ecological	national	GR	negative
251	10.4404/hystrix-23.1-4548	V. Salvatori and A. D. Mertens	2012	Damage prevention methods in Europe: experiences from LIFE nature projects	Hystrix-Italian Journal of Mammalogy	ecological	multinational	PT, ES, FR, IT, HR	negative
253	10.1016/j.ecss.2004.02.005	M. J. Kaiser, M. Bergmann, H. Hinz, M. Galanidi, R. Shucksmith, E. I. S. Rees, T. Darbyshire and K. Ramsay	2004	Demersal fish and epifauna associated with sandbank habitats	Estuarine Coastal and Shelf Science	ecological	regional	UK	no opinion
254	10.1007/s10841-009-9250-1	M. Junker and T. Schmitt	2010	Demography, dispersal and movement pattern of Euphydryas aurinia (Lepidoptera: Nymphalidae) at the Iberian Peninsula: an alarming example in an increasingly fragmented landscape?	Journal of Insect Conservation	ecological	regional	ES	no opinion
255	10.1556/ComEc.11.2010.2.12	E. Santi, E. Mari, S. Piazzini, M. Renzi, G. Bacaro and S. Maccherini	2010	Dependence of animal diversity on plant diversity and environmental factors in farmland ponds	Community Ecology	ecological	regional	IT	negative
256	10.3354/meps09963	H. Corell, P. O. Moksnes, A. Engqvist, K. Doos and P. R. Jonsson	2012	Depth distribution of larvae critically affects their dispersal and the efficiency of marine protected areas	Marine Ecology Progress Series	ecological	multinational	DK, EE, LV, FI, DE, PL, SE, NO	negative
257	10.1111/j.1523-1739.2007.00829.x	M. Drechsler, K. Johst, C. Ohl and F. Watzold	2007	Designing cost-effective payments for conservation measures to generate spatiotemporal habitat heterogeneity	Conservation Biology	ecological	regional	DE	no opinion
258	10.1007/s10344-013-0741-8	N. Reid, M. G. Lundy, B. Hayden, D. Lynn, F. Marnell, R. A. McDonald and W. I. Montgomery	2013	Detecting detectability: identifying and correcting bias in binary wildlife surveys demonstrates their potential impact on conservation assessments	European Journal of Wildlife Research	ecological	national	IE	positive
259	10.1007/s00267-012-9856-z	A. Kafyri, T. Hovardas and K. Poirazidis	2012	Determinants of Visitor Pro-Environmental Intentions on Two Small Greek Islands: Is Ecotourism Possible at Coastal Protected Areas?	Environmental Management	social and policies	regional	GR	no opinion
260	WOS:000267369200002	M. P. Delgado, M. B. Morales, J. Traba and E. L. G. De la Morena	2009	Determining the effects of habitat management and climate on the population trends of a declining steppe bird	Ibis	ecological	regional	ES	no opinion
261	10.1658/1402-2001(2004)007[0071:dacfth]2.0.co;2	R. Ejrnaes, H. H. Bruun, E. Aude and E. Buchwald	2004	Developing a classifier for the habitats directive grassland types in Denmark using species lists for prediction	Applied Vegetation Science	ecological	regional	DK	negative
262	10.1002/aqc.1016	G. Porst and K. Irvine	2009	Distinctiveness of macroinvertebrate communities in turloughs (temporary ponds) and their response to environmental variables	Aquatic Conservation-Marine and Freshwater Ecosystems	ecological	regional	IE	negative
264	10.1051/kmae:2005014	E. Stloukal and M. Harvanekova	2005	Distribution of Austropotamobius torrentium (Decapoda : Astacidae) in Slovakia	Bulletin Francais De La Peche Et De La Pisciculture	ecological	national	SK	no opinion
265	10.1007/s10531-011-0031-2	F. Martinez-Hernandez, F. J. Perez-Garcia, J. A. Garrido-Becerra, A. J. Mendoza-Fernandez, J. M. Medina-Cazorla, M. I. Martinez-Nieto, M. E. M. Calvente and J. F. M. Poveda	2011	The distribution of Iberian gypsophilous flora as a criterion for conservation policy	Biodiversity and Conservation	ecological	national	ES	negative
266	10.1007/s10344-009-0254-7	P. Sastre, C. Ponce, C. Palacin, C. A. Martin and J. C. Alonso	2009	Disturbances to great bustards (Otis tarda) in central Spain: human activities, bird responses and management implications	European Journal of Wildlife Research	ecological	regional	ES	no opinion
267	10.1007/s12526-012-0139-y	J. Atalah, J. Fitch, J. Coughlan, J. Chopelet, I. Coscia and E. Farrell	2013	Diversity of demersal and megafaunal assemblages inhabiting sandbanks of the Irish Sea	Marine Biodiversity	ecological	regional	IE	positive
268	WOS:000272794100007	G. Michaelides and V. Kati	2009	Diversity patterns and conservation management of the lizard community in a Mediterranean reserve (Cyprus)	Journal of Biological Research-Thessaloniki	ecological	regional	CY	positive
269	10.1111/ddi.12104	D. Sanchez-Fernandez, P. Abellan, F. Picazo, A. Millan, I. Ribera and J. M. Lobo	2013	Do protected areas represent species' optimal climatic conditions? A test using Iberian water beetles	Diversity and Distributions	ecological	multinational	ES, PT	negative
270	10.5751/es-05847-180415	J. Morsing, S. I. Frandsen, H. Vejre and K. Raulund-Rasmussen	2013	Do the Principles of Ecological Restoration Cover EU LIFE Nature Cofunded Projects in Denmark?	Ecology and Society	social and policies	national	DK	positive
271	10.1111/j.1365-2664.2012.02198.x	H. L. Mossman, A. J. Davy and A. Grant	2012	Does managed coastal realignment create saltmarshes with 'equivalent biological characteristics' to natural reference sites?	Journal of Applied Ecology	ecological	regional	UK	no opinion
272	WOS:000285855600003	J. M. Medina-Cazorla, C. G. de Carrasco, M. E. Merlo, F. Martinez-Hernandez, J. A. Garrido-Becerra, E. Salmeron, A. J. Mendoza, F. J. Perez-Garcia and J. F. Mota	2010	The dolomite shrublands of the Convolvuletalia boissieri order and their preservation by means of the Habitats Directive	Acta Botanica Gallica	ecological	national	ES	mixed
273	10.1051/limn:2008009	I. Zacharias, A. Parasidoy, E. Bergmeier, G. Kehayias, E. Dimitriou and P. Dimopoulos	2008	A "DPSIR" model for Mediterranean temporary ponds: European, national and local scale comparisons	Annales De Limnologie-International Journal of Limnology	ecological	multinational	ES, PT, FR, IT, SI, HR, GR, CY	negative
274	10.1111/avsc.12021	S. Burrascano, I. Anzellotti, E. Carli, E. Del Vico, L. Facioni, F. Pretto, F. M. Sabatini, A. Tilia and C. Blasi	2013	Drivers of beta-diversity variation in Bromus erectus semi-natural dry grasslands	Applied Vegetation Science	ecological	regional	IT	no opinion
275	10.1007/s00035-009-0064-2	G. Brusa and B. E. L. Cerabolini	2009	Ecological factors affecting plant species and travertine deposition in petrifying springs from an Italian 'Natura 2000' site	Botanica Helvetica	ecological	regional	IT	no opinion
277	10.1016/j.jnc.2008.12.002	V. Kati, P. Dimopoulos, H. Papaioannou and K. Poirazidis	2009	Ecological management of a Mediterranean mountainous reserve (Pindos National Park, Greece) using the bird community as an indicator	Journal for Nature Conservation	ecological	regional	GR	negative
278	10.1016/j.envsci.2012.08.011	A. Funk, C. Gschopf, A. P. Blaschke, G. Weigelhofer and W. Reckendorfer	2013	Ecological niche models for the evaluation of management options in an urban floodplain-conservation vs. restoration purposes	Environmental Science & Policy	ecological	regional	AT	no opinion
279	10.1016/j.ecolecon.2004.12.007	J. Hiedanpaa	2005	The edges of conflict and consensus: a case for creativity in regional forest policy in Southwest Finland	Ecological Economics	social and policies	regional	FI	mixed
280	WOS:000309251900013	B. Juskiewicz-Swaczyna and D. Choszcz	2012	EFFECT OF HABITAT QUALITY ON THE STRUCTURE OF POPULATIONS OF PULSATILLA PATENS (L.) MILL. (RANUNCULACEAE) - RARE AND ENDANGERED SPECIES IN EUROPEAN FLORA	Polish Journal of Ecology	ecological	regional	PL	mixed
281	10.1016/j.landurbplan.2008.10.003	I. Petrosillo, N. Zaccarelli, T. Semeraro and G. Zurlini	2009	The effectiveness of different conservation policies on the security of natural capital	Landscape and Urban Planning	social and policies	regional	IT	mixed
282	WOS:000297566400005	T. Campedelli, G. T. Florenzano, G. Londi, S. Cutini and L. Fornasari	2010	EFFECTIVENESS OF THE ITALIAN NATIONAL PROTECTED AREAS SYSTEM IN CONSERVATION OF FARMLAND BIRDS: A GAP ANALYSIS	Ardeola	ecological	national	IT	negative
283	10.1111/acv.12025	F. Lison, J. A. Palazon and J. F. Calvo	2013	Effectiveness of the Natura 2000 Network for the conservation of cave-dwelling bats in a Mediterranean region	Animal Conservation	ecological	regional	ES	mixed
284	10.2193/2007-574	N. Klar, M. Herrmann and S. Kramer-Schadt	2009	Effects and Mitigation of Road Impacts on Individual Movement Behavior of Wildcats	Journal of Wildlife Management	ecological	regional	DE	mixed
285	10.1007/s11269-009-9453-y	E. Papastergiadou, I. Kagalou, K. Stefanidis, A. Retalis and I. Leonardos	2010	Effects of Anthropogenic Influences on the Trophic State, Land Uses and Aquatic Vegetation in a Shallow Mediterranean Lake: Implications for Restoration	Water Resources Management	ecological	regional	GR	negative
286	10.1007/s11258-008-9434-x	E. Farris and R. Filigheddu	2008	Effects of browsing in relation to vegetation cover on common yew (Taxus baccata L.) recruitment in Mediterranean environments	Plant Ecology	ecological	regional	IT	no opinion
287	10.1007/s10531-012-0398-8	N. Weiss, H. Zucchi and A. Hochkirch	2013	The effects of grassland management and aspect on Orthoptera diversity and abundance: site conditions are as important as management	Biodiversity and Conservation	ecological	regional	DE	no opinion
288	10.1007/s10336-013-0999-3	M. Immitzer, U. Nopp-Mayr and M. Zohmann	2014	Effects of habitat quality and hiking trails on the occurrence of Black Grouse (Tetrao tetrix L.) at the northern fringe of alpine distribution in Austria	Journal of Ornithology	ecological	regional	AT	mixed
289	10.1016/j.agee.2011.09.002	F. J. Gonzalez-Estebanez, S. Garcia-Tejero, P. Mateo-Tomas and P. P. Olea	2011	Effects of irrigation and landscape heterogeneity on butterfly diversity in Mediterranean farmlands	Agriculture Ecosystems & Environment	ecological	regional	ES	positive
290	10.1016/j.agee.2006.11.001	P. Skorka, J. Settele and M. Woyciechowski	2007	Effects of management cessation on grassland butterflies in southern Poland	Agriculture Ecosystems & Environment	ecological	regional	PL	positive
291	10.1007/s11273-008-9128-0	W. Ostendorp, T. Gretler, M. Mainberger, M. Peintinger and K. Schmieder	2009	Effects of mooring management on submerged vegetation, sediments and macro-invertebrates in Lake Constance, Germany	Wetlands Ecology and Management	ecological	regional	DE	no opinion
293	10.1016/j.jnc.2008.10.002	E. Farris, S. Pisanu, G. Ceccherelli and R. Filigheddu	2009	Effects of the management regime on the performance of the endangered Mediterranean Centaurea horrida Badaro (Asteraceae)	Journal for Nature Conservation	ecological	regional	IT	mixed
294	10.1016/j.envsci.2012.09.005	J. Kros, T. J. A. Gies, J. C. H. Voogd and W. de Vries	2013	Efficiency of agricultural measures to reduce nitrogen deposition in Natura 2000 sites	Environmental Science & Policy	social and policies	regional	NL	mixed
295	10.1111/2041-210x.12013	M. Lazarina, V. Sgardeli, A. S. Kallimanis and S. P. Sgardelis	2013	An effort-based index of beta diversity	Methods in Ecology and Evolution	ecological	national	GR	no opinion
296	10.1016/j.jenvman.2010.11.010	P. Christensen and L. Kornov	2011	EIA screening and nature protection in Denmark	Journal of Environmental Management	social and policies	national	DK	mixed
298	10.1007/s10531-011-0190-1	N. Gouix and H. Brustel	2012	Emergence trap, a new method to survey Limoniscus violaceus (Coleoptera: Elateridae) from hollow trees	Biodiversity and Conservation	ecological	regional	FR	positive
299	10.1111/j.1523-1739.2007.00880.x	J. Buse, T. Ranius and T. Assmann	2008	An endangered longhorn beetle associated with old oaks and its possible role as an ecosystem engineer	Conservation Biology	ecological	regional	DE	positive
300	10.1016/j.jnc.2010.01.004	J. Velazquez, R. Tejera, A. Hernando and M. V. Nunez	2010	Environmental diagnosis: Integrating biodiversity conservation in management of Natura 2000 forest spaces	Journal for Nature Conservation	ecological	regional	ES	no opinion
301	10.1080/09644016.2010.508302	T. Borzel and A. Buzogany	2010	Environmental organisations and the Europeanisation of public policy in Central and Eastern Europe: the case of biodiversity governance	Environmental Politics	social and policies	multinational	HU, PL, RO	positive
302	10.1016/j.crvi.2012.09.009	S. Fattorini, R. Santoro, E. Maurizi, A. T. R. Acosta and A. Di Giulio	2012	Environmental tuning of an insect ensemble: The tenebrionid beetles inhabiting a Mediterranean coastal dune zonation	Comptes Rendus Biologies	ecological	regional	IT	no opinion
303	10.1007/s13157-011-0165-8	M. Rudner	2011	Ephemeral Wetland Vegetation in Mediterranean Heathland and Maquis Communities	Wetlands	ecological	regional	ES	no opinion
304	10.1016/j.foreco.2010.05.016	J. Nascimbene, L. Marini and P. L. Nimis	2010	Epiphytic lichen diversity in old-growth and managed Picea abies stands in Alpine spruce forests	Forest Ecology and Management	ecological	regional	IT	no opinion
305	10.1016/j.ecolecon.2008.03.007	F. Watzold, N. Lienhoop, M. Drechsler and J. Settele	2008	Estimating optimal conservation in the context of agri-environmental schemes	Ecological Economics	ecological	regional	DE	negative
306	10.1007/s10531-006-9020-2	L. Godet, V. Devictor and F. Jiguet	2007	Estimating relative population size included within protected areas	Biodiversity and Conservation	ecological	national	FR	mixed
307	10.1007/s10592-013-0461-3	E. Solano, E. Mancini, P. Ciucci, F. Mason, P. Audisio and G. Antonini	2013	The EU protected taxon Morimus funereus Mulsant, 1862 (Coleoptera: Cerambycidae) and its western Palaearctic allies: systematics and conservation outcomes	Conservation Genetics	ecological	multinational	IT, SI, HR, ME, GR	negative
308	10.1111/conl.12006	A. Hochkirch, T. Schmitt, J. Beninde, M. Hiery, T. Kinitz, J. Kirschey, D. Matenaar, K. Rohde, A. Stoefen, N. Wagner, A. Zink, S. Lotters, M. Veith and A. Proelss	2013	Europe Needs a New Vision for a Natura 2020 Network	Conservation Letters	social and policies	European	EU27	negative
309	10.1016/s0075-9511(04)80016-1	K. Schmieder	2004	European lake shores in danger - concepts for a sustainable development	Limnologica	ecological	multinational	DE, CH, AT	no opinion
310	10.1111/j.1526-100X.2009.00566.x	J. Keulartz	2009	European Nature Conservation and Restoration Policy-Problems and Perspectives	Restoration Ecology	social and policies	European	EU27	mixed
311	10.1080/11263504.2012.748101	J. Nascimbene, P. L. Nimis and S. Ravera	2013	Evaluating the conservation status of epiphytic lichens of Italy: A red list	Plant Biosystems	ecological	national	IT	negative
312	10.1016/j.jag.2012.01.002	J. C. W. Chan, P. Beckers, T. Spanhove and J. Vanden Borre	2012	An evaluation of ensemble classifiers for mapping Natura 2000 heathland in Belgium using spaceborne angular hyperspectral (CHRIS/Proba) imagery	International Journal of Applied Earth Observation and Geoinformation	ecological	regional	BE	no opinion
313	10.1016/s0006-3207(01)00113-6	M. B. Garcia, D. Guzman and D. Goni	2002	An evaluation of the status of five threatened plant species in the Pyrenees	Biological Conservation	ecological	regional	ES	mixed
314	10.1016/j.landusepol.2003.09.010	J. Prazan, T. Ratinger and V. Krumalova	2005	The evolution of nature conservation policy in the Czech Republic - challenges of europeanisation in the White Carpathians Protected Landscape Area	Land Use Policy	social and policies	regional	CZ	negative
315	WOS:000262957700008	E. Vela, P. Auda, J. F. Leger, V. Goncalves and A. Baumel	2008	Example of a new evaluation of threat status according to the IUCN criteria 3.1: the case of the Provencal endemic Arenaria provincialls Chater & Halliday (Caryophyllaceae)	Acta Botanica Gallica	ecological	regional	FR	negative
316	10.1111/j.1474-919X.2008.00889.x	T. E. Holm and K. Laursen	2009	Experimental disturbance by walkers affects behaviour and territory density of nesting Black-tailed Godwit Limosa limosa	Ibis	ecological	regional	DK	positive
317	10.5751/es-05085-170318	I. D. Soane, R. Scolozzi, A. Gretter and K. Hubacek	2012	Exploring Panarchy in Alpine Grasslands: an Application of Adaptive Cycle Concepts to the Conservation of a Cultural Landscape	Ecology and Society	ecological	regional	IT	no opinion
318	10.1007/s10336-012-0895-2	M. V. Jimenez-Franco, J. E. Martinez, I. Pagan and J. F. Calvo	2013	Factors determining territory fidelity in a migratory forest raptor, the Booted Eagle Hieraaetus pennatus	Journal of Ornithology	ecological	regional	ES	no opinion
319	10.1007/s10531-010-9894-x	E. Dias and C. Melo	2010	Factors influencing the distribution of Azorean mountain vegetation: implications for nature conservation	Biodiversity and Conservation	ecological	regional	PT	no opinion
320	10.1016/j.landusepol.2013.08.009	H. Wustemann, J. Meyerhoff, M. Ruhs, A. Schafer and V. Hartje	2014	Financial costs and benefits of a program of measures to implement a National Strategy on Biological Diversity in Germany	Land Use Policy	social and policies	national	DE	no opinion
321	WOS:000313998400006	K. Weingarth, C. Heibl, F. Knauer, F. Zimmermann, L. Bufka and M. Heurich	2012	First estimation of Eurasian lynx (Lynx lynx) abundance and density using digital cameras and capture-recapture techniques in a German national park	Animal Biodiversity and Conservation	ecological	regional	DE	no opinion
322	10.1109/jstars.2013.2241735	I. Ali, C. Schuster, M. Zebisch, M. Forster, B. Kleinschmit and C. Notarnicola	2013	First Results of Monitoring Nature Conservation Sites in Alpine Region by Using Very High Resolution (VHR) X-Band SAR Data	Ieee Journal of Selected Topics in Applied Earth Observations and Remote Sensing	ecological	regional	IT	no opinion
323	10.1007/s10531-005-2431-7	C. Mony, J. F. Mony, G. Thiebaut and S. Muller	2006	Floristic and ecological diversity of Ranunculus aquatic habitats in the sub-Atlantic range: implications for conservation	Biodiversity and Conservation	ecological	regional	FR	mixed
324	10.1016/j.jnc.2011.08.003	R. Santoro, M. Carboni, M. L. Carranza and A. T. R. Acosta	2012	Focal species diversity patterns can provide diagnostic information on plant invasions	Journal for Nature Conservation	ecological	regional	IT	no opinion
325	WOS:000260115400009	M. Jurc, N. Ogris, R. Pavlin and D. Borkovic	2008	FOREST AS A HABITAT OF SAPROXYLIC BEETLES ON NATURA 2000 SITES IN SLOVENIA	Revue D Ecologie-La Terre Et La Vie	ecological	national	SI	mixed
326	10.1007/s10531-012-0380-5	R. Benesperi, C. Giuliani, S. Zanetti, M. Gennai, M. M. Lippi, T. Guidi, J. Nascimbene and B. Foggi	2012	Forest plant diversity is threatened by Robinia pseudoacacia (black-locust) invasion	Biodiversity and Conservation	ecological	regional	IT	no opinion
327	10.1007/s10342-011-0517-1	F. Carbone	2012	Forestry indemnity: a regional case study	European Journal of Forest Research	social and policies	national	IT	no opinion
328	WOS:000272948500005	J. Paal	2009	The forests of the North-Estonian Klint; the north-easternmost representatives of the EU Habitat Directive Tilio-Acerion forests of slopes, screes and ravines	Annales Botanici Fennici	ecological	regional	EE	positive
329	10.1016/j.eiar.2013.06.005	P. M. Thompson, G. D. Hastie, J. Nedwell, R. Barham, K. L. Brookes, L. S. Cordes, H. Bailey and N. McLean	2013	Framework for assessing impacts of pile-driving noise from offshore wind farm construction on a harbour seal population	Environmental Impact Assessment Review	ecological	regional	UK	negative
330	10.1111/conl.12012	J. C. Young, A. Jordan, K. R. Searle, A. Butler, P. Simmons and A. D. Watt	2013	Framing scale in participatory biodiversity management may contribute to more sustainable solutions	Conservation Letters	social and policies	regional	UK	no opinion
331	10.1016/j.landusepol.2012.08.010	G. Ioppolo, G. Saija and R. Salomone	2013	From coastal management to environmental management: The sustainable eco-tourism program for the mid-western coast of Sardinia (Italy)	Land Use Policy	social and policies	regional	IT	no opinion
332	10.1080/11263504.2013.860055	S. Bagella, M. C. Caria and R. Filigheddu	2013	Gap analysis revealed a low efficiency of Natura 2000 network for the conservation of endemic species in Mediterranean temporary freshwater habitats	Plant Biosystems	ecological	regional	IT	negative
333	10.1007/s10592-009-9879-z	T. Dostalek, Z. Munzbergova and I. Plackova	2010	Genetic diversity and its effect on fitness in an endangered plant species, Dracocephalum austriacum L	Conservation Genetics	ecological	multinational	CZ, SK	mixed
334	10.1007/s10592-008-9606-1	A. Matern, K. Desender, C. Drees, E. Gaublomme, W. G. Paill and T. Assmann	2009	Genetic diversity and population structure of the endangered insect species Carabus variolosus in its western distribution range: Implications for conservation	Conservation Genetics	ecological	multinational	DE, FR, SI, AT,	no opinion
335	10.1007/s10531-010-9872-3	E. Bergmeier, J. Petermann and E. Schroder	2010	Geobotanical survey of wood-pasture habitats in Europe: diversity, threats and conservation	Biodiversity and Conservation	ecological	European	EUGeo	mixed
336	10.1007/s13157-011-0179-2	J. E. Moeslund, L. Arge, P. K. Bocher, B. Nygaard and J. C. Svenning	2011	Geographically Comprehensive Assessment of Salt-Meadow Vegetation-Elevation Relations Using LiDAR	Wetlands	ecological	national	DK	no opinion
337	10.1007/s10531-011-0054-8	G. Bacaro, E. Santi, D. Rocchini, F. Pezzo, L. Puglisi and A. Chiarucci	2011	Geostatistical modelling of regional bird species richness: exploring environmental proxies for conservation purpose	Biodiversity and Conservation	ecological	regional	IT	no opinion
338	10.1016/j.landurbplan.2004.09.041	C. von Haaren and M. Reich	2006	The German way to greenways and habitat networks	Landscape and Urban Planning	ecological	national	DE	negative
339	10.1016/j.biocon.2004.04.018	A. Vanderpoorten, A. Sotiaux and P. Engels	2005	A GIS-based survey for the conservation of bryophytes at the landscape scale	Biological Conservation	ecological	regional	BE	no opinion
340	WOS:000275881500016	B. Prajs and W. Antkowiak	2010	Grassland Ecosystems in the Varied Hydrological and Ecological Conditions of the Kulawa River Valley	Polish Journal of Environmental Studies	ecological	regional	PL	negative
341	WOS:000276684900010	J. Martincova and L. Ondrasek	2010	Grassland Monitoring of Meadows in the Region around Banska Bystrica	Czech Journal of Genetics and Plant Breeding	ecological	regional	SK	no opinion
342	10.1007/s10531-011-0112-2	A. D. Papanikolaou, N. M. Fyllas, A. D. Mazaris, P. G. Dimitrakopoulos, A. S. Kallimanis and J. D. Pantis	2011	Grazing effects on plant functional group diversity in Mediterranean shrublands	Biodiversity and Conservation	ecological	national	GR	positive
343	10.1080/11263500802709772	N. Grigoriadis, A. Panagopoulos, I. Meliadis, G. Spyroglou and S. Stathaki	2009	Habitat and hydrological-hydrochemical characteristics of the Agras wetland (Northern Greece)	Plant Biosystems	ecological	regional	GR	no opinion
344	10.1007/s10841-009-9227-0	M. Laaksonen, K. Murdoch, J. Siitonen and G. Varkonyi	2010	Habitat associations of Agathidium pulchellum, an endangered old-growth forest beetle species living on slime moulds	Journal of Insect Conservation	ecological	regional	FI	positive
345	10.1016/j.ecss.2007.10.026	M. F. Carreno, M. A. Esteve, J. Martinez, J. A. Palazon and M. T. Pardo	2008	Habitat changes in coastal wetlands associated to hydrological changes in the watershed	Estuarine Coastal and Shelf Science	ecological	regional	ES	no opinion
346	10.5697/oc.55-1.167	J. M. Weslawski, L. Kryla-Straszewska, J. Piwowarczyk, J. Urbanski, J. Warzocha, L. Kotwicki, M. Wlodarska-Kowalczuk and J. Wiktor	2013	Habitat modelling limitations - Puck Bay, Baltic Sea - a case study	Oceanologia	ecological	regional	PL	no opinion
347	10.1007/s10531-008-9395-3	S. Lengyel, E. Deri, Z. Varga, R. Horvath, B. Tothmeresz, P. Y. Henry, A. Kobler, L. Kutnar, V. Babij, A. Seliskar, C. Christia, E. Papastergiadou, B. Gruber and K. Henle	2008	Habitat monitoring in Europe: a description of current practices	Biodiversity and Conservation	social and policies	European	EU25	no opinion
348	10.1016/j.jenvman.2013.06.022	G. Maffey, M. Reed, R. J. Irvine and R. van der Wal	2013	Habitat monitoring in the wider countryside: A case study on the pursuit of innovation in red deer management	Journal of Environmental Management	ecological	national	GB	mixed
349	WOS:000275270000010	J. Horak, E. Vavrova and K. Chobot	2010	Habitat preferences influencing populations, distribution and conservation of the endangered saproxylic beetle Cucujus cinnaberinus (Coleoptera: Cucujidae) at the landscape level	European Journal of Entomology	ecological	regional	CZ	mixed
351	10.1007/s10531-004-8226-4	J. D. Anadon, A. Gimenez, I. Perez, M. Martinez and M. A. Esteve	2006	Habitat selection by the spur-thighed tortoise Testudo graeca in a multisuccessional landscape: Implications for habitat management	Biodiversity and Conservation	ecological	regional	ES	no opinion
352	10.1016/j.biocon.2007.10.004	N. Klar, N. Fernandez, S. Kramer-Schadt, M. Herrmann, M. Trinzen, I. Buttner and C. Niemitz	2008	Habitat selection models for European wildcat conservation	Biological Conservation	ecological	regional	DE	positive
353	10.1007/s10531-011-0005-4	E. G. Drakou, A. S. Kallimanis, A. D. Mazaris, E. Apostolopoulou and J. D. Pantis	2011	Habitat type richness associations with environmental variables: a case study in the Greek Natura 2000 aquatic ecosystems	Biodiversity and Conservation	ecological	national	GR	positive
354	10.1007/s10531-006-9053-6	J. E. Martinez, I. Pagan, J. A. Palazon and J. F. Calvo	2007	Habitat use of booted eagles (Hieraaetus pennatus) in a special protection area: Implications for conservation	Biodiversity and Conservation	ecological	regional	ES	mixed
355	10.1016/j.biocon.2005.09.032	J. Seoane, J. H. Justribo, F. Garcia, J. Retamar, C. Rabadan and J. C. Atienza	2006	Habitat-suitability modelling to assess the effects of land-use changes on Dupont's lark Chersophilus duponti: A case study in the Layna Important Bird Area	Biological Conservation	ecological	regional	ES	mixed
356	10.1016/j.envsoft.2010.03.011	A. Marcer, V. Garcia, A. Escobar and X. Pons	2010	Handling historical information on protected-area systems and coverage. An information system for the Natura 2000 European context	Environmental Modelling & Software	social and policies	regional	ES	positive
357	10.1007/s10531-012-0375-2	K. Kanongdate, M. Schmidt, R. Krawczynski and G. Wiegleb	2012	Has implementation of the precautionary principle failed to prevent biodiversity loss at the national level?	Biodiversity and Conservation	social and policies	national	DE	mixed
358	10.1016/j.rse.2012.08.029	S. Delalieux, B. Somers, B. Haest, T. Spanhove, J. Vanden Borre and C. A. Mucher	2012	Heathland conservation status mapping through integration of hyperspectral mixture analysis and decision tree classifiers	Remote Sensing of Environment	ecological	regional	BE	no opinion
359	10.1007/s00267-012-9820-y	B. Pinto and M. Partidario	2012	The History of the Establishment and Management Philosophies of the Portuguese Protected Areas: Combining Written Records and Oral History	Environmental Management	ecological	national	PT	positive
360	10.1111/j.1466-8238.2008.00393.x	A. S. Kallimanis, A. D. Mazaris, J. Tzanopoulos, J. M. Halley, J. D. Pantis and S. P. Sgardelis	2008	How does habitat diversity affect the species-area relationship?	Global Ecology and Biogeography	ecological	national	GR	no opinion
361	10.1016/j.jembe.2008.07.015	S. Fraschetti, A. Terlizzi and F. Boero	2008	How many habitats are there in the sea (and where)?	Journal of Experimental Marine Biology and Ecology	social and policies	national	IT	no opinion
362	10.1111/conl.12037	A. Hochkirch, T. Schmitt, J. Beninde, M. Hiery, T. Kinitz, J. Kirschey, D. Matenaar, K. Rohde, A. Stoefen, N. Wagner, A. Zink, S. Lotters, M. Veith and A. Proelss	2013	How Much Biodiversity does Natura 2000 Cover?	Conservation Letters	social and policies	European	EU27	mixed
363	10.1007/s10841-007-9092-7	M. Konvicka, J. Benes, O. Cizek, F. Kopecek, O. Konvicka and L. Vitaz	2008	How too much care kills species: Grassland reserves, agri-environmental schemes and extinction of Colias myrmidone (Lepidoptera : Pieridae) from its former stronghold	Journal of Insect Conservation	ecological	regional	CZ	mixed
364	10.1007/s00267-013-0036-6	M. A. Tsiafouli, E. Apostolopoulou, A. D. Mazaris, A. S. Kallimanis, E. G. Drakou and J. D. Pantis	2013	Human Activities in Natura 2000 Sites: A Highly Diversified Conservation Network	Environmental Management	social and policies	European	EU27	negative
365	10.1007/s00267-013-0081-1	R. Benesperi, L. Lastrucci and J. Nascimbene	2013	Human Disturbance Threats the Red-Listed Macrolichen Seirophora villosa (Ach.) Frod,n in Coastal Juniperus Habitats: Evidence From Western Peninsular Italy	Environmental Management	ecological	regional	IT	no opinion
366	10.1007/s10841-005-2642-y	V. Kati, P. Mani, O. von Helversen, F. Willemse, N. Elsner and P. Dirnopoulos	2006	Human land use threatens endemic wetland species: the case of Chorthippus lacustris (La Greca and Messina 1975) (Orthoptera : Acrididae) in Epirus, Greece	Journal of Insect Conservation	ecological	regional	GR	positive
367	10.1080/11263504.2013.861540	E. Farris, S. Pisanu, G. Ceccherelli and R. Filigheddu	2013	Human trampling effects on Mediterranean coastal dune plants	Plant Biosystems	ecological	regional	IT	no opinion
368	10.1111/j.1523-1739.2012.01965.x	L. Laikre, M. Jansson, F. W. Allendorf, S. Jakobsson and N. Ryman	2013	Hunting Effects on Favourable Conservation Status of Highly Inbred Swedish Wolves	Conservation Biology	ecological	national	SE	no opinion
370	10.1007/s10531-008-9557-3	S. Tsiftsis, I. Tsiripidis and V. Karagiannakidou	2009	Identifying areas of high importance for orchid conservation in east Macedonia (NE Greece)	Biodiversity and Conservation	ecological	regional	GR	negative
371	10.1016/j.mcm.2009.08.009	E. Dimitriou and I. Zacharias	2010	Identifying microclimatic, hydrologic and land use impacts on a protected wetland area by using statistical models and GIS techniques	Mathematical and Computer Modelling	ecological	regional	GR	no opinion
373	10.1016/j.biocon.2013.06.021	M. A. Tsianou, A. D. Mazaris, A. S. Kallimanis, P. S. K. Deligioridi, E. Apostolopoulou and J. D. Pantis	2013	Identifying the criteria underlying the political decision for the prioritization of the Greek Natura 2000 conservation network	Biological Conservation	ecological	national	GR	positive
374	10.1016/j.envsci.2009.04.006	P. F. M. Opdam, M. E. A. Broekmeyer and F. H. Kistenkas	2009	Identifying uncertainties in judging the significance of human impacts on Natura 2000 sites	Environmental Science & Policy	social and policies	European	EU25	no opinion
375	10.1127/1432-8364/2013/0188	O. Buck, A. Klink, V. G. Millan, K. Pakzad and A. Muterthies	2013	Image Analysis Methods to Monitor Natura 2000 Habitats at Regional Scales - the MS.MONINA State Service Example in Schleswig-Holstein, Germany	Photogrammetrie Fernerkundung Geoinformation	ecological	regional	DE	no opinion
376	10.1016/j.ecolecon.2010.07.013	N. Roeder, D. Lederbogen, J. Trautner, A. Bergamini, S. Stofer and C. Scheidegger	2010	The impact of changing agricultural policies on jointly used rough pastures in the Bavarian Pre-Alps: An economic and ecological scenario approach	Ecological Economics	social and policies	regional	DE	negative
377	10.1111/j.1365-2664.2009.01760.x	P. W. Atkinson, I. M. Maclean and N. A. Clark	2010	Impacts of shellfisheries and nutrient inputs on waterbird communities in the Wash, England	Journal of Applied Ecology	ecological	regional	UK	negative
378	10.1016/j.limno.2013.10.004	L. Denys, J. Van Wichelen, J. Packet and G. Louette	2014	Implementing ecological potential of lakes for the Water Framework Directive-Approach in Flanders (northern Belgium)	Limnologica	ecological	regional	BE	no opinion
379	10.1111/j.1752-4598.2012.00200.x	J. Muller, J. Brunet, A. Brin, C. Bouget, H. Brustel, H. Bussler, B. Forster, G. Isacsson, F. Kohler, T. Lachat and M. M. Gossner	2013	Implications from large-scale spatial diversity patterns of saproxylic beetles for the conservation of European Beech forests	Insect Conservation and Diversity	ecological	multinational	DE, SE, CH, FR, UA	positive
380	10.1007/s10750-009-9971-x	G. Porst and K. Irvine	2009	Implications of the spatial variability of macroinvertebrate communities for monitoring of ephemeral lakes. An example from turloughs	Hydrobiologia	ecological	regional	IE	no opinion
381	10.1016/j.jnc.2012.03.003	N. Faria, J. E. Rabaca and M. B. Morales	2012	The importance of grazing regime in the provision of breeding habitat for grassland birds: The case of the endangered little bustard (Tetrax tetrax)	Journal for Nature Conservation	ecological	regional	PT	negative
382	10.1023/B:BIOC.0000040004.63826.fb	D. Bonte, P. Criel, L. Vanhoutte, I. Van Thournout and J. P. Maelfait	2004	The importance of habitat productivity, stability and heterogeneity for spider species richness in coastal grey dunes along the North Sea and its implications for conservation	Biodiversity and Conservation	ecological	multinational	FR, BE, NL	no opinion
383	10.1111/j.1752-4598.2011.00146.x	P. Pokluda, D. Hauck and L. Cizek	2012	Importance of marginal habitats for grassland diversity: fallows and overgrown tall-grass steppe as key habitats of endangered ground-beetle Carabus hungaricus	Insect Conservation and Diversity	ecological	regional	CZ	negative
384	10.1111/j.1466-8238.2008.00428.x	D. Marage and J. C. Gegout	2009	Importance of soil nutrients in the distribution of forest communities on a large geographical scale	Global Ecology and Biogeography	ecological	regional	FR	mixed
385	10.1016/j.biocon.2010.08.019	C. Blasi, M. Marignani, R. Copiz, M. Fipaldini, S. Bonacquisti, E. Del Vico, L. Rosati and L. Zavattero	2011	Important Plant Areas in Italy: From data to mapping	Biological Conservation	ecological	national	IT	positive
386	10.1016/j.biocon.2013.01.018	A. Arponen, R. K. Heikkinen, R. Paloniemi, J. Poyry, J. Simila and M. Kuussaari	2013	Improving conservation planning for semi-natural grasslands: Integrating connectivity into agri-environment schemes	Biological Conservation	ecological	regional	FI	negative
387	10.1002/eet.1623	C. Klassert and S. Mockel	2013	Improving the Policy Mix: The Scope for Market-Based Instruments in EU Biodiversity Policy	Environmental Policy and Governance	social and policies	European	EU27	mixed
388	10.1007/s12224-012-9150-0	H. S. Fischer, S. Winter, E. Lohberger, H. Jehl and A. Fischer	2013	Improving Transboundary Maps of Potential Natural Vegetation Using Statistical Modeling Based on Environmental Predictors	Folia Geobotanica	ecological	multinational	DE, CZ	no opinion
389	10.1017/s0376892900000291	M. Rekola, E. Pouta, J. Kuuluvainen, O. Tahvonen and C. Z. Li	2000	Incommensurable preferences in contingent valuation: the case of Natura 2000 Network in Finland	Environmental Conservation	social and policies	national	FI	negative
390	10.1007/s00267-010-9575-2	V. Oikonomou, P. G. Dimitrakopoulos and A. Y. Troumbis	2011	Incorporating Ecosystem Function Concept in Environmental Planning and Decision Making by Means of Multi-Criteria Evaluation: The Case-Study of Kalloni, Lesbos, Greece	Environmental Management	social and policies	regional	GR	negative
391	10.1111/j.1474-919X.2007.00776.x	T. Grava, N. Mathevon, E. Place and P. Balluet	2008	Individual acoustic monitoring of the European Eagle Owl Bubo bubo	Ibis	ecological	regional	FR	no opinion
392	10.1016/j.biocon.2012.09.012	A. Santangeli, R. Wistbacka, I. K. Hanski and T. Laaksonen	2013	Ineffective enforced legislation for nature conservation: A case study with Siberian flying squirrel and forestry in a boreal landscape	Biological Conservation	ecological	regional	FI	negative
393	WOS:000289577100007	M. Lik	2010	The influence of habitat type on the population dynamics of ground beetles (Coleoptera: Carabidae) in marshland	Annales De La Societe Entomologique De France	ecological	regional	PL	no opinion
394	10.1007/s11284-008-0538-5	A. Galantinho and A. Mira	2009	The influence of human, livestock, and ecological features on the occurrence of genet (Genetta genetta): a case study on Mediterranean farmland	Ecological Research	ecological	regional	PT	no opinion
395	10.12657/denbio.071.005	T. H. Szymura, M. Szymura and M. Pietrzak	2014	Influence of land relief and soil properties on stand structure of overgrown oak forests of coppice origin with Sorbus torminalis	Dendrobiology	ecological	regional	PL	negative
396	10.1016/j.biocon.2012.11.013	A. F. Ferreira, B. R. Quintella, C. Maia, C. S. Mateus, C. M. Alexandre, C. Capinha and P. R. Almeida	2013	Influence of macrohabitat preferences on the distribution of European brook and river lampreys: Implications for conservation and management	Biological Conservation	ecological	national	PT	positive
397	10.1016/s1389-9341(01)00070-3	N. Weber and T. Christophersen	2002	The influence of non-governmental organisations on the creation of Natura 2000 during the European Policy process	Forest Policy and Economics	social and policies	national	DE	negative
398	10.1016/j.agee.2012.02.006	M. T. Sebastia, M. Rodilla, J. A. Sanchis, V. Altur, I. Gadea and S. Falco	2012	Influence of nutrient inputs from a wetland dominated by agriculture on the phytoplankton community in a shallow harbour at the Spanish Mediterranean coast	Agriculture Ecosystems & Environment	ecological	regional	ES	positive
399	10.1111/jbi.12182	V. Amici, E. Santi, G. Filibeck, M. Diekmann, F. Geri, S. Landi, A. Scoppola and A. Chiarucci	2013	Influence of secondary forest succession on plant diversity patterns in a Mediterranean landscape	Journal of Biogeography	ecological	regional	IT	no opinion
400	10.1016/j.envpol.2011.01.033	J. Kros, K. F. A. Frumau, A. Hensen and W. de Vries	2011	Integrated analysis of the effects of agricultural management on nitrogen fluxes at landscape scale	Environmental Pollution	ecological	regional	NL	positive
401	10.1016/j.actao.2011.02.007	M. Andreou, P. Delipetrou, C. Kadis, G. Tsiamis, K. Bourtzis and K. Georghiou	2011	An integrated approach for the conservation of threatened plants: The case of Arabis kennedyae (Brassicaceae)	Acta Oecologica-International Journal of Ecology	ecological	regional	GR	no opinion
402	10.1016/j.envsci.2009.01.001	A. Piorr, F. Ungaro, A. Ciancaglini, K. Happe, A. Sahrbacher, C. Sattler, S. Uthes and P. Zander	2009	Integrated assessment of future CAP policies: land use changes, spatial patterns and targeting	Environmental Science & Policy	social and policies	multinational	DE, IT	negative
403	10.1080/09640568.2010.537544	B. Zanon and D. Geneletti	2011	Integrating ecological, scenic and local identity values in the management plan of an Alpine Natural Park	Journal of Environmental Planning and Management	ecological	regional	IT	negative
404	WOS:000285855600010	E. Biondi, S. Casavecchia and S. Pesaresi	2010	Interpretation and management of the forest habitats of the Italian peninsula	Acta Botanica Gallica	ecological	national	IT	positive
405	10.1007/s10750-012-1170-5	Z. Horvath, M. Ferenczi, A. Mora, C. F. Vad, A. Ambrus, L. Forro, G. Szovenyi and S. Andrikovics	2012	Invertebrate food sources for waterbirds provided by the reconstructed wetland of Nyirkai-Hany, northwestern Hungary	Hydrobiologia	ecological	regional	HU	no opinion
406	10.1016/j.landusepol.2006.04.004	M. Visser, J. Moran, E. Regan, M. Gormally and M. S. Skeffington	2007	The Irish agri-environment: How turlough users and non-users view converging EU agendas of Natura 2000 and CAP	Land Use Policy	social and policies	regional	IE	no opinion
407	WOS:000294140300014	E. Milios, P. Petrou, E. Andreou and E. Pipinis	2011	Is facilitation the dominant process in the regeneration of the Juniperus excelsa M. Bieb. stands in Cyprus?	Journal of Biological Research-Thessaloniki	ecological	regional	CY	negative
408	10.1177/0959683608100567	A. Obidzinski, M. Kloss and A. Cedro	2009	Is spontaneous regeneration of raised mire vegetation possible? A case study of the 'Czarne Bagno' mire in the Bystrzyckie Hills, southern Poland	Holocene	ecological	regional	PL	no opinion
409	10.1016/j.biocon.2013.06.019	O. Opermanis, B. MacSharry, D. Evans and Z. Sipkova	2013	Is the connectivity of the Natura 2000 network better across internal or external administrative borders?	Biological Conservation	ecological	multinational	DE, IT, ES, AT	negative
410	10.1111/j.1442-1984.2008.00212.x	S. Burmeier and K. Jensen	2008	Is the endangered Apium repens (Jacq.) Lag. rare because of a narrow regeneration niche?	Plant Species Biology	ecological	regional	DE	no opinion
411	10.1080/13501760802662847	R. Slepcevic	2009	The judicial enforcement of EU law through national courts: possibilities and limits	Journal of European Public Policy	social and policies	multinational	FR, DE, NL	negative
412	10.1080/00222933.2011.651639	N. Gouix, J. Mertlik, A. Jarzabek-Muller, T. Nemeth and H. Brustel	2012	Known status of the endangered western Palaearctic violet click beetle (Limoniscus violaceus) (Coleoptera)	Journal of Natural History	ecological	European	EU27	mixed
413	10.1002/aqc.673	R. Wingfield, K. Murphy and M. Gaywood	2005	Lake habitat suitability for the rare European macrophyte Najas flexilis (Willd.) Rostk. & Schmidt	Aquatic Conservation-Marine and Freshwater Ecosystems	ecological	multinational	UK, IE	no opinion
414	10.1016/j.foreco.2012.08.013	N. Oikonomakis and P. Ganatsas	2012	Land cover changes and forest succession trends in a site of Natura 2000 network (Elatia forest), in northern Greece	Forest Ecology and Management	ecological	regional	GR	mixed
417	10.1016/j.ecolind.2008.12.006	L. Spitzer, J. Benes, J. Dandova, V. Jaskova and M. Konvicka	2009	The Large Blue butterfly, Phengaris Maculinea arion, as a conservation umbrella on a landscape scale: The case of the Czech Carpathians	Ecological Indicators	ecological	regional	CZ	positive
418	10.1111/j.1365-2494.2011.00810.x	G. Parolo, T. Abeli, F. Gusmeroli and G. Rossi	2011	Large-scale heterogeneous cattle grazing affects plant diversity and forage value of Alpine species-rich Nardus pastures	Grass and Forage Science	ecological	regional	IT	mixed
419	10.1111/j.1467-9221.2011.00863.x	P. Castro	2012	Legal Innovation for Social Change: Exploring Change and Resistance to Different Types of Sustainability Laws	Political Psychology	social and policies	national	PT	mixed
421	10.1093/jel/eqs015	S. Borgstrom	2012	Legitimacy Issues in Finnish Wolf Conservation	Journal of Environmental Law	social and policies	national	FI	mixed
422	WOS:000316959900001	E. Marabuto, P. Pires and M. F. V. Corley	2013	The Lepidoptera of Parque Natural do Tejo Internacional, Portugal (Insecta: Lepidoptera)	Shilap-Revista De Lepidopterologia	ecological	regional	PT	no opinion
423	10.1007/s10531-010-9959-x	C. Bassler, J. Stadler, J. Muller, B. Forster, A. Gottlein and R. Brandl	2011	LiDAR as a rapid tool to predict forest habitat types in Natura 2000 networks	Biodiversity and Conservation	ecological	regional	DE	no opinion
424	10.1007/s10980-012-9704-9	D. Alagador, M. Trivino, J. O. Cerdeira, R. Bras, M. Cabeza and M. B. Araujo	2012	Linking like with like: optimising connectivity between environmentally-similar habitats	Landscape Ecology	ecological	multinational	ES, PT	no opinion
425	10.1016/j.envsci.2010.11.005	H. O. Fock, M. Kloppmann and V. Stelzenmuller	2011	Linking marine fisheries to environmental objectives: a case study on seafloor integrity under European maritime policies	Environmental Science & Policy	social and policies	regional	DE	positive
426	10.1016/j.jnc.2011.07.001	V. Nunez, A. Hernando, J. Velazquez and R. Tejera	2012	Livestock management in Natura 2000: A case study in a Quercus pyrenaica neglected coppice forest	Journal for Nature Conservation	ecological	regional	ES	no opinion
427	10.1002/casp.1025	C. Mouro and P. Castro	2010	Local Communities Responding to Ecological Challenges-A Psycho-social Approach to the Natura 2000 Network	Journal of Community & Applied Social Psychology	social and policies	regional	PT	negative
428	10.1046/j.1365-2664.2001.00571.x	P. M. Thompson, S. Van Parijs and K. M. Kovacs	2001	Local declines in the abundance of harbour seals: implications for the designation and monitoring of protected areas	Journal of Applied Ecology	ecological	regional	UK	negative
429	10.1111/j.1365-2664.2012.02175.x	T. E. Murray, U. Fitzpatrick, A. Byrne, R. Fealy, M. J. F. Brown and R. J. Paxton	2012	Local-scale factors structure wild bee communities in protected areas	Journal of Applied Ecology	ecological	regional	IE	mixed
430	10.1007/s10531-008-9470-9	R. Juskaitis	2008	Long-term common dormouse monitoring: effects of forest management on abundance	Biodiversity and Conservation	ecological	regional	LT	no opinion
431	10.1007/s10750-011-0927-6	D. Carss, B. M. Spears, L. Quinn and R. Cooper	2012	Long-term variations in waterfowl populations in Loch Leven: identifying discontinuities between local and national trends	Hydrobiologia	ecological	regional	UK	mixed
432	10.1007/s10531-012-0283-5	M. Marignani and C. Blasi	2012	Looking for important plant areas: selection based on criteria, complementarity, or both?	Biodiversity and Conservation	ecological	national	IT	no opinion
433	10.1080/11263504.2013.772080	M. M. Azzella, M. Iberite, S. Fascetti and L. Rosati	2013	Loss detection of aquatic habitats in Italian volcanic lakes using historical data	Plant Biosystems	ecological	regional	IT	positive
434	10.1002/aqc.743	V. Della Bella, M. Bazzanti and F. Chiarotti	2005	Macroinvertebrate diversity and conservation status of Mediterranean ponds in Italy: water permanence and mesohabitat influence	Aquatic Conservation-Marine and Freshwater Ecosystems	ecological	regional	IT	no opinion
435	WOS:000284202800006	C. Meireles, R. Neiva, I. Passos, C. Vila-Vicosa, R. Paiva-Ferreira and C. Pinto-Gomes	2009	The management and preservation of communitarian interest habitats in the Natural Park of Serra da Estrela (Portugal)	Acta Botanica Gallica	ecological	regional	PT	no opinion
436	10.1016/j.jnc.2008.12.005	T. A. Rowell	2009	Management planning guidance for protected sites in the UK; a comparison of formats and definitions in nine guides	Journal for Nature Conservation	social and policies	national	UK	negative
437	10.1007/s00267-010-9606-z	E. I. F. Torbidoni	2011	Managing for Recreational Experience Opportunities: The Case of Hikers in Protected Areas in Catalonia, Spain	Environmental Management	social and policies	regional	ES	no opinion
438	10.1093/jel/eqq013	A. Trouwborst	2010	Managing the Carnivore Comeback: International and EU Species Protection Law and the Return of Lynx, Wolf and Bear to Western Europe	Journal of Environmental Law	social and policies	European	EU15	negative
439	10.1007/s10661-011-1995-9	V. Tomaselli, P. Tenerelli and S. Sciandrello	2012	Mapping and quantifying habitat fragmentation in small coastal areas: a case study of three protected wetlands in Apulia (Italy)	Environmental Monitoring and Assessment	ecological	regional	IT	no opinion
440	10.1016/j.marpol.2008.12.007	S. A. Pedersen, H. O. Fock and A. F. Sell	2009	Mapping fisheries in the German exclusive economic zone with special reference to offshore Natura 2000 sites	Marine Policy	ecological	multinational	DE, NL, SE, UK, BE, PL, LV	negative
441	10.1002/aqc.1144	P. D. Hunter, D. J. Gilvear, A. N. Tyler, N. J. Willby and A. Kelly	2010	Mapping macrophytic vegetation in shallow lakes using the Compact Airborne Spectrographic Imager (CASI)	Aquatic Conservation-Marine and Freshwater Ecosystems	ecological	regional	UK	no opinion
442	10.1016/j.ecoinf.2007.04.003	C. Sanchez-Hernandez, D. S. Boyd and G. M. Foody	2007	Mapping specific habitats from remotely sensed imagery: Support vector machine and support vector data description based classification of coastal saltmarsh habitats	Ecological Informatics	ecological	regional	UK	no opinion
443	10.1016/s0308-597x(98)00056-6	P. J. S. Jones	1999	Marine nature reserves in Britain: past lessons, current status and future issues	Marine Policy	social and policies	national	UK	negative
444	10.1016/j.biocon.2003.10.006	M. B. Araujo	2004	Matching species with reserves - uncertainties from using data at different resolutions	Biological Conservation	ecological	national	PT	no opinion
445	10.1016/j.ecolind.2012.10.019	D. L. Diaz-Gomez, A. G. Toxopeus, T. A. Groen, A. R. Munoz, A. K. Skidmore and R. Real	2013	Measuring the Insecurity Index of species in networks of protected areas using species distribution modeling and fuzzy logic: The case of raptors in Andalusia	Ecological Indicators	ecological	regional	ES	mixed
446	10.1016/j.jenvman.2012.06.005	Z. Sarvasova, J. Salka and Z. Dobsinska	2013	Mechanism of cross-sectoral coordination between nature protection and forestry in the Natura 2000 formulation process in Slovakia	Journal of Environmental Management	social and policies	national	SK	negative
447	10.1127/0340-269x/2011/0041-0501	E. Farris, G. Fenu and G. Baccheta	2012	Mediterranean Taxus baccata woodlands in Sardinia: a characterization of the EU priority habitat 9580	Phytocoenologia	ecological	regional	IT	positive
448	10.1080/12538078.2013.773461	P. Ernandes and S. Marchiori	2013	Mediterranean temporary ponds in Puglia (South Italy): a "joyau floristique" to protect	Acta Botanica Gallica	ecological	regional	IT	no opinion
449	10.1007/s10531-010-9933-7	I. Zacharias and M. Zamparas	2010	Mediterranean temporary ponds. A disappearing ecosystem	Biodiversity and Conservation	ecological	European	EU27	negative
450	WOS:000302825000060	A. Gil, H. Calado, L. T. Costa, J. Bentz, C. Fonseca, A. Lobo, M. Vergilio and J. Benedicto	2011	A Methodological Proposal for the Development of Natura 2000 Sites Management Plans	Journal of Coastal Research	social and policies	regional	PT	no opinion
451	10.1016/j.biocon.2010.04.033	A. Kuczynska and E. Moorkens	2010	Micro-hydrological and micro-meteorological controls on survival and population growth of the whorl snail Vertigo geyeri Lindholm, 1925 in groundwater fed wetlands	Biological Conservation	ecological	regional	IE	positive
452	10.1080/19443994.2012.714862	B. Arconada, P. Delgado and A. Garcia	2013	Minimizing environmental risks on constructing marine pipelines: Aguilas desalination plant	Desalination and Water Treatment	ecological	regional	ES	no opinion
453	10.1111/cobi.12154	E. L. Stone, G. Jones and S. Harris	2013	Mitigating the Effect of Development on Bats in England with Derogation Licensing	Conservation Biology	ecological	national	UK	negative
454	10.1016/j.biocon.2007.08.013	M. Drechsler, F. Watzold, K. Johst, H. Bergmann and J. Settele	2007	A model-based approach for designing cost-effective compensation payments for conservation of endangered species in real landscapes	Biological Conservation	ecological	regional	DE	no opinion
455	10.1016/j.jnc.2012.10.003	L. Bosso, H. Rebelo, A. P. Garonna and D. Russo	2013	Modelling geographic distribution and detecting conservation gaps in Italy for the threatened beetle Rosalia alpina	Journal for Nature Conservation	ecological	multinational	IT, FR, CH, AT, SI	negative
456	10.1016/j.biocon.2007.02.025	J. Buse, B. Schroder and T. Assmann	2007	Modelling habitat and spatial distribution of an endangered longhorn beetle - A case study for saproxylic insect conservation	Biological Conservation	ecological	regional	DE	no opinion
457	10.1016/j.ecolmodel.2013.01.008	M. Zohmann, J. Pennerstorfer and U. Nopp-Mayr	2013	Modelling habitat suitability for alpine rock ptarmigan (Lagopus muta helvetica) combining object-based classification of IKONOS imagery and Habitat Suitability Index modelling	Ecological Modelling	ecological	regional	AT	no opinion
458	10.1016/j.biocon.2010.12.028	C. A. Sullivan, D. Bourke, M. S. Skeffington, J. A. Finn, S. Green, S. Kelly and M. J. Gormally	2011	Modelling semi-natural habitat area on lowland farms in western Ireland	Biological Conservation	ecological	regional	IE	negative
459	10.1007/s10661-009-0849-1	I. Meliadis, P. Platis, A. Ainalis and M. Meliadis	2010	Monitoring and analysis of natural vegetation in a Special Protected Area of Mountain Antichasia-Meteora, central Greece	Environmental Monitoring and Assessment	ecological	regional	GR	no opinion
460	WOS:000292625600007	A. Campanaro, I. Toni, S. Hardersen and D. A. Grasso	2011	Monitoring of Lucanus cervus by means of Remains of Predation (Coleoptera: Lucanidae)	Entomologia Generalis	ecological	regional	IT	negative
462	10.1002/aqc.923	J. R. A. Butler, S. J. Middlemas, S. A. McKelvey, I. McMyn, B. Leyshon, I. Walker, P. M. Thompson, I. L. Boyd, C. Duck, J. D. Armstrong, I. M. Graham and J. M. Baxter	2008	The Moray Firth Seal Management Plan: an adaptive framework for balancing the conservation of seals, salmon, fisheries and wildlife tourism in the UK	Aquatic Conservation-Marine and Freshwater Ecosystems	social and policies	regional	UK	positive
463	10.1016/j.landusepol.2006.04.001	C. Zoppi	2007	A multicriteria-contingent valuation analysis concerning a coastal area of Sardinia, Italy	Land Use Policy	social and policies	regional	IT	no opinion
464	10.1016/j.jnc.2006.09.001	S. Normand, J. C. Svenning and F. Skov	2007	National and European perspectives on climate change sensitivity of the habitats directive characteristic plant species	Journal for Nature Conservation	ecological	European	EUGeo	positive
465	10.1007/s10531-008-9432-2	T. Kull, M. Sammul, K. Kull, K. Lanno, K. Tali, B. Gruber, D. Schmeller and K. Henle	2008	Necessity and reality of monitoring threatened European vascular plants	Biodiversity and Conservation	ecological	European	EU27	positive
466	10.5253/078.098.0314	M. Platteeuw, R. P. B. Foppen and M. R. van Eerden	2010	The need for future wetland bird studies: scales of habitat use as input for ecological restoration and spatial water management	Ardea	ecological	national	NL	negative
468	10.1016/j.landurbplan.2007.03.005	S. Saura and L. Pascual-Hortal	2007	A new habitat availability index to integrate connectivity in landscape conservation planning: Comparison with existing indices and application to a case study	Landscape and Urban Planning	social and policies	regional	ES	negative
469	10.1080/11263504.2011.642417	G. Bacchetta, E. Farris and C. Pontecorvo	2012	A new method to set conservation priorities in biodiversity hotspots	Plant Biosystems	ecological	regional	IT	negative
470	10.1007/s10531-012-0343-x	M. Denoel	2012	Newt decline in Western Europe: highlights from relative distribution changes within guilds	Biodiversity and Conservation	ecological	multinational	BE, DE, LU, CH, NL	negative
471	10.1111/conl.12030	D. Maes, S. Collins, M. L. Munguira, M. Sasic, J. Settele, C. van Swaay, R. Verovnik, M. Warren, M. Wiemers and I. Wynhoff	2013	Not the Right Time to Amend the Annexes of the European Habitats Directive	Conservation Letters	social and policies	European	EU27	positive
472	10.1016/j.eiar.2009.02.001	A. Jiricka and U. Probstl	2009	One common way - The strategic and methodological influence on environmental planning across Europe	Environmental Impact Assessment Review	social and policies	multinational	AT, FR, IT, DE	mixed
473	10.1016/j.ecolmodel.2009.01.012	G. Parolo, A. Ferrarini and G. Rossi	2009	Optimization of tourism impacts within protected areas by means of genetic algorithms	Ecological Modelling	ecological	regional	IT	no opinion
474	10.1023/a:1015364020043	T. Ranius	2002	Osmoderma eremita as an indicator of species richness of beetles in tree hollows	Biodiversity and Conservation	ecological	regional	SE	positive
475	10.1111/j.1752-4598.2012.00218.x	S. Berces and Z. Elek	2013	Overlapping generations can balance the fluctuations in the activity patterns of an endangered ground beetle species: long-term monitoring of Carabus hungaricus in Hungary	Insect Conservation and Diversity	ecological	regional	HU	positive
476	10.1111/j.1523-1739.2008.01127.x	A. Vellak, E. L. Tuvi, U. Reier, R. Kalamees, E. Roosaluste, M. Zobel and M. Partel	2009	Past and Present Effectiveness of Protected Areas for Conservation of Naturally and Anthropogenically Rare Plant Species	Conservation Biology	ecological	national	EE	positive
477	10.1111/1365-2745.12050	J. Nascimbene, R. Benesperi, G. Brunialti, I. Catalano, M. D. Vedove, M. Grillo, D. Isocrono, E. Matteucci, G. Potenza, D. Puntillo, M. Puntillo, S. Ravera, G. Rizzi and P. Giordani	2013	Patterns and drivers of beta-diversity and similarity of Lobaria pulmonaria communities in Italian forests	Journal of Ecology	ecological	national	IT	positive
478	10.1016/j.crvi.2010.06.006	S. Bagella, M. C. Caria and V. Zuccarello	2010	Patterns of emblematic habitat types in Mediterranean temporary wetlands	Comptes Rendus Biologies	ecological	regional	IT	no opinion
479	10.1080/11263504.2013.788571	S. Ribeiro, M. Ladero and M. D. Espirito-Santo	2013	Patterns of floristic composition of Mediterranean meadows and mesophytic grasslands in eastern Continental Portugal	Plant Biosystems	ecological	regional	PT	no opinion
480	10.1016/j.biocon.2003.09.004	S. F. Jackson, M. Kershaw and K. J. Gaston	2004	The performance of procedures for selecting conservation areas: waterbirds in the UK	Biological Conservation	ecological	national	UK	mixed
481	10.3354/meps10241	D. S. Green and T. P. Crowe	2013	Physical and biological effects of introduced oysters on biodiversity in an intertidal boulder field	Marine Ecology Progress Series	ecological	regional	IE	no opinion
482	WOS:000298268100013	C. Brullo, P. Minissale, S. Sciandrello and G. Spampinato	2011	Phytogeographic survey on the endemic vascular flora of the Hyblaean territory (SE Sicily, Italy)	Acta Botanica Gallica	ecological	regional	IT	no opinion
483	WOS:000172203700004	J. Rodriguez-Oubina, J. Izco and P. Ramil	2001	Phytosociological characterization of Sphagnum pylaesii Brid. communities in Northwest Spain	Acta Botanica Gallica	ecological	regional	ES	negative
484	10.1080/11263504.2012.717547	S. Assini, G. P. Mondino, P. Varese, M. Barcella and F. Bracco	2013	A phytosociological survey of the Corynephorus canescens (L.) Beauv. communities of Italy	Plant Biosystems	ecological	regional	IT	no opinion
485	10.1016/j.jnc.2009.04.006	P. Ganatsas and G. Thanasis	2010	Pinus halepensis invasion in Pinus pinea habitat in Strofylia forest (Site of NATURA 2000 network), southern Greece	Journal for Nature Conservation	ecological	regional	GR	positive
486	10.1007/s10750-009-9885-7	C. Pinto-Cruz, J. A. Molina, M. Barbour, V. Silva and M. D. Espirito-Santo	2009	Plant communities as a tool in temporary ponds conservation in SW Portugal	Hydrobiologia	ecological	regional	PT	negative
487	WOS:000296401700009	D. Zahariev	2011	PLANTS WITH PROTECTION STATUTE, ENDEMITES AND RELICTS OF PRESLAVSKA MOUNTAIN PROTECTED AREA	Comptes Rendus De L Academie Bulgare Des Sciences	ecological	regional	BG	no opinion
488	10.1080/09640568.2012.758627	K. Arts, A. Fischer and R. van der Wal	2014	Political decision making, governance shifts and Scottish animal reintroductions: are democratic principles at stake?	Journal of Environmental Planning and Management	social and policies	regional	UK	negative
489	10.1016/j.actao.2008.08.002	T. Hartel, S. Nemes, D. Cogalniceanu, K. Ollerer, C. I. Moga, D. Lesbarreres and L. Demeter	2009	Pond and landscape determinants of Rana dalmatina population sizes in a Romanian rural landscape	Acta Oecologica-International Journal of Ecology	ecological	regional	RO	positive
491	10.1016/j.ecss.2011.08.021	A. Franco, P. Franzoi, S. Malavasi, M. Zucchetta and P. Torricelli	2012	Population and habitat status of two endemic sand gobies in lagoon marshes - Implications for conservation	Estuarine Coastal and Shelf Science	ecological	regional	IT	no opinion
492	10.1007/s10841-007-9096-3	A. Matern, C. Drees, H. Meyer and T. Assmann	2008	Population ecology of the rare carabid beetle Carabus variolosus (Coleoptera : Carabidae) in North-west Germany	Journal of Insect Conservation	ecological	regional	DE	mixed
493	10.1111/acv.12022	N. Reid, S. K. Dingerkus, R. E. Stone, S. Pietravalle, R. Kelly, J. Buckley, T. J. C. Beebee, F. Marnell and J. W. Wilkinson	2013	Population enumeration and assessing conservation status in a widespread amphibian: a case study of Rana temporaria in Ireland	Animal Conservation	ecological	national	IE	negative
494	WOS:000291577700001	K. Poirazidis, S. Schindler, E. Kakalis, C. Ruiz, D. E. Bakaloudis, C. Scandolara, C. Eastham, H. Hristov and G. Catsadorakis	2011	POPULATION ESTIMATES FOR THE DIVERSE RAPTOR ASSEMBLAGE OF DADIA NATIONAL PARK, GREECE	Ardeola	ecological	regional	GR	positive
495	10.1016/j.flora.2005.11.001	D. Roder and K. Kiehl	2006	Population structure and population dynamic of Pulsatilla patens (L.) Mill. in relation to vegetation characteristics	Flora	ecological	regional	DE	mixed
496	10.1016/j.marpol.2011.01.020	M. Lonergan	2011	Potential biological removal and other currently used management rules for marine mammal populations: A comparison	Marine Policy	ecological	European	EU27	negative
497	10.1016/j.biocon.2004.08.005	R. M. Chefaoui, J. Hortal and J. M. Lobo	2005	Potential distribution modelling, niche characterization and conservation status assessment using GIS tools: a case study of Iberian Copris species	Biological Conservation	ecological	national	ES	negative
498	10.1016/j.biocon.2008.04.008	M. R. Trivedi, M. D. Morecroft, P. M. Berry and T. P. Dawson	2008	Potential effects of climate change on plant communities in three montane nature reserves in Scotland, UK	Biological Conservation	ecological	regional	UK	no opinion
499	10.1007/s10531-010-9865-2	D. Rodder and U. Schulte	2010	Potential loss of genetic variability despite well established network of reserves: the case of the Iberian endemic lizard Lacerta schreiberi	Biodiversity and Conservation	ecological	multinational	ES, PT	negative
500	10.1016/j.ecolind.2013.10.010	H. Culmsee, M. Schmidt, I. Schmiedel, A. Schacherer, P. Meyer and C. Leuschner	2014	Predicting the distribution of forest habitat types using indicator species to facilitate systematic conservation planning	Ecological Indicators	ecological	regional	DE	negative
501	10.1016/j.foreco.2008.09.023	J. Muller, J. Pollath, R. Moshammer and B. Schroder	2009	Predicting the occurrence of Middle Spotted Woodpecker Dendrocopos medius on a regional scale, using forest inventory data	Forest Ecology and Management	ecological	regional	DE	positive
502	10.1016/j.foreco.2011.02.023	R. A. Diaz-Varela, P. Alvarez-Alvarez, E. Diaz-Varela and S. Calvo-Iglesias	2011	Prediction of stand quality characteristics in sweet chestnut forests in NW Spain by combining terrain attributes, spectral textural features and landscape metrics	Forest Ecology and Management	ecological	regional	ES	negative
503	10.1016/j.ecolind.2011.11.012	A. Baattrup-Pedersen, H. E. Andersen, S. E. Larsen, B. Nygaard and R. Ejrnaes	2012	Predictive modelling of protected habitats in riparian areas from catchment characteristics	Ecological Indicators	ecological	national	DK	no opinion
504	10.1111/acv.12013	A. Rainho and J. M. Palmeirim	2013	Prioritizing conservation areas around multispecies bat colonies using spatial modeling	Animal Conservation	ecological	regional	PT	negative
505	10.1002/aqc.568	J. Grall and J. M. Hall-Spencer	2003	Problems facing maerl conservation in Brittany	Aquatic Conservation-Marine and Freshwater Ecosystems	ecological	regional	FR	positive
506	10.1023/a:1020095220957	S. Back, J. Ekebom and P. Kangas	2002	A proposal for a long-term baseline phytobenthos monitoring programme for the Finnish Baltic coastal waters: Monitoring submerged rocky shore vegetation	Environmental Monitoring and Assessment	ecological	national	FI	no opinion
507	10.1016/j.biocon.2011.12.002	S. Garthe, N. Markones, B. Mendel, N. Sonntag and J. C. Krause	2012	Protected areas for seabirds in German offshore waters: Designation, retrospective consideration and current perspectives	Biological Conservation	ecological	regional	DE	mixed
509	10.1007/s10464-010-9391-0	P. Castro and C. Mouro	2011	Psycho-Social Processes in Dealing with Legal Innovation in the Community: Insights from Biodiversity Conservation	American Journal of Community Psychology	social and policies	European	EU27	mixed
510	10.1016/j.biocon.2012.08.012	P. Gauthier, Y. Foulon, O. Jupille and J. D. Thompson	2013	Quantifying habitat vulnerability to assess species priorities for conservation management	Biological Conservation	ecological	regional	FR	no opinion
512	10.1556/ComEc.9.2008.2.7	A. Chiarucci, G. Bacaro, A. Vannini and D. Rocchini	2008	Quantifying species richness at multiple spatial scales in a Natura 2000 network	Community Ecology	ecological	regional	IT	negative
513	10.1016/j.ecolind.2012.09.013	C. A. Mucher, L. Kooistra, M. Vermeulen, J. Vanden Borre, B. Haest and R. Haveman	2013	Quantifying structure of Natura 2000 heathland habitats using spectral mixture analysis and segmentation techniques on hyperspectral imagery	Ecological Indicators	ecological	regional	NL	no opinion
514	10.1016/j.biocon.2009.03.019	L. J. Wilson, C. A. McSorley, C. M. Gray, B. J. Dean, T. E. Dunn, A. Webb and J. B. Reid	2009	Radio-telemetry as a tool to define protected areas for seabirds in the marine environment	Biological Conservation	ecological	regional	UK	no opinion
515	10.1007/s10531-004-4283-y	P. A. V. Borges, C. Aguiar, J. Amaral, I. R. Amorim, G. Andre, A. Arraiol, A. Baz, F. Dinis, H. Enghoff, C. Gaspar, F. Ilharco, V. Mahnert, C. Melo, F. Pereira, J. A. Quartau, S. P. Ribeiro, J. Ribes, A. R. M. Serrano, A. B. Sousa, R. Z. Strassen, L. Vieira, V. Vieira, A. Vitorino and J. Wunderlich	2005	Ranking protected areas in the Azores using standardised sampling of soil epigean arthropods	Biodiversity and Conservation	ecological	regional	PT	positive
516	10.1016/s0006-3207(03)00128-9	J. C. M. Saiz, F. D. Lozano and H. S. Ollero	2003	Recent progress in conservation of threatened Spanish vascular flora: a critical review	Biological Conservation	ecological	national	ES	no opinion
517	10.1080/11250003.2010.485210	A. Mazzei, T. Bonacci, E. Contarini, T. Zetto and P. Brandmayr	2011	Rediscovering the 'umbrella species' candidate Cucujus cinnaberinus (Scopoli, 1763) in Southern Italy (Coleoptera Cucujidae), and notes on bionomy	Italian Journal of Zoology	ecological	regional	IT	mixed
518	10.3354/meps10260	L. Mikkelsen, K. N. Mouritsen, K. Dahl, J. Teilmann and J. Tougaard	2013	Re-established stony reef attracts harbour porpoises Phocoena phocoena	Marine Ecology Progress Series	ecological	regional	DK	no opinion
519	10.1007/s10021-007-9020-4	J. D. A. Millington, G. L. W. Perry and R. Romero-Calcerrada	2007	Regression techniques for examining land use/cover change: A case study of a mediterranean landscape	Ecosystems	ecological	regional	ES	no opinion
520	10.1016/j.ecoleng.2013.04.028	D. Kopec, D. Michalska-Hejduk and E. Krogulec	2013	The relationship between vegetation and groundwater levels as an indicator of spontaneous wetland restoration	Ecological Engineering	ecological	regional	PL	no opinion
522	10.1007/s10530-012-0360-4	L. Cano, J. A. Campos, D. Garcia-Magro and M. Herrera	2013	Replacement of estuarine communities by an exotic shrub: distribution and invasion history of Baccharis halimifolia in Europe	Biological Invasions	ecological	multinational	UK, BE, NL, FR, ES, IT	no opinion
523	10.1111/j.1654-109X.2011.01123.x	A. M. Laine, M. Leppala, O. Tarvainen, M. L. Paatalo, R. Seppanen and A. Tolvanen	2011	Restoration of managed pine fens: effect on hydrology and vegetation	Applied Vegetation Science	ecological	regional	FI	no opinion
524	10.1111/j.1654-1103.2011.01337.x	J. C. Gegout and C. Coudun	2012	The right releve in the right vegetation unit: a new typicality index to reproduce expert judgement with an automatic classification programme	Journal of Vegetation Science	ecological	national	FR	no opinion
525	10.4404/hystrix-23.2-4779	B. Milchev and V. Georgiev	2012	Roach's mouse-tailed dormouse Myomimus roachi distribution and conservation in Bulgaria	Hystrix-Italian Journal of Mammalogy	ecological	regional	BG	mixed
527	10.1016/j.envsci.2010.09.010	S. Hallsworth, A. J. Dore, W. I. Bealey, U. Dragosits, M. Vieno, S. Hellsten, Y. S. Tang and M. A. Sutton	2010	The role of indicator choice in quantifying the threat of atmospheric ammonia to the 'Natura 2000' network	Environmental Science & Policy	ecological	national	UK	positive
528	10.1080/09640568.2012.724014	V. Vikolainen, H. Bressers and K. Lulofs	2013	The role of Natura 2000 and project design in implementing flood defence projects in the Scheldt estuary	Journal of Environmental Planning and Management	ecological	regional	BE	negative
529	10.1016/j.foreco.2007.12.019	J. A. Ramirez and M. Diaz	2008	The role of temporal shrub encroachment for the maintenance of Spanish holm oak Quercus ilex dehesas	Forest Ecology and Management	ecological	regional	ES	no opinion
530	10.1016/s0006-3207(99)00160-3	B. Wood	2000	Room for nature? Conservation management of the Isle of Rum, UK and prospects for large protected areas in Europe	Biological Conservation	ecological	regional	UK	no opinion
531	WOS:000179937900008	E. G. Luque and F. G. Mercado	2002	Rupicolous communities of the southeast of the Iberian Peninsula	Acta Botanica Gallica	ecological	regional	ES	positive
532	10.1016/j.ecolind.2012.04.013	T. Lachat, B. Wermelinger, M. M. Gossner, H. Bussler, G. Isacsson and J. Muller	2012	Saproxylic beetles as indicator species for dead-wood amount and temperature in European beech forests	Ecological Indicators	ecological	multinational	BE, DE, LU, SE, CH, SK, UA	positive
533	WOS:000260115400010	J. J. Ducasse and H. Brustel	2008	SAPROXYLIC BEETLES IN THE GRESIGNE FOREST MANAGEMENT	Revue D Ecologie-La Terre Et La Vie	ecological	regional	FR	positive
534	10.1111/j.1472-4642.2011.00855.x	A. Moran-Ordonez, S. Suarez-Seoane, J. Elith, L. Calvo and E. de Luis	2012	Satellite surface reflectance improves habitat distribution mapping: a case study on heath and shrub formations in the Cantabrian Mountains (NW Spain)	Diversity and Distributions	ecological	regional	ES	no opinion
535	10.1007/s10531-011-0196-8	A. Chiarucci, G. Bacaro, G. Filibeck, S. Landi, S. Maccherini and A. Scoppola	2012	Scale dependence of plant species richness in a network of protected areas	Biodiversity and Conservation	ecological	regional	IT	no opinion
537	WOS:000311829900004	M. Welch-Devine	2012	Searching for Success: Defining Success in Co-Management	Human Organization	social and policies	regional	FR	negative
538	10.1017/s0025315412001397	P. Anderwald, M. D. Haberlin, M. Coleman, O. O. Cadhla, A. Englund, F. Visser and M. Cronin	2012	Seasonal trends and spatial differences in marine mammal occurrence in Broadhaven Bay, north-west Ireland	Journal of the Marine Biological Association of the United Kingdom	ecological	regional	IE	no opinion
539	10.1007/s10531-008-9390-8	P. Ganatsas, M. Tsakaldimi and C. Thanos	2008	Seed and cone diversity and seed germination of Pinus pinea in Strofylia Site of the Natura 2000 Network	Biodiversity and Conservation	ecological	regional	GR	positive
541	10.1007/s10531-008-9476-3	F. V. Eppink and F. Watzold	2009	Shedding light on the hidden costs of the Habitats Directive: the case of hamster conservation in Germany	Biodiversity and Conservation	ecological	regional	DE	positive
542	10.1016/j.jnc.2009.11.003	E. Farris, R. Filigheddu, P. Deiana, G. A. Farris and G. Garau	2010	Short-term effects on sheep pastureland due to grazing abandonment in a Western Mediterranean island ecosystem: A multidisciplinary approach	Journal for Nature Conservation	ecological	regional	IT	positive
543	10.1016/j.flora.2013.04.003	B. Krause and H. Culmsee	2013	The significance of habitat continuity and current management on the compositional and functional diversity of grasslands in the uplands of Lower Saxony, Germany	Flora	ecological	regional	DE	no opinion
544	10.1016/j.jnc.2013.03.004	G. F. Horvath and R. Herczeg	2013	Site occupancy response to natural and anthropogenic disturbances of root vole: Conservation problem of a vulnerable relict subspecies	Journal for Nature Conservation	ecological	regional	HU	positive
545	10.3986/ags53106	N. Marot, S. Kolaric and M. Golobic	2013	Slovenia as the natural park of Europe? A territorial impact assessment in the case of Natura 2000	Acta Geographica Slovenica-Geografski Zbornik	social and policies	national	SI	mixed
546	WOS:000302825000188	A. Cruz, J. Benedicto and A. Gil	2011	Socio-economic Benefits of Natura 2000 in Azores Islands - a Case Study approach on ecosystem services provided by a Special Protected Area	Journal of Coastal Research	ecological	regional	PT	no opinion
548	10.1016/j.seares.2011.09.006	X. Guinda, J. A. Juanes, A. Puente and B. Echavarri-Erasun	2012	Spatial distribution pattern analysis of subtidal macroalgae assemblages by a non-destructive rapid assessment method	Journal of Sea Research	ecological	regional	ES	no opinion
549	10.5586/asbp.2013.003	T. H. Szymura and M. Szymura	2013	Spatial variability more influential than soil pH and land relief on thermophilous vegetation in overgrown coppice oak forests	Acta Societatis Botanicorum Poloniae	ecological	regional	PL	no opinion
550	10.1080/11263500903187068	S. Bagella, M. C. Caria, E. Farris and R. Filigheddu	2009	Spatial-time variability and conservation relevance of plant communities in Mediterranean temporary wet habitats: A case study in Sardinia (Italy)	Plant Biosystems	ecological	regional	IT	no opinion
551	WOS:000314137200005	A. D. Sandor and C. Domsa	2012	Special Protected Areas for Conservation of Romania' Forest Birds: Status Assessment and Possible Expansion using Predictive Tools	Acta Zoologica Bulgarica	ecological	national	RO	negative
552	10.1556/ComEc.10.2009.2.4	T. Hartel, C. I. Moga, A. David and I. Coroiu	2009	Species richness - pond area relationships of amphibians and birds in two Natura 2000 protected areas of Romania	Community Ecology	ecological	regional	RO	no opinion
553	10.1007/s10342-012-0660-3	M. Venturas, S. G. Alvarez, M. F. Alcantara, C. Collada and L. Gil	2013	Species selection for reforestations: what happens with historic local extinctions and habitat protection zones? A case study in the Cantabrian Range	European Journal of Forest Research	ecological	regional	ES	negative
554	10.1007/s10841-013-9561-0	G. Caci, A. B. Biscaccianti, L. Cistrone, L. Bosso, A. P. Garonna and D. Russo	2013	Spotting the right spot: computer-aided individual identification of the threatened cerambycid beetle Rosalia alpina	Journal of Insect Conservation	ecological	national	IT	no opinion
555	10.1016/j.landusepol.2012.08.011	G. Kindermann and M. J. Gormally	2013	Stakeholder perceptions of recreational and management impacts on protected coastal dune systems: A comparison of three European countries	Land Use Policy	social and policies	multinational	UK, IE, DE	negative
556	10.1016/j.biocon.2004.05.005	S. Durell, S. McGrorty, A. D. West, R. T. Clarke, J. D. Goss-Custard and R. A. Stillman	2005	A strategy for baseline monitoring of estuary Special Protection Areas	Biological Conservation	ecological	regional	UK	no opinion
557	10.1111/j.1365-2427.2011.02606.x	A. Baattrup-Pedersen, S. E. Larsen, P. Mejlhede, J. Audet, C. C. Hoffman, H. E. Andersen, C. Kjaergaard and B. Kronvang	2011	Stream characteristics and their implications for the protection of riparian fens and meadows	Freshwater Biology	ecological	national	DK	no opinion
558	10.1007/s11258-012-0146-x	L. C. J. Lacambra, L. F. de Una, M. M. Santos, F. B. L. de Lerma and V. E. San Emeterio	2013	Structural characterization and analysis of the regeneration of woodlands dominated by Juniperus oxycedrus L. in west-central Spain	Plant Ecology	ecological	regional	ES	positive
559	10.1080/17550874.2012.740509	M. L. Carranza, L. Frate and B. Paura	2012	Structure, ecology and plant richness patterns in fragmented beech forests	Plant Ecology & Diversity	ecological	regional	IT	no opinion
560	WOS:000329549800005	S. Feys, R. Guelinckx, F. Verdonckt and G. Louette	2013	Successful reproduction of Hen Harrier Circus cyaneus in intensive arable farmland (central-east Belgium)	Belgian Journal of Zoology	ecological	regional	BE	no opinion
561	WOS:000321597300016	H. Walentowski, E. D. Schulze, M. Teodosiu, O. Bouriaud, A. von Hessberg, H. Bussler, L. Baldauf, I. Schulze, J. Waldchen, R. Bocker, S. Herzog and W. Schulze	2013	Sustainable forest management of Natura 2000 sites: a case study from a private forest in the Romanian Southern Carpathians	Annals of Forest Research	ecological	regional	RO	negative
562	10.1016/j.biocon.2012.06.016	J. Maes, M. L. Paracchini, G. Zulian, M. B. Dunbar and R. Alkemade	2012	Synergies and trade-offs between ecosystem service supply, biodiversity, and habitat conservation status in Europe	Biological Conservation	social and policies	European	EU27	mixed
563	10.1007/s10980-008-9274-z	C. J. Grashof-Bokdam, J. P. Chardon, C. C. Vos, R. P. B. Foppen, M. WallisDeVries, M. van der Veen and H. A. M. Meeuwsen	2009	The synergistic effect of combining woodlands and green veining for biodiversity	Landscape Ecology	ecological	regional	NL	mixed
564	10.1016/j.apsoil.2013.08.012	S. N. Vink, R. Neilson, D. Robinson and T. J. Daniell	2014	Temporal and land use effects on soil bacterial community structure of the machair, an EU Habitats Directive Annex I low-input agricultural system	Applied Soil Ecology	ecological	regional	UK	no opinion
565	10.3897/zookeys.174.2474	K. Vardinoyannis, S. Demetropoulos, M. Mylonas, K. A. Triantis, C. Makris, G. Georgiou, A. Wiktor and A. Demetropoulos	2012	Terrestrial slugs (Gastropoda, Pulmonata) in the NATURA 2000 areas of Cyprus island	Zookeys	ecological	national	CY	positive
566	10.1016/j.ecss.2007.12.006	A. Puente and J. A. Juanes	2008	Testing taxonomic resolution, data transformation and selection of species for monitoring macroalgae communities	Estuarine Coastal and Shelf Science	ecological	regional	ES	no opinion
567	10.1016/j.ecolind.2009.06.006	D. Edwards, F. S. Jensen, M. Marzano, B. Mason, S. Pizzirani and M. J. Schelhaas	2011	A theoretical framework to assess the impacts of forest management on the recreational value of European forests	Ecological Indicators	social and policies	European	EU27	no opinion
568	10.1016/j.biocon.2009.11.027	J. Muller and M. M. Gossner	2010	Three-dimensional partitioning of diversity informs state-wide strategies for the conservation of saproxylic beetles	Biological Conservation	ecological	regional	DE	no opinion
570	10.1002/ece3.585	T. B. Stringell, R. N. Bamber, M. Burton, C. Lindenbaum, L. R. Skates and W. G. Sanderson	2013	A tool for protected area management: multivariate control charts "cope' with rare variable communities	Ecology and Evolution	ecological	regional	UK	no opinion
571	10.1007/s10531-013-0442-3	J. E. Moeslund, L. Arge, P. K. Bocher, T. Dalgaard, R. Ejrnaes, M. V. Odgaard and J. C. Svenning	2013	Topographically controlled soil moisture drives plant diversity patterns within grasslands	Biodiversity and Conservation	ecological	regional	DK	no opinion
573	10.1017/s0025315409003105	E. Cacabelos, M. Dominguez and J. S. Troncoso	2009	Trophic structure of soft-bottom macrobenthos in an inlet in north-western Spain	Journal of the Marine Biological Association of the United Kingdom	ecological	regional	ES	no opinion
574	10.1016/j.biocon.2006.06.019	M. S. Skeffington, J. Moran, A. O Connor, E. Regan, C. E. Coxon, N. E. Scott and M. Gormally	2006	Ttirloughs - Ireland's unique wetland habitat	Biological Conservation	ecological	national	IE	no opinion
575	WOS:000253068600005	M. S. Skeffington and M. Gormally	2007	Turloughs: A mosaic of biodiversity and management systems unique to Ireland	Acta Carsologica	ecological	national	IE	no opinion
576	10.1007/s10980-006-6587-7	G. E. M. Van der Lee, D. T. Van der Molen, H. F. P. Van den Boogaard and H. Van der Klis	2006	Uncertainty analysis of a spatial habitat suitability model and implications for ecological management of water bodies	Landscape Ecology	ecological	regional	NL	no opinion
577	10.1016/j.jenvman.2010.11.032	C. Perez-Hugalde, R. Romero-Calcerrada, P. Delgado-Perez and C. J. Novillo	2011	Understanding land cover change in a Special Protection Area in Central Spain through the enhanced land cover transition matrix and a related new approach	Journal of Environmental Management	ecological	regional	ES	negative
578	10.1111/j.1523-1739.2012.01869.x	W. D. Simonson, H. D. Allen and D. A. Coomes	2012	Use of an Airborne Lidar System to Model Plant Species Composition and Diversity of Mediterranean Oak Forests	Conservation Biology	ecological	regional	PT	no opinion
579	10.1007/s10531-010-9947-1	S. Mobaied, B. Riera, A. Lalanne, M. Baguette and N. Machon	2011	The use of diachronic spatial approaches and predictive modelling to study the vegetation dynamics of a managed heathland	Biodiversity and Conservation	ecological	regional	FR	no opinion
580	10.1016/j.biocon.2011.12.033	S. H. O'Brien, A. Webb, M. J. Brewer and J. B. Reid	2012	Use of kernel density estimation and maximum curvature to set Marine Protected Area boundaries: Identifying a Special Protection Area for wintering red-throated divers in the UK	Biological Conservation	ecological	national	UK	negative
581	10.1002/aqc.553	J. Ekebom and A. Erkkila	2003	Using aerial photography for identification of marine and coastal habitats under the EU's Habitats Directive	Aquatic Conservation-Marine and Freshwater Ecosystems	ecological	regional	FI	no opinion
582	10.1016/j.jenvman.2007.06.024	T. K. Alexandridis, E. Lazaridou, A. Tsirika and G. C. Zalidis	2009	Using Earth Observation to update a Natura 2000 habitat map for a wetland in Greece	Journal of Environmental Management	ecological	regional	GR	no opinion
584	10.1016/j.biocon.2009.09.005	C. B. Embling, P. A. Gillibrand, J. Gordon, J. Shrimpton, P. T. Stevick and P. S. Hammond	2010	Using habitat models to identify suitable sites for marine protected areas for harbour porpoises (Phocoena phocoena)	Biological Conservation	ecological	regional	UK	mixed
585	10.1016/j.ecolind.2012.08.017	P. Mairota, B. Cafarelli, L. Boccaccio, V. Leronni, R. Labadessa, V. Kosmidou and H. Nagendra	2013	Using landscape structure to develop quantitative baselines for protected area monitoring	Ecological Indicators	ecological	regional	IT	no opinion
586	10.1007/s10531-007-9186-2	A. S. Kallimanis, V. Ragia, S. P. Sgardelis and J. D. Pantis	2007	Using regression trees to predict alpha diversity based upon geographical and habitat characteristics	Biodiversity and Conservation	ecological	regional	GR	no opinion
587	10.1016/j.eiar.2006.06.001	R. J. W. De Nooij, K. M. Lotterman, P. de Sande, T. Pelsma, R. Leuven and H. J. R. Lenders	2006	Validity and sensitivity of a model for assessment of impacts of river floodplain reconstruction on protected and endangered species	Environmental Impact Assessment Review	ecological	regional	NL	no opinion
588	10.1007/s00267-006-0221-y	N. Strange, J. B. Jacobsen, B. J. Thorsen and P. Tarp	2007	Value for money: Protecting endangered species on Danish heathland	Environmental Management	ecological	national	DK	no opinion
589	10.1016/j.jfe.2012.05.002	D. Hoyos, P. Mariel, U. Pascual and I. Etxano	2012	Valuing a Natura 2000 network site to inform land use options using a discrete choice experiment: An illustration from the Basque Country	Journal of Forest Economics	social and policies	regional	ES	positive
590	WOS:000281933600003	Z. Rozbrojova, M. Hajek and O. Hajek	2010	Vegetation diversity of mesic meadows and pastures in the West Carpathians	Preslia	ecological	multinational	SK, CZ, PL	negative
591	10.1023/b:bioc.0000021326.50170.66	E. Dias, R. B. Elias and V. Nunes	2004	Vegetation mapping and nature conservation: a case study in Terceira Island (Azores)	Biodiversity and Conservation	ecological	regional	PT	no opinion
592	WOS:000283381700003	E. Biondi, L. Zivkovic, L. Esposito and S. Pesaresi	2009	Vegetation, plant landscape and habitat analyses of a fluvial ecosystem in central Italy	Acta Botanica Gallica	ecological	regional	IT	no opinion
593	WOS:000310716000010	J. Albert, M. Platek and L. Cizek	2012	Vertical stratification and microhabitat selection by the Great Capricorn Beetle (Cerambyx cerdo) (Coleoptera: Cerambycidae) in open-grown, veteran oaks	European Journal of Entomology	ecological	regional	CZ	no opinion
594	WOS:000283381500009	J. Izco, J. Amigo and I. Pulgar	2009	Violion caninae grasslands (Nardetea strictae) in the North and North-West of Spain	Acta Botanica Gallica	ecological	regional	ES	no opinion
595	10.1007/s10531-010-9804-2	P. Veen, J. Fanta, I. Raev, I. A. Biris, J. de Smidt and B. Maes	2010	Virgin forests in Romania and Bulgaria: results of two national inventory projects and their implications for protection	Biodiversity and Conservation	ecological	multinational	RO, BG	positive
596	10.1016/s1462-9011(03)00046-7	G. Frank and F. Muller	2003	Voluntary approaches in protection of forests in Austria	Environmental Science & Policy	social and policies	national	AT	negative
597	10.1016/j.aquabot.2007.01.011	E. C. Regan, M. S. Skeffington and M. J. Gormally	2007	Wetland plant communities of turloughs in southeast Galway/north Clare, Ireland in relation to environmental factors	Aquatic Botany	ecological	regional	IE	no opinion
598	10.1016/j.landurbplan.2013.06.012	M. Malavasi, R. Santoro, M. Cutini, A. T. R. Acosta and M. L. Carranza	2013	What has happened to coastal dunes in the last half century? A multitemporal coastal landscape analysis in Central Italy	Landscape and Urban Planning	ecological	regional	IT	positive
599	10.1016/j.ecss.2009.05.018	M. Diesing, R. Coggan and K. Vanstaen	2009	Widespread rocky reef occurrence in the central English Channel and the implications for predictive habitat mapping	Estuarine Coastal and Shelf Science	ecological	regional	UK	no opinion
600	10.4404/hystrix-23.1-6364	F. Marucco and L. Boitani	2012	Wolf population monitoring and livestock depredation preventive measures in Europe	Hystrix-Italian Journal of Mammalogy	ecological	European	EU27	positive
601	WOS:000253741000003	E. L. Frandsen, N. H. Jensen, A. Veihe and P. Frederiksen	2007	Young dry grassland ecosystems in Denmark: development in soil nutrient pools and root characteristics	Geografisk Tidsskrift-Danish Journal of Geography	ecological	regional	DK	no opinion

## Sheet: Keywords_edge_list_for_graph
ID	Source	Type_source	Target	Type_target	Type_graph	DOI	Study_type
7	iczm	location/institutions	green infrastructure	methods	undirected	10.1016/j.jnc.2011.09.001	social and policies
7	iczm	location/institutions	natura 2000	management	undirected	10.1016/j.jnc.2011.09.001	social and policies
7	iczm	location/institutions	stakeholder participation	methods	undirected	10.1016/j.jnc.2011.09.001	social and policies
8	eu	location/institutions	cbd	management	undirected	10.1016/j.biocon.2009.04.022	ecological
8	eu	location/institutions	functional traits	methods	undirected	10.1016/j.biocon.2009.04.022	ecological
8	eu	location/institutions	grazing	management	undirected	10.1016/j.biocon.2009.04.022	ecological
8	eu	location/institutions	landscape	methods	undirected	10.1016/j.biocon.2009.04.022	ecological
8	eu	location/institutions	monitoring	methods	undirected	10.1016/j.biocon.2009.04.022	ecological
8	eu	location/institutions	natura 2000	management	undirected	10.1016/j.biocon.2009.04.022	ecological
8	eu	location/institutions	seminatural grasslands	ecosystems/species	undirected	10.1016/j.biocon.2009.04.022	ecological
13	fal and helford csac	location/institutions	habitats directive	management	undirected	10.1007/s10750-005-1128-y	ecological
13	fal and helford csac	location/institutions	mpa	management	undirected	10.1007/s10750-005-1128-y	ecological
13	fal and helford csac	location/institutions	water quality	methods	undirected	10.1007/s10750-005-1128-y	ecological
16	uk	location/institutions	coastal defence	management	undirected	10.1111/1475-4959.00004	social and policies
16	uk	location/institutions	coastal management	management	undirected	10.1111/1475-4959.00004	social and policies
16	uk	location/institutions	habitats directive	management	undirected	10.1111/1475-4959.00004	social and policies
16	uk	location/institutions	natura 2000	management	undirected	10.1111/1475-4959.00004	social and policies
16	uk	location/institutions	sea-level rise	management	undirected	10.1111/1475-4959.00004	social and policies
20	sewage sludge	location/institutions	birds	ecosystems/species	undirected	10.1016/j.scitotenv.2008.09.052	ecological
20	sewage sludge	location/institutions	herbicides	management	undirected	10.1016/j.scitotenv.2008.09.052	ecological
20	sewage sludge	location/institutions	probabilistic risk assessment	methods	undirected	10.1016/j.scitotenv.2008.09.052	ecological
20	sewage sludge	location/institutions	veterinary medicinal products	ecosystems/species	undirected	10.1016/j.scitotenv.2008.09.052	ecological
22	eu	location/institutions	connectedness	methods	undirected	10.1016/j.biocon.2012.04.031	ecological
22	eu	location/institutions	connectivity	methods	undirected	10.1016/j.biocon.2012.04.031	ecological
22	eu	location/institutions	natura 2000	management	undirected	10.1016/j.biocon.2012.04.031	ecological
22	eu	location/institutions	political borders	location/institutions	undirected	10.1016/j.biocon.2012.04.031	ecological
22	eu	location/institutions	trans-boundary protected areas	management	undirected	10.1016/j.biocon.2012.04.031	ecological
22	political borders	location/institutions	connectedness	methods	undirected	10.1016/j.biocon.2012.04.031	ecological
22	political borders	location/institutions	connectivity	methods	undirected	10.1016/j.biocon.2012.04.031	ecological
22	political borders	location/institutions	natura 2000	management	undirected	10.1016/j.biocon.2012.04.031	ecological
22	political borders	location/institutions	trans-boundary protected areas	management	undirected	10.1016/j.biocon.2012.04.031	ecological
26	cee	location/institutions	grey partridge	ecosystems/species	undirected	10.3161/000164511x589857	ecological
26	cee	location/institutions	habitats	ecosystems/species	undirected	10.3161/000164511x589857	ecological
26	cee	location/institutions	land use	methods	undirected	10.3161/000164511x589857	ecological
26	cee	location/institutions	landscape ecology	methods	undirected	10.3161/000164511x589857	ecological
26	cee	location/institutions	lanius collurio	ecosystems/species	undirected	10.3161/000164511x589857	ecological
26	cee	location/institutions	matrix	methods	undirected	10.3161/000164511x589857	ecological
26	cee	location/institutions	perdix perdix	ecosystems/species	undirected	10.3161/000164511x589857	ecological
26	cee	location/institutions	red-backed shrike	ecosystems/species	undirected	10.3161/000164511x589857	ecological
28	alps	location/institutions	conservation priorities	methods	undirected	10.1007/s10531-009-9609-3	ecological
28	alps	location/institutions	natura 2000	management	undirected	10.1007/s10531-009-9609-3	ecological
28	alps	location/institutions	plant endemism	methods	undirected	10.1007/s10531-009-9609-3	ecological
28	alps	location/institutions	threatened flora	ecosystems/species	undirected	10.1007/s10531-009-9609-3	ecological
30	hybrid agency	location/institutions	hybridity	methods	undirected	10.1016/j.jrurstud.2011.09.002	social and policies
30	hybrid agency	location/institutions	natura 2000	management	undirected	10.1016/j.jrurstud.2011.09.002	social and policies
30	hybrid agency	location/institutions	naturalness	methods	undirected	10.1016/j.jrurstud.2011.09.002	social and policies
30	hybrid agency	location/institutions	nature conservation	management	undirected	10.1016/j.jrurstud.2011.09.002	social and policies
30	hybrid agency	location/institutions	nature-society boundaries	methods	undirected	10.1016/j.jrurstud.2011.09.002	social and policies
30	hybrid agency	location/institutions	protected areas	management	undirected	10.1016/j.jrurstud.2011.09.002	social and policies
30	hybrid agency	location/institutions	relationality	methods	undirected	10.1016/j.jrurstud.2011.09.002	social and policies
30	hybrid agency	location/institutions	uncertainty	methods	undirected	10.1016/j.jrurstud.2011.09.002	social and policies
31	cee	location/institutions	biodiversity governance	management	undirected	10.1017/S0376892912000355	ecological
31	cee	location/institutions	deforestation	management	undirected	10.1017/S0376892912000355	ecological
31	cee	location/institutions	disturbance	methods	undirected	10.1017/S0376892912000355	ecological
31	cee	location/institutions	forest restitution	management	undirected	10.1017/S0376892912000355	ecological
31	cee	location/institutions	landsat	methods	undirected	10.1017/S0376892912000355	ecological
31	cee	location/institutions	natura 2000	management	undirected	10.1017/S0376892912000355	ecological
31	cee	location/institutions	old-growth forests	ecosystems/species	undirected	10.1017/S0376892912000355	ecological
31	cee	location/institutions	protected areas	management	undirected	10.1017/S0376892912000355	ecological
31	cee	location/institutions	remote sensing	methods	undirected	10.1017/S0376892912000355	ecological
35	coastal	location/institutions	biodiversity	management	undirected	10.1002/aqc.2273	ecological
35	coastal	location/institutions	birds	ecosystems/species	undirected	10.1002/aqc.2273	ecological
35	coastal	location/institutions	ecosystem approach	methods	undirected	10.1002/aqc.2273	ecological
35	coastal	location/institutions	fishing effort	methods	undirected	10.1002/aqc.2273	ecological
35	coastal	location/institutions	habitats directive	management	undirected	10.1002/aqc.2273	ecological
35	coastal	location/institutions	invertebrates	ecosystems/species	undirected	10.1002/aqc.2273	ecological
35	coastal	location/institutions	lagoon	location/institutions	undirected	10.1002/aqc.2273	ecological
35	coastal	location/institutions	mammals	ecosystems/species	undirected	10.1002/aqc.2273	ecological
35	coastal	location/institutions	recreation	management	undirected	10.1002/aqc.2273	ecological
35	lagoon	location/institutions	biodiversity	management	undirected	10.1002/aqc.2273	ecological
35	lagoon	location/institutions	birds	ecosystems/species	undirected	10.1002/aqc.2273	ecological
35	lagoon	location/institutions	ecosystem approach	methods	undirected	10.1002/aqc.2273	ecological
35	lagoon	location/institutions	fishing effort	methods	undirected	10.1002/aqc.2273	ecological
35	lagoon	location/institutions	habitats directive	management	undirected	10.1002/aqc.2273	ecological
35	lagoon	location/institutions	invertebrates	ecosystems/species	undirected	10.1002/aqc.2273	ecological
35	lagoon	location/institutions	mammals	ecosystems/species	undirected	10.1002/aqc.2273	ecological
35	lagoon	location/institutions	recreation	management	undirected	10.1002/aqc.2273	ecological
36	spain	location/institutions	insects	ecosystems/species	undirected	10.1111/j.1752-4598.2011.00175.x	ecological
36	spain	location/institutions	molluscs	ecosystems/species	undirected	10.1111/j.1752-4598.2011.00175.x	ecological
36	spain	location/institutions	protected areas	management	undirected	10.1111/j.1752-4598.2011.00175.x	ecological
36	spain	location/institutions	species representation	methods	undirected	10.1111/j.1752-4598.2011.00175.x	ecological
36	spain	location/institutions	threatened species	ecosystems/species	undirected	10.1111/j.1752-4598.2011.00175.x	ecological
37	mediterranean sea	location/institutions	biodiversity	management	undirected	10.1016/j.biocon.2010.11.006	ecological
37	mediterranean sea	location/institutions	conservation planning	methods	undirected	10.1016/j.biocon.2010.11.006	ecological
37	mediterranean sea	location/institutions	mpa	management	undirected	10.1016/j.biocon.2010.11.006	ecological
37	mediterranean sea	location/institutions	socio-economic	methods	undirected	10.1016/j.biocon.2010.11.006	ecological
37	mediterranean sea	location/institutions	wind exposure	methods	undirected	10.1016/j.biocon.2010.11.006	ecological
40	eu	location/institutions	distribution range	methods	undirected	10.1007/s10531-008-9439-8	ecological
40	eu	location/institutions	evaluation methods	methods	undirected	10.1007/s10531-008-9439-8	ecological
40	eu	location/institutions	international importance	management	undirected	10.1007/s10531-008-9439-8	ecological
40	eu	location/institutions	national responsibility	management	undirected	10.1007/s10531-008-9439-8	ecological
40	eu	location/institutions	species conservation	management	undirected	10.1007/s10531-008-9439-8	ecological
42	scotland	location/institutions	biodiversity conflict	management	undirected	10.1016/j.biocon.2012.08.018	social and policies
42	scotland	location/institutions	natura 2000	management	undirected	10.1016/j.biocon.2012.08.018	social and policies
42	scotland	location/institutions	public participation	management	undirected	10.1016/j.biocon.2012.08.018	social and policies
42	scotland	location/institutions	sci	management	undirected	10.1016/j.biocon.2012.08.018	social and policies
42	scotland	location/institutions	stakeholder participation	methods	undirected	10.1016/j.biocon.2012.08.018	social and policies
43	baltic sea	location/institutions	connectivity	methods	undirected	10.1111/j.1365-2664.2010.01892.x	ecological
43	baltic sea	location/institutions	essential fish habitats	ecosystems/species	undirected	10.1111/j.1365-2664.2010.01892.x	ecological
43	baltic sea	location/institutions	habitat modelling	methods	undirected	10.1111/j.1365-2664.2010.01892.x	ecological
43	baltic sea	location/institutions	habitats directive	management	undirected	10.1111/j.1365-2664.2010.01892.x	ecological
43	baltic sea	location/institutions	mpa	management	undirected	10.1111/j.1365-2664.2010.01892.x	ecological
43	baltic sea	location/institutions	natura 2000	management	undirected	10.1111/j.1365-2664.2010.01892.x	ecological
45	small water bodies	location/institutions	biodiversity	management	undirected	10.1007/s10750-007-9225-8	ecological
45	small water bodies	location/institutions	conservation	management	undirected	10.1007/s10750-007-9225-8	ecological
45	small water bodies	location/institutions	ecosystem services	methods	undirected	10.1007/s10750-007-9225-8	ecological
45	small water bodies	location/institutions	european pond conservation network	management	undirected	10.1007/s10750-007-9225-8	ecological
45	small water bodies	location/institutions	temporary ponds	ecosystems/species	undirected	10.1007/s10750-007-9225-8	ecological
45	small water bodies	location/institutions	water policy	management	undirected	10.1007/s10750-007-9225-8	ecological
45	small water bodies	location/institutions	wetlands	ecosystems/species	undirected	10.1007/s10750-007-9225-8	ecological
47	iberian	location/institutions	complementarity	methods	undirected	10.1111/j.1523-1739.2007.00827.x	ecological
47	iberian	location/institutions	conservation planning	methods	undirected	10.1111/j.1523-1739.2007.00827.x	ecological
47	iberian	location/institutions	gap analysis	methods	undirected	10.1111/j.1523-1739.2007.00827.x	ecological
47	iberian	location/institutions	natura 2000	management	undirected	10.1111/j.1523-1739.2007.00827.x	ecological
47	iberian	location/institutions	reserve design	methods	undirected	10.1111/j.1523-1739.2007.00827.x	ecological
48	mediterranean river basin	location/institutions	freshwater biodiversity	methods	undirected	10.1002/aqc.778	ecological
48	mediterranean river basin	location/institutions	gap analysis	methods	undirected	10.1002/aqc.778	ecological
48	mediterranean river basin	location/institutions	protected areas	management	undirected	10.1002/aqc.778	ecological
48	mediterranean river basin	location/institutions	representation	methods	undirected	10.1002/aqc.778	ecological
48	mediterranean river basin	location/institutions	water beetles	ecosystems/species	undirected	10.1002/aqc.778	ecological
50	eu	location/institutions	eia	methods	undirected	10.1016/j.landusepol.2012.05.006	social and policies
50	eu	location/institutions	french law	management	undirected	10.1016/j.landusepol.2012.05.006	social and policies
50	eu	location/institutions	international	management	undirected	10.1016/j.landusepol.2012.05.006	social and policies
50	eu	location/institutions	road project	management	undirected	10.1016/j.landusepol.2012.05.006	social and policies
51	romania	location/institutions	effectiveness	methods	undirected	10.1016/j.biocon.2010.06.013	ecological
51	romania	location/institutions	management	management	undirected	10.1016/j.biocon.2010.06.013	ecological
51	romania	location/institutions	natura 2000	management	undirected	10.1016/j.biocon.2010.06.013	ecological
51	romania	location/institutions	protected areas	management	undirected	10.1016/j.biocon.2010.06.013	ecological
51	romania	location/institutions	reserve network	management	undirected	10.1016/j.biocon.2010.06.013	ecological
53	cee	location/institutions	eu	location/institutions	undirected	10.1007/s10531-010-9777-1	social and policies
53	cee	location/institutions	genetic diversity	methods	undirected	10.1007/s10531-010-9777-1	social and policies
53	cee	location/institutions	glacial refugia	methods	undirected	10.1007/s10531-010-9777-1	social and policies
53	cee	location/institutions	phylogeography	methods	undirected	10.1007/s10531-010-9777-1	social and policies
53	cee	location/institutions	proactive conservation	methods	undirected	10.1007/s10531-010-9777-1	social and policies
53	eu	location/institutions	genetic diversity	methods	undirected	10.1007/s10531-010-9777-1	social and policies
53	eu	location/institutions	glacial refugia	methods	undirected	10.1007/s10531-010-9777-1	social and policies
53	eu	location/institutions	phylogeography	methods	undirected	10.1007/s10531-010-9777-1	social and policies
53	eu	location/institutions	proactive conservation	methods	undirected	10.1007/s10531-010-9777-1	social and policies
55	alps	location/institutions	discrete-choice model	methods	undirected	10.1016/j.biocon.2011.03.010	ecological
55	alps	location/institutions	habitat selection	methods	undirected	10.1016/j.biocon.2011.03.010	ecological
55	alps	location/institutions	habitats directive	management	undirected	10.1016/j.biocon.2011.03.010	ecological
55	alps	location/institutions	potential population size	methods	undirected	10.1016/j.biocon.2011.03.010	ecological
55	alps	location/institutions	ursus arctos	ecosystems/species	undirected	10.1016/j.biocon.2011.03.010	ecological
63	carpathians	location/institutions	environmental attitudes	methods	undirected	10.1016/j.jnc.2012.05.005	social and policies
63	carpathians	location/institutions	local communities	management	undirected	10.1016/j.jnc.2012.05.005	social and policies
63	carpathians	location/institutions	natura 2000	management	undirected	10.1016/j.jnc.2012.05.005	social and policies
63	carpathians	location/institutions	poland	location/institutions	undirected	10.1016/j.jnc.2012.05.005	social and policies
63	carpathians	location/institutions	protected areas	management	undirected	10.1016/j.jnc.2012.05.005	social and policies
63	poland	location/institutions	environmental attitudes	methods	undirected	10.1016/j.jnc.2012.05.005	social and policies
63	poland	location/institutions	natura 2000	management	undirected	10.1016/j.jnc.2012.05.005	social and policies
63	poland	location/institutions	protected areas	management	undirected	10.1016/j.jnc.2012.05.005	social and policies
64	alps	location/institutions	aerial photography	methods	undirected	10.1007/s00267-010-9601-4	social and policies
64	alps	location/institutions	forest cover change	methods	undirected	10.1007/s00267-010-9601-4	social and policies
64	alps	location/institutions	forestry maps	methods	undirected	10.1007/s00267-010-9601-4	social and policies
64	alps	location/institutions	gis	methods	undirected	10.1007/s00267-010-9601-4	social and policies
64	alps	location/institutions	historical	methods	undirected	10.1007/s00267-010-9601-4	social and policies
64	alps	location/institutions	historical landscape	management	undirected	10.1007/s00267-010-9601-4	social and policies
64	alps	location/institutions	markov chains	methods	undirected	10.1007/s00267-010-9601-4	social and policies
64	alps	location/institutions	natura 2000	management	undirected	10.1007/s00267-010-9601-4	social and policies
64	alps	location/institutions	paneveggio	location/institutions	undirected	10.1007/s00267-010-9601-4	social and policies
64	alps	location/institutions	protected area management	management	undirected	10.1007/s00267-010-9601-4	social and policies
64	paneveggio	location/institutions	aerial photography	methods	undirected	10.1007/s00267-010-9601-4	social and policies
64	paneveggio	location/institutions	forest cover change	methods	undirected	10.1007/s00267-010-9601-4	social and policies
64	paneveggio	location/institutions	forestry maps	methods	undirected	10.1007/s00267-010-9601-4	social and policies
64	paneveggio	location/institutions	gis	methods	undirected	10.1007/s00267-010-9601-4	social and policies
64	paneveggio	location/institutions	historical	methods	undirected	10.1007/s00267-010-9601-4	social and policies
64	paneveggio	location/institutions	historical landscape	management	undirected	10.1007/s00267-010-9601-4	social and policies
64	paneveggio	location/institutions	markov chains	methods	undirected	10.1007/s00267-010-9601-4	social and policies
64	paneveggio	location/institutions	natura 2000	management	undirected	10.1007/s00267-010-9601-4	social and policies
64	paneveggio	location/institutions	protected area management	management	undirected	10.1007/s00267-010-9601-4	social and policies
66	ionian sea	location/institutions	biomass removal	methods	undirected	10.1111/j.1365-2400.2010.00764.x	ecological
66	ionian sea	location/institutions	fishery management	management	undirected	10.1111/j.1365-2400.2010.00764.x	ecological
66	ionian sea	location/institutions	mediterranean sea	location/institutions	undirected	10.1111/j.1365-2400.2010.00764.x	ecological
66	ionian sea	location/institutions	overfishing	management	undirected	10.1111/j.1365-2400.2010.00764.x	ecological
66	mediterranean sea	location/institutions	biomass removal	methods	undirected	10.1111/j.1365-2400.2010.00764.x	ecological
66	mediterranean sea	location/institutions	fishery management	management	undirected	10.1111/j.1365-2400.2010.00764.x	ecological
66	mediterranean sea	location/institutions	overfishing	management	undirected	10.1111/j.1365-2400.2010.00764.x	ecological
68	azores	location/institutions	azorean endemic	management	undirected	10.1600/036364411x604868	ecological
68	azores	location/institutions	dna barcoding	methods	undirected	10.1600/036364411x604868	ecological
68	azores	location/institutions	invasive ferns	ecosystems/species	undirected	10.1600/036364411x604868	ecological
68	azores	location/institutions	molecular phylogenetics	methods	undirected	10.1600/036364411x604868	ecological
71	ecoregions	location/institutions	biogeography conservation	methods	undirected	10.1556/ComEc.9.2008.2.3	ecological
71	ecoregions	location/institutions	italy	location/institutions	undirected	10.1556/ComEc.9.2008.2.3	ecological
71	ecoregions	location/institutions	natura 2000	management	undirected	10.1556/ComEc.9.2008.2.3	ecological
71	italy	location/institutions	biogeography conservation	methods	undirected	10.1556/ComEc.9.2008.2.3	ecological
71	italy	location/institutions	natura 2000	management	undirected	10.1556/ComEc.9.2008.2.3	ecological
73	basque country	location/institutions	corridors	management	undirected	10.1016/j.jnc.2010.01.005	ecological
73	basque country	location/institutions	landscape ecology	methods	undirected	10.1016/j.jnc.2010.01.005	ecological
73	basque country	location/institutions	least-cost modelling	methods	undirected	10.1016/j.jnc.2010.01.005	ecological
73	basque country	location/institutions	medium and large sized mammals	ecosystems/species	undirected	10.1016/j.jnc.2010.01.005	ecological
73	basque country	location/institutions	natura 2000	management	undirected	10.1016/j.jnc.2010.01.005	ecological
74	cee	location/institutions	conservation	management	undirected	10.1017/S0376892912000288	social and policies
74	cee	location/institutions	institutional change	management	undirected	10.1017/S0376892912000288	social and policies
74	cee	location/institutions	natura 2000	management	undirected	10.1017/S0376892912000288	social and policies
74	cee	location/institutions	policy arrangement	methods	undirected	10.1017/S0376892912000288	social and policies
76	alboran sea	location/institutions	barcelona convention	management	undirected	10.1002/aqc.689	ecological
76	alboran sea	location/institutions	cetaceans	ecosystems/species	undirected	10.1002/aqc.689	ecological
76	alboran sea	location/institutions	glm	methods	undirected	10.1002/aqc.689	ecological
76	alboran sea	location/institutions	habitat selection	methods	undirected	10.1002/aqc.689	ecological
76	alboran sea	location/institutions	habitats directive	management	undirected	10.1002/aqc.689	ecological
76	alboran sea	location/institutions	linear models	methods	undirected	10.1002/aqc.689	ecological
76	alboran sea	location/institutions	mediterranean sea	location/institutions	undirected	10.1002/aqc.689	ecological
76	alboran sea	location/institutions	mpa	management	undirected	10.1002/aqc.689	ecological
76	alboran sea	location/institutions	odontocetes	ecosystems/species	undirected	10.1002/aqc.689	ecological
76	mediterranean sea	location/institutions	barcelona convention	management	undirected	10.1002/aqc.689	ecological
76	mediterranean sea	location/institutions	cetaceans	ecosystems/species	undirected	10.1002/aqc.689	ecological
76	mediterranean sea	location/institutions	glm	methods	undirected	10.1002/aqc.689	ecological
76	mediterranean sea	location/institutions	habitat selection	methods	undirected	10.1002/aqc.689	ecological
76	mediterranean sea	location/institutions	habitats directive	management	undirected	10.1002/aqc.689	ecological
76	mediterranean sea	location/institutions	linear models	methods	undirected	10.1002/aqc.689	ecological
76	mediterranean sea	location/institutions	mpa	management	undirected	10.1002/aqc.689	ecological
76	mediterranean sea	location/institutions	odontocetes	ecosystems/species	undirected	10.1002/aqc.689	ecological
78	eu	location/institutions	arthropods	ecosystems/species	undirected	10.1111/j.1752-4598.2011.00140.x	ecological
78	eu	location/institutions	conservation priorities	methods	undirected	10.1111/j.1752-4598.2011.00140.x	ecological
78	eu	location/institutions	environmental policy	management	undirected	10.1111/j.1752-4598.2011.00140.x	ecological
78	eu	location/institutions	insects	ecosystems/species	undirected	10.1111/j.1752-4598.2011.00140.x	ecological
78	eu	location/institutions	iucn red list	management	undirected	10.1111/j.1752-4598.2011.00140.x	ecological
78	eu	location/institutions	life nature	location/institutions	undirected	10.1111/j.1752-4598.2011.00140.x	ecological
78	eu	location/institutions	spiders	ecosystems/species	undirected	10.1111/j.1752-4598.2011.00140.x	ecological
78	eu	location/institutions	threatened species	ecosystems/species	undirected	10.1111/j.1752-4598.2011.00140.x	ecological
78	life nature	location/institutions	arthropods	ecosystems/species	undirected	10.1111/j.1752-4598.2011.00140.x	ecological
78	life nature	location/institutions	conservation priorities	methods	undirected	10.1111/j.1752-4598.2011.00140.x	ecological
78	life nature	location/institutions	environmental policy	management	undirected	10.1111/j.1752-4598.2011.00140.x	ecological
78	life nature	location/institutions	insects	ecosystems/species	undirected	10.1111/j.1752-4598.2011.00140.x	ecological
78	life nature	location/institutions	iucn red list	management	undirected	10.1111/j.1752-4598.2011.00140.x	ecological
78	life nature	location/institutions	spiders	ecosystems/species	undirected	10.1111/j.1752-4598.2011.00140.x	ecological
78	life nature	location/institutions	threatened species	ecosystems/species	undirected	10.1111/j.1752-4598.2011.00140.x	ecological
80	portugal	location/institutions	biodiversity hotspots	methods	undirected	10.1016/j.actao.2011.05.004	ecological
80	portugal	location/institutions	conservation	management	undirected	10.1016/j.actao.2011.05.004	ecological
80	portugal	location/institutions	gap analysis	methods	undirected	10.1016/j.actao.2011.05.004	ecological
80	portugal	location/institutions	natura 2000	management	undirected	10.1016/j.actao.2011.05.004	ecological
80	portugal	location/institutions	protected areas	management	undirected	10.1016/j.actao.2011.05.004	ecological
80	portugal	location/institutions	spain	location/institutions	undirected	10.1016/j.actao.2011.05.004	ecological
80	spain	location/institutions	biodiversity hotspots	methods	undirected	10.1016/j.actao.2011.05.004	ecological
80	spain	location/institutions	conservation	management	undirected	10.1016/j.actao.2011.05.004	ecological
80	spain	location/institutions	gap analysis	methods	undirected	10.1016/j.actao.2011.05.004	ecological
80	spain	location/institutions	natura 2000	management	undirected	10.1016/j.actao.2011.05.004	ecological
80	spain	location/institutions	protected areas	management	undirected	10.1016/j.actao.2011.05.004	ecological
86	soil	location/institutions	elevation	methods	undirected	10.1890/07-0662.1	ecological
86	soil	location/institutions	human population density	methods	undirected	10.1890/07-0662.1	ecological
86	soil	location/institutions	land use	methods	undirected	10.1890/07-0662.1	ecological
86	soil	location/institutions	private lands	management	undirected	10.1890/07-0662.1	ecological
86	soil	location/institutions	protected areas	management	undirected	10.1890/07-0662.1	ecological
86	soil	location/institutions	public lands	management	undirected	10.1890/07-0662.1	ecological
86	soil	location/institutions	statutory	methods	undirected	10.1890/07-0662.1	ecological
86	soil	location/institutions	uk	location/institutions	undirected	10.1890/07-0662.1	ecological
86	uk	location/institutions	elevation	methods	undirected	10.1890/07-0662.1	ecological
86	uk	location/institutions	human population density	methods	undirected	10.1890/07-0662.1	ecological
86	uk	location/institutions	land use	methods	undirected	10.1890/07-0662.1	ecological
86	uk	location/institutions	private lands	management	undirected	10.1890/07-0662.1	ecological
86	uk	location/institutions	protected areas	management	undirected	10.1890/07-0662.1	ecological
86	uk	location/institutions	public lands	management	undirected	10.1890/07-0662.1	ecological
86	uk	location/institutions	statutory	methods	undirected	10.1890/07-0662.1	ecological
87	bulgaria	location/institutions	diversity	methods	undirected	10.1017/S0030605310000530	ecological
87	bulgaria	location/institutions	mire	ecosystems/species	undirected	10.1017/S0030605310000530	ecological
87	bulgaria	location/institutions	natura 2000	management	undirected	10.1017/S0030605310000530	ecological
87	bulgaria	location/institutions	peatlands	ecosystems/species	undirected	10.1017/S0030605310000530	ecological
87	bulgaria	location/institutions	rare species	ecosystems/species	undirected	10.1017/S0030605310000530	ecological
87	bulgaria	location/institutions	refugia	methods	undirected	10.1017/S0030605310000530	ecological
87	bulgaria	location/institutions	wetlands	ecosystems/species	undirected	10.1017/S0030605310000530	ecological
89	romania	location/institutions	biodiversity governance	management	undirected	10.1017/S0376892912000392	social and policies
89	romania	location/institutions	cap	management	undirected	10.1017/S0376892912000392	social and policies
89	romania	location/institutions	farmland biodiversity	ecosystems/species	undirected	10.1017/S0376892912000392	social and policies
89	romania	location/institutions	high nature value farmland	management	undirected	10.1017/S0376892912000392	social and policies
89	romania	location/institutions	multi-level governance	methods	undirected	10.1017/S0376892912000392	social and policies
89	romania	location/institutions	transylvania	location/institutions	undirected	10.1017/S0376892912000392	social and policies
89	transylvania	location/institutions	biodiversity governance	management	undirected	10.1017/S0376892912000392	social and policies
89	transylvania	location/institutions	cap	management	undirected	10.1017/S0376892912000392	social and policies
89	transylvania	location/institutions	farmland biodiversity	ecosystems/species	undirected	10.1017/S0376892912000392	social and policies
89	transylvania	location/institutions	high nature value farmland	management	undirected	10.1017/S0376892912000392	social and policies
89	transylvania	location/institutions	multi-level governance	methods	undirected	10.1017/S0376892912000392	social and policies
94	eu	location/institutions	conservation	management	undirected	10.1016/s0006-3207(99)00009-9	ecological
94	eu	location/institutions	iucn red list	management	undirected	10.1016/s0006-3207(99)00009-9	ecological
94	eu	location/institutions	legal protection	management	undirected	10.1016/s0006-3207(99)00009-9	ecological
94	eu	location/institutions	mollusca	ecosystems/species	undirected	10.1016/s0006-3207(99)00009-9	ecological
94	eu	location/institutions	threatened species	ecosystems/species	undirected	10.1016/s0006-3207(99)00009-9	ecological
100	bays	location/institutions	gis	methods	undirected	10.1093/icesjms/fsn005	ecological
100	bays	location/institutions	habitats	ecosystems/species	undirected	10.1093/icesjms/fsn005	ecological
100	bays	location/institutions	habitats directive	management	undirected	10.1093/icesjms/fsn005	ecological
100	bays	location/institutions	inlets	location/institutions	undirected	10.1093/icesjms/fsn005	ecological
100	bays	location/institutions	modelling	methods	undirected	10.1093/icesjms/fsn005	ecological
100	bays	location/institutions	natura 2000	management	undirected	10.1093/icesjms/fsn005	ecological
100	inlets	location/institutions	gis	methods	undirected	10.1093/icesjms/fsn005	ecological
100	inlets	location/institutions	habitats	ecosystems/species	undirected	10.1093/icesjms/fsn005	ecological
100	inlets	location/institutions	habitats directive	management	undirected	10.1093/icesjms/fsn005	ecological
100	inlets	location/institutions	modelling	methods	undirected	10.1093/icesjms/fsn005	ecological
100	inlets	location/institutions	natura 2000	management	undirected	10.1093/icesjms/fsn005	ecological
101	ospar	location/institutions	birds directive	management	undirected	10.1016/j.marpol.2012.12.002	social and policies
101	ospar	location/institutions	cbd	management	undirected	10.1016/j.marpol.2012.12.002	social and policies
101	ospar	location/institutions	habitats directive	management	undirected	10.1016/j.marpol.2012.12.002	social and policies
101	ospar	location/institutions	mpa	management	undirected	10.1016/j.marpol.2012.12.002	social and policies
101	ospar	location/institutions	natura 2000	management	undirected	10.1016/j.marpol.2012.12.002	social and policies
101	ospar	location/institutions	spatial conservation planning	methods	undirected	10.1016/j.marpol.2012.12.002	social and policies
105	mountain areas	location/institutions	deterioration management plan	methods	undirected	10.1078/1617-1381-00066	social and policies
105	mountain areas	location/institutions	natura 2000	management	undirected	10.1078/1617-1381-00066	social and policies
105	mountain areas	location/institutions	nature-based sport	management	undirected	10.1078/1617-1381-00066	social and policies
105	mountain areas	location/institutions	outdoor recreation	management	undirected	10.1078/1617-1381-00066	social and policies
110	italy	location/institutions	conservation policy	management	undirected	10.1080/1523908x.2010.505417	social and policies
110	italy	location/institutions	habitats directive	management	undirected	10.1080/1523908x.2010.505417	social and policies
110	italy	location/institutions	law	management	undirected	10.1080/1523908x.2010.505417	social and policies
110	italy	location/institutions	natura 2000	management	undirected	10.1080/1523908x.2010.505417	social and policies
110	italy	location/institutions	netherlands	location/institutions	undirected	10.1080/1523908x.2010.505417	social and policies
110	netherlands	location/institutions	conservation policy	management	undirected	10.1080/1523908x.2010.505417	social and policies
110	netherlands	location/institutions	habitats directive	management	undirected	10.1080/1523908x.2010.505417	social and policies
110	netherlands	location/institutions	law	management	undirected	10.1080/1523908x.2010.505417	social and policies
110	netherlands	location/institutions	natura 2000	management	undirected	10.1080/1523908x.2010.505417	social and policies
111	baltic sea	location/institutions	eia	methods	undirected	10.1093/icesjms/fsn193	ecological
111	baltic sea	location/institutions	fishing effort	methods	undirected	10.1093/icesjms/fsn193	ecological
111	baltic sea	location/institutions	management	management	undirected	10.1093/icesjms/fsn193	ecological
111	baltic sea	location/institutions	mpa	management	undirected	10.1093/icesjms/fsn193	ecological
111	baltic sea	location/institutions	natura 2000	management	undirected	10.1093/icesjms/fsn193	ecological
111	baltic sea	location/institutions	north sea	location/institutions	undirected	10.1093/icesjms/fsn193	ecological
111	north sea	location/institutions	eia	methods	undirected	10.1093/icesjms/fsn193	ecological
111	north sea	location/institutions	fishing effort	methods	undirected	10.1093/icesjms/fsn193	ecological
111	north sea	location/institutions	management	management	undirected	10.1093/icesjms/fsn193	ecological
111	north sea	location/institutions	mpa	management	undirected	10.1093/icesjms/fsn193	ecological
111	north sea	location/institutions	natura 2000	management	undirected	10.1093/icesjms/fsn193	ecological
113	carpathians	location/institutions	cee	location/institutions	undirected	10.1016/j.envpol.2003.10.028	ecological
113	carpathians	location/institutions	nature conservation	management	undirected	10.1016/j.envpol.2003.10.028	ecological
113	carpathians	location/institutions	nature protection	management	undirected	10.1016/j.envpol.2003.10.028	ecological
113	carpathians	location/institutions	protected areas	management	undirected	10.1016/j.envpol.2003.10.028	ecological
113	cee	location/institutions	nature conservation	management	undirected	10.1016/j.envpol.2003.10.028	ecological
113	cee	location/institutions	nature protection	management	undirected	10.1016/j.envpol.2003.10.028	ecological
113	cee	location/institutions	protected areas	management	undirected	10.1016/j.envpol.2003.10.028	ecological
114	greece	location/institutions	conservation policy	management	undirected	10.1016/j.envsci.2006.03.003	social and policies
114	greece	location/institutions	ecosystem management	methods	undirected	10.1016/j.envsci.2006.03.003	social and policies
114	greece	location/institutions	integrative planning	methods	undirected	10.1016/j.envsci.2006.03.003	social and policies
114	greece	location/institutions	natura 2000	management	undirected	10.1016/j.envsci.2006.03.003	social and policies
116	darwin mounds	location/institutions	cfp	management	undirected	10.1016/j.marpol.2006.10.001	social and policies
116	darwin mounds	location/institutions	greenpeace judgment	management	undirected	10.1016/j.marpol.2006.10.001	social and policies
116	darwin mounds	location/institutions	habitats directive	management	undirected	10.1016/j.marpol.2006.10.001	social and policies
116	darwin mounds	location/institutions	precautionary principle	management	undirected	10.1016/j.marpol.2006.10.001	social and policies
116	darwin mounds	location/institutions	uk pair-trawl ban	management	undirected	10.1016/j.marpol.2006.10.001	social and policies
116	darwin mounds	location/institutions	wadden sea judgment	management	undirected	10.1016/j.marpol.2006.10.001	social and policies
118	baltic sea	location/institutions	large-scale technical installations	location/institutions	undirected	WOS:000279919300013	ecological
118	baltic sea	location/institutions	maritime regulations	management	undirected	WOS:000279919300013	ecological
118	baltic sea	location/institutions	maritime spatial planning	management	undirected	WOS:000279919300013	ecological
118	large-scale technical installations	location/institutions	maritime regulations	management	undirected	WOS:000279919300013	ecological
118	large-scale technical installations	location/institutions	maritime spatial planning	management	undirected	WOS:000279919300013	ecological
119	eu	location/institutions	condition assessment	methods	undirected	10.1111/j.1475-4959.2010.00391.x	ecological
119	eu	location/institutions	participation	management	undirected	10.1111/j.1475-4959.2010.00391.x	ecological
119	eu	location/institutions	perceptions	methods	undirected	10.1111/j.1475-4959.2010.00391.x	ecological
119	eu	location/institutions	protected area management	management	undirected	10.1111/j.1475-4959.2010.00391.x	ecological
119	eu	location/institutions	qualitative meta-analysis	methods	undirected	10.1111/j.1475-4959.2010.00391.x	ecological
120	cee	location/institutions	communism	management	undirected	10.1017/S0376892913000039	social and policies
120	cee	location/institutions	eu	location/institutions	undirected	10.1017/S0376892913000039	social and policies
120	cee	location/institutions	multi-level governance	methods	undirected	10.1017/S0376892913000039	social and policies
120	cee	location/institutions	natura 2000	management	undirected	10.1017/S0376892913000039	social and policies
120	cee	location/institutions	transition	management	undirected	10.1017/S0376892913000039	social and policies
120	eu	location/institutions	communism	management	undirected	10.1017/S0376892913000039	social and policies
120	eu	location/institutions	multi-level governance	methods	undirected	10.1017/S0376892913000039	social and policies
120	eu	location/institutions	natura 2000	management	undirected	10.1017/S0376892913000039	social and policies
120	eu	location/institutions	transition	management	undirected	10.1017/S0376892913000039	social and policies
121	crete	location/institutions	biodiversity conservation	management	undirected	10.1016/j.jenvman.2012.09.006	social and policies
121	crete	location/institutions	governance	management	undirected	10.1016/j.jenvman.2012.09.006	social and policies
121	crete	location/institutions	knowledge	methods	undirected	10.1016/j.jenvman.2012.09.006	social and policies
121	crete	location/institutions	local communities	management	undirected	10.1016/j.jenvman.2012.09.006	social and policies
121	crete	location/institutions	natura 2000	management	undirected	10.1016/j.jenvman.2012.09.006	social and policies
122	netherlands	location/institutions	directives	management	undirected	10.1016/j.landusepol.2012.07.009	social and policies
122	netherlands	location/institutions	implementation	management	undirected	10.1016/j.landusepol.2012.07.009	social and policies
122	netherlands	location/institutions	nature conservation	management	undirected	10.1016/j.landusepol.2012.07.009	social and policies
122	netherlands	location/institutions	performativity	methods	undirected	10.1016/j.landusepol.2012.07.009	social and policies
124	spain	location/institutions	conservation	management	undirected	10.1016/j.jnc.2012.06.001	ecological
124	spain	location/institutions	enfa	methods	undirected	10.1016/j.jnc.2012.06.001	ecological
124	spain	location/institutions	gap analysis	methods	undirected	10.1016/j.jnc.2012.06.001	ecological
124	spain	location/institutions	non-charismatic species	ecosystems/species	undirected	10.1016/j.jnc.2012.06.001	ecological
124	spain	location/institutions	sdm	methods	undirected	10.1016/j.jnc.2012.06.001	ecological
126	fennoscandia	location/institutions	aquatic vegetation	ecosystems/species	undirected	10.1007/s10750-010-0424-3	ecological
126	fennoscandia	location/institutions	habitats directive	management	undirected	10.1007/s10750-010-0424-3	ecological
126	fennoscandia	location/institutions	iucn red list	management	undirected	10.1007/s10750-010-0424-3	ecological
126	fennoscandia	location/institutions	natura 2000	management	undirected	10.1007/s10750-010-0424-3	ecological
126	fennoscandia	location/institutions	wfd	management	undirected	10.1007/s10750-010-0424-3	ecological
129	eu	location/institutions	biodiversity	management	undirected	10.1196/annals.1439.006	ecological
129	eu	location/institutions	conservation planning	methods	undirected	10.1196/annals.1439.006	ecological
129	eu	location/institutions	natura 2000	management	undirected	10.1196/annals.1439.006	ecological
129	eu	location/institutions	protected areas	management	undirected	10.1196/annals.1439.006	ecological
130	pyrenees	location/institutions	biodiversity	management	undirected	WOS:000308651400009	ecological
130	pyrenees	location/institutions	gbif	methods	undirected	WOS:000308651400009	ecological
130	pyrenees	location/institutions	protected areas	management	undirected	WOS:000308651400009	ecological
130	pyrenees	location/institutions	species richness	methods	undirected	WOS:000308651400009	ecological
134	mediterranean biogeographic region	location/institutions	adaptive management	management	undirected	10.1007/s10531-010-9835-8	ecological
134	mediterranean biogeographic region	location/institutions	asexual regeneration	methods	undirected	10.1007/s10531-010-9835-8	ecological
134	mediterranean biogeographic region	location/institutions	cattle	ecosystems/species	undirected	10.1007/s10531-010-9835-8	ecological
134	mediterranean biogeographic region	location/institutions	coppice forest	ecosystems/species	undirected	10.1007/s10531-010-9835-8	ecological
134	mediterranean biogeographic region	location/institutions	gis	methods	undirected	10.1007/s10531-010-9835-8	ecological
134	mediterranean biogeographic region	location/institutions	oak	ecosystems/species	undirected	10.1007/s10531-010-9835-8	ecological
134	mediterranean biogeographic region	location/institutions	quercus pyrenaica	ecosystems/species	undirected	10.1007/s10531-010-9835-8	ecological
134	mediterranean biogeographic region	location/institutions	spain	location/institutions	undirected	10.1007/s10531-010-9835-8	ecological
134	mediterranean biogeographic region	location/institutions	stand	management	undirected	10.1007/s10531-010-9835-8	ecological
134	spain	location/institutions	adaptive management	management	undirected	10.1007/s10531-010-9835-8	ecological
134	spain	location/institutions	asexual regeneration	methods	undirected	10.1007/s10531-010-9835-8	ecological
134	spain	location/institutions	cattle	ecosystems/species	undirected	10.1007/s10531-010-9835-8	ecological
134	spain	location/institutions	coppice forest	ecosystems/species	undirected	10.1007/s10531-010-9835-8	ecological
134	spain	location/institutions	gis	methods	undirected	10.1007/s10531-010-9835-8	ecological
134	spain	location/institutions	oak	ecosystems/species	undirected	10.1007/s10531-010-9835-8	ecological
134	spain	location/institutions	quercus pyrenaica	ecosystems/species	undirected	10.1007/s10531-010-9835-8	ecological
134	spain	location/institutions	stand	management	undirected	10.1007/s10531-010-9835-8	ecological
135	greece	location/institutions	conservation planning	methods	undirected	10.1111/j.1466-822X.2004.00086.x	ecological
135	greece	location/institutions	conservation value	methods	undirected	10.1111/j.1466-822X.2004.00086.x	ecological
135	greece	location/institutions	endemicity	methods	undirected	10.1111/j.1466-822X.2004.00086.x	ecological
135	greece	location/institutions	hotspots	methods	undirected	10.1111/j.1466-822X.2004.00086.x	ecological
135	greece	location/institutions	rarity	methods	undirected	10.1111/j.1466-822X.2004.00086.x	ecological
135	greece	location/institutions	reserve design	methods	undirected	10.1111/j.1466-822X.2004.00086.x	ecological
139	sabor dam	location/institutions	biodiversity	management	undirected	10.1016/j.gloenvcha.2011.07.001	social and policies
139	sabor dam	location/institutions	climate change	methods	undirected	10.1016/j.gloenvcha.2011.07.001	social and policies
139	sabor dam	location/institutions	environmental conflicts	methods	undirected	10.1016/j.gloenvcha.2011.07.001	social and policies
139	sabor dam	location/institutions	law	management	undirected	10.1016/j.gloenvcha.2011.07.001	social and policies
139	sabor dam	location/institutions	renewable energy	methods	undirected	10.1016/j.gloenvcha.2011.07.001	social and policies
139	sabor dam	location/institutions	severn barrage	location/institutions	undirected	10.1016/j.gloenvcha.2011.07.001	social and policies
139	severn barrage	location/institutions	biodiversity	management	undirected	10.1016/j.gloenvcha.2011.07.001	social and policies
139	severn barrage	location/institutions	climate change	methods	undirected	10.1016/j.gloenvcha.2011.07.001	social and policies
139	severn barrage	location/institutions	environmental conflicts	methods	undirected	10.1016/j.gloenvcha.2011.07.001	social and policies
139	severn barrage	location/institutions	law	management	undirected	10.1016/j.gloenvcha.2011.07.001	social and policies
139	severn barrage	location/institutions	renewable energy	methods	undirected	10.1016/j.gloenvcha.2011.07.001	social and policies
142	ore mountains	location/institutions	climate change	methods	undirected	10.1016/j.ecolind.2012.05.016	social and policies
142	ore mountains	location/institutions	flood prevention	management	undirected	10.1016/j.ecolind.2012.05.016	social and policies
142	ore mountains	location/institutions	habitats	ecosystems/species	undirected	10.1016/j.ecolind.2012.05.016	social and policies
142	ore mountains	location/institutions	indicator species	methods	undirected	10.1016/j.ecolind.2012.05.016	social and policies
142	ore mountains	location/institutions	management costs	methods	undirected	10.1016/j.ecolind.2012.05.016	social and policies
142	ore mountains	location/institutions	nature conservation	management	undirected	10.1016/j.ecolind.2012.05.016	social and policies
142	ore mountains	location/institutions	wind farms	management	undirected	10.1016/j.ecolind.2012.05.016	social and policies
144	NGO	location/institutions	advocacy coalition	management	undirected	10.1017/S0376892912000380	social and policies
144	NGO	location/institutions	biodiversity	management	undirected	10.1017/S0376892912000380	social and policies
144	NGO	location/institutions	multi-level governance	methods	undirected	10.1017/S0376892912000380	social and policies
144	NGO	location/institutions	natura 2000	management	undirected	10.1017/S0376892912000380	social and policies
144	NGO	location/institutions	policy networks	methods	undirected	10.1017/S0376892912000380	social and policies
145	semi-arid mediterranean region	location/institutions	biodiversity conservation	management	undirected	10.1002/aqc.633	ecological
145	semi-arid mediterranean region	location/institutions	complementarity	methods	undirected	10.1002/aqc.633	ecological
145	semi-arid mediterranean region	location/institutions	protected areas	management	undirected	10.1002/aqc.633	ecological
145	semi-arid mediterranean region	location/institutions	water beetles	ecosystems/species	undirected	10.1002/aqc.633	ecological
149	eu	location/institutions	biodiversity conservation	management	undirected	10.1016/j.landurbplan.2011.03.004	ecological
149	eu	location/institutions	distribution range	methods	undirected	10.1016/j.landurbplan.2011.03.004	ecological
149	eu	location/institutions	eco-regional planning	methods	undirected	10.1016/j.landurbplan.2011.03.004	ecological
149	eu	location/institutions	habitat modelling	methods	undirected	10.1016/j.landurbplan.2011.03.004	ecological
149	eu	location/institutions	high conservation value forest	management	undirected	10.1016/j.landurbplan.2011.03.004	ecological
150	islands	location/institutions	conservation assessment	methods	undirected	10.1016/j.jnc.2011.04.001	ecological
150	islands	location/institutions	conservation mapping	methods	undirected	10.1016/j.jnc.2011.04.001	ecological
150	islands	location/institutions	habitats diversity	methods	undirected	10.1016/j.jnc.2011.04.001	ecological
150	islands	location/institutions	multicriteria analysis	methods	undirected	10.1016/j.jnc.2011.04.001	ecological
153	balearic islands	location/institutions	habitats directive	management	undirected	10.1016/0006-3207(95)00107-7	ecological
153	balearic islands	location/institutions	iberian	location/institutions	undirected	10.1016/0006-3207(95)00107-7	ecological
153	balearic islands	location/institutions	plant conservation	methods	undirected	10.1016/0006-3207(95)00107-7	ecological
153	balearic islands	location/institutions	threatened flora	ecosystems/species	undirected	10.1016/0006-3207(95)00107-7	ecological
153	iberian	location/institutions	habitats directive	management	undirected	10.1016/0006-3207(95)00107-7	ecological
153	iberian	location/institutions	plant conservation	methods	undirected	10.1016/0006-3207(95)00107-7	ecological
153	iberian	location/institutions	threatened flora	ecosystems/species	undirected	10.1016/0006-3207(95)00107-7	ecological
155	adriatic sea	location/institutions	biodiversity indicators	methods	undirected	10.1080/02757541003693193	ecological
155	adriatic sea	location/institutions	environmental quality	methods	undirected	10.1080/02757541003693193	ecological
155	adriatic sea	location/institutions	heterogeneity	methods	undirected	10.1080/02757541003693193	ecological
155	adriatic sea	location/institutions	management	management	undirected	10.1080/02757541003693193	ecological
155	adriatic sea	location/institutions	transitional waters	location/institutions	undirected	10.1080/02757541003693193	ecological
155	adriatic sea	location/institutions	trophic status	methods	undirected	10.1080/02757541003693193	ecological
155	adriatic sea	location/institutions	wfd	management	undirected	10.1080/02757541003693193	ecological
155	transitional waters	location/institutions	biodiversity indicators	methods	undirected	10.1080/02757541003693193	ecological
155	transitional waters	location/institutions	environmental quality	methods	undirected	10.1080/02757541003693193	ecological
155	transitional waters	location/institutions	heterogeneity	methods	undirected	10.1080/02757541003693193	ecological
155	transitional waters	location/institutions	management	management	undirected	10.1080/02757541003693193	ecological
155	transitional waters	location/institutions	trophic status	methods	undirected	10.1080/02757541003693193	ecological
155	transitional waters	location/institutions	wfd	management	undirected	10.1080/02757541003693193	ecological
161	eu	location/institutions	conservation	management	undirected	10.1016/j.biocon.2004.12.001	ecological
161	eu	location/institutions	cost-effectiveness	methods	undirected	10.1016/j.biocon.2004.12.001	ecological
161	eu	location/institutions	policy instruments	methods	undirected	10.1016/j.biocon.2004.12.001	ecological
166	calcareous soil	location/institutions	acidification	methods	undirected	WOS:000268571000009	ecological
166	calcareous soil	location/institutions	nutrient availability	methods	undirected	WOS:000268571000009	ecological
166	calcareous soil	location/institutions	plant diversity	methods	undirected	WOS:000268571000009	ecological
166	calcareous soil	location/institutions	sand steppe	ecosystems/species	undirected	WOS:000268571000009	ecological
166	calcareous soil	location/institutions	sandy grasslands	ecosystems/species	undirected	WOS:000268571000009	ecological
166	calcareous soil	location/institutions	threatened flora	ecosystems/species	undirected	WOS:000268571000009	ecological
170	sicily	location/institutions	adaptive management	management	undirected	10.1007/s10531-013-0473-9	ecological
170	sicily	location/institutions	biogeography	methods	undirected	10.1007/s10531-013-0473-9	ecological
170	sicily	location/institutions	classification	methods	undirected	10.1007/s10531-013-0473-9	ecological
170	sicily	location/institutions	endemic plants	ecosystems/species	undirected	10.1007/s10531-013-0473-9	ecological
170	sicily	location/institutions	iucn red list	management	undirected	10.1007/s10531-013-0473-9	ecological
170	sicily	location/institutions	natura 2000	management	undirected	10.1007/s10531-013-0473-9	ecological
171	spain	location/institutions	conservation	management	undirected	WOS:000225944400025	ecological
171	spain	location/institutions	distribution	methods	undirected	WOS:000225944400025	ecological
171	spain	location/institutions	emydidae	ecosystems/species	undirected	WOS:000225944400025	ecological
171	spain	location/institutions	emys orbicularis	ecosystems/species	undirected	WOS:000225944400025	ecological
171	spain	location/institutions	valencia	location/institutions	undirected	WOS:000225944400025	ecological
171	valencia	location/institutions	conservation	management	undirected	WOS:000225944400025	ecological
171	valencia	location/institutions	distribution	methods	undirected	WOS:000225944400025	ecological
171	valencia	location/institutions	emydidae	ecosystems/species	undirected	WOS:000225944400025	ecological
171	valencia	location/institutions	emys orbicularis	ecosystems/species	undirected	WOS:000225944400025	ecological
176	belgium	location/institutions	auc	methods	undirected	10.1016/j.biocon.2008.03.018	ecological
176	belgium	location/institutions	kappa statistics	methods	undirected	10.1016/j.biocon.2008.03.018	ecological
176	belgium	location/institutions	model comparison	methods	undirected	10.1016/j.biocon.2008.03.018	ecological
176	belgium	location/institutions	natura 2000	management	undirected	10.1016/j.biocon.2008.03.018	ecological
176	belgium	location/institutions	predictive modelling	methods	undirected	10.1016/j.biocon.2008.03.018	ecological
176	belgium	location/institutions	protected area effectiveness	methods	undirected	10.1016/j.biocon.2008.03.018	ecological
176	belgium	location/institutions	saproxylic beetles	ecosystems/species	undirected	10.1016/j.biocon.2008.03.018	ecological
178	lorraine	location/institutions	directives	management	undirected	10.1016/s0167-8809(01)00235-3	social and policies
178	lorraine	location/institutions	european policy	management	undirected	10.1016/s0167-8809(01)00235-3	social and policies
178	lorraine	location/institutions	fcs	methods	undirected	10.1016/s0167-8809(01)00235-3	social and policies
178	lorraine	location/institutions	habitats and birds	ecosystems/species	undirected	10.1016/s0167-8809(01)00235-3	social and policies
179	brackish-water	location/institutions	aquatic insect	ecosystems/species	undirected	10.1002/aqc.883	ecological
179	brackish-water	location/institutions	coastal wetlands	ecosystems/species	undirected	10.1002/aqc.883	ecological
179	brackish-water	location/institutions	lagoon conservation	management	undirected	10.1002/aqc.883	ecological
179	brackish-water	location/institutions	quatic coleoptera	ecosystems/species	undirected	10.1002/aqc.883	ecological
181	sardinia	location/institutions	biodiversity conservation	management	undirected	10.1080/11263504.2013.778911	ecological
181	sardinia	location/institutions	habitats directive	management	undirected	10.1080/11263504.2013.778911	ecological
181	sardinia	location/institutions	mediterranean grassland	ecosystems/species	undirected	10.1080/11263504.2013.778911	ecological
181	sardinia	location/institutions	phytosociology	methods	undirected	10.1080/11263504.2013.778911	ecological
183	spain	location/institutions	agri-environment policy	management	undirected	WOS:000232856900004	social and policies
183	spain	location/institutions	conservation	management	undirected	WOS:000232856900004	social and policies
183	spain	location/institutions	ex-ante assessment	methods	undirected	WOS:000232856900004	social and policies
183	spain	location/institutions	pseudo-steppe birds	ecosystems/species	undirected	WOS:000232856900004	social and policies
185	lakes	location/institutions	conservation	management	undirected	10.1007/s10750-006-0165-5	ecological
185	lakes	location/institutions	fitness	methods	undirected	10.1007/s10750-006-0165-5	ecological
185	lakes	location/institutions	macrophytes	ecosystems/species	undirected	10.1007/s10750-006-0165-5	ecological
185	lakes	location/institutions	najas flexilis	ecosystems/species	undirected	10.1007/s10750-006-0165-5	ecological
185	lakes	location/institutions	plant functional type	methods	undirected	10.1007/s10750-006-0165-5	ecological
186	iberian	location/institutions	graellsia isabelae	ecosystems/species	undirected	10.2193/2006-312	ecological
186	iberian	location/institutions	nonequilibrium	methods	undirected	10.2193/2006-312	ecological
186	iberian	location/institutions	pseudo-absences	methods	undirected	10.2193/2006-312	ecological
186	iberian	location/institutions	sdm	methods	undirected	10.2193/2006-312	ecological
186	iberian	location/institutions	threatened species	ecosystems/species	undirected	10.2193/2006-312	ecological
188	lakes	location/institutions	birds	ecosystems/species	undirected	10.1002/aqc.2303	ecological
188	lakes	location/institutions	distribution	methods	undirected	10.1002/aqc.2303	ecological
188	lakes	location/institutions	ramsar site	management	undirected	10.1002/aqc.2303	ecological
188	lakes	location/institutions	spa	management	undirected	10.1002/aqc.2303	ecological
193	burry inlet	location/institutions	conservation management	management	undirected	10.1016/j.biocon.2010.07.004	ecological
193	burry inlet	location/institutions	indicators	methods	undirected	10.1016/j.biocon.2010.07.004	ecological
193	burry inlet	location/institutions	individual-based model	methods	undirected	10.1016/j.biocon.2010.07.004	ecological
193	burry inlet	location/institutions	knot calidris canutus	ecosystems/species	undirected	10.1016/j.biocon.2010.07.004	ecological
193	burry inlet	location/institutions	monitoring	methods	undirected	10.1016/j.biocon.2010.07.004	ecological
193	burry inlet	location/institutions	mpa	management	undirected	10.1016/j.biocon.2010.07.004	ecological
193	burry inlet	location/institutions	oystercatcher haematopus ostralegus	ecosystems/species	undirected	10.1016/j.biocon.2010.07.004	ecological
193	burry inlet	location/institutions	shellfishing	management	undirected	10.1016/j.biocon.2010.07.004	ecological
193	burry inlet	location/institutions	shorebirds	ecosystems/species	undirected	10.1016/j.biocon.2010.07.004	ecological
193	burry inlet	location/institutions	spa	management	undirected	10.1016/j.biocon.2010.07.004	ecological
194	iberian	location/institutions	assessment	methods	undirected	10.1016/j.rse.2010.03.009	ecological
194	iberian	location/institutions	desertification	management	undirected	10.1016/j.rse.2010.03.009	ecological
194	iberian	location/institutions	land cover classification	methods	undirected	10.1016/j.rse.2010.03.009	ecological
194	iberian	location/institutions	land degradation	management	undirected	10.1016/j.rse.2010.03.009	ecological
194	iberian	location/institutions	medokads	location/institutions	undirected	10.1016/j.rse.2010.03.009	ecological
194	iberian	location/institutions	noaa-avhrr	methods	undirected	10.1016/j.rse.2010.03.009	ecological
194	iberian	location/institutions	rain use efficiency	methods	undirected	10.1016/j.rse.2010.03.009	ecological
194	iberian	location/institutions	time series	methods	undirected	10.1016/j.rse.2010.03.009	ecological
194	medokads	location/institutions	assessment	methods	undirected	10.1016/j.rse.2010.03.009	ecological
194	medokads	location/institutions	desertification	management	undirected	10.1016/j.rse.2010.03.009	ecological
194	medokads	location/institutions	land cover classification	methods	undirected	10.1016/j.rse.2010.03.009	ecological
194	medokads	location/institutions	land degradation	management	undirected	10.1016/j.rse.2010.03.009	ecological
194	medokads	location/institutions	noaa-avhrr	methods	undirected	10.1016/j.rse.2010.03.009	ecological
194	medokads	location/institutions	rain use efficiency	methods	undirected	10.1016/j.rse.2010.03.009	ecological
194	medokads	location/institutions	time series	methods	undirected	10.1016/j.rse.2010.03.009	ecological
195	lakes	location/institutions	echo sounding	methods	undirected	10.1016/j.fishres.2008.09.013	ecological
195	lakes	location/institutions	gill netting	management	undirected	10.1016/j.fishres.2008.09.013	ecological
195	lakes	location/institutions	reservoir	location/institutions	undirected	10.1016/j.fishres.2008.09.013	ecological
195	lakes	location/institutions	site condition monitoring	methods	undirected	10.1016/j.fishres.2008.09.013	ecological
195	reservoir	location/institutions	echo sounding	methods	undirected	10.1016/j.fishres.2008.09.013	ecological
195	reservoir	location/institutions	gill netting	management	undirected	10.1016/j.fishres.2008.09.013	ecological
195	reservoir	location/institutions	site condition monitoring	methods	undirected	10.1016/j.fishres.2008.09.013	ecological
196	peat	location/institutions	earth observation	methods	undirected	10.1016/j.jnc.2012.02.001	ecological
196	peat	location/institutions	grassland management	management	undirected	10.1016/j.jnc.2012.02.001	ecological
196	peat	location/institutions	habitat mapping	methods	undirected	10.1016/j.jnc.2012.02.001	ecological
196	peat	location/institutions	monitoring	methods	undirected	10.1016/j.jnc.2012.02.001	ecological
196	peat	location/institutions	natura 2000	management	undirected	10.1016/j.jnc.2012.02.001	ecological
196	peat	location/institutions	rapideye	methods	undirected	10.1016/j.jnc.2012.02.001	ecological
199	finland	location/institutions	attitudes	methods	undirected	10.1017/s0376892904001201	social and policies
199	finland	location/institutions	locality	location/institutions	undirected	10.1017/s0376892904001201	social and policies
199	finland	location/institutions	natura 2000	management	undirected	10.1017/s0376892904001201	social and policies
199	finland	location/institutions	protected areas	management	undirected	10.1017/s0376892904001201	social and policies
199	finland	location/institutions	qualitative research	methods	undirected	10.1017/s0376892904001201	social and policies
199	locality	location/institutions	attitudes	methods	undirected	10.1017/s0376892904001201	social and policies
199	locality	location/institutions	natura 2000	management	undirected	10.1017/s0376892904001201	social and policies
199	locality	location/institutions	protected areas	management	undirected	10.1017/s0376892904001201	social and policies
199	locality	location/institutions	qualitative research	methods	undirected	10.1017/s0376892904001201	social and policies
201	spain	location/institutions	agri-environment policy	management	undirected	10.1016/j.jenvman.2010.03.018	ecological
201	spain	location/institutions	cereal crops	ecosystems/species	undirected	10.1016/j.jenvman.2010.03.018	ecological
201	spain	location/institutions	delphi analysis	methods	undirected	10.1016/j.jenvman.2010.03.018	ecological
201	spain	location/institutions	fallow land	ecosystems/species	undirected	10.1016/j.jenvman.2010.03.018	ecological
201	spain	location/institutions	over-implementation	methods	undirected	10.1016/j.jenvman.2010.03.018	ecological
201	spain	location/institutions	set-aside	methods	undirected	10.1016/j.jenvman.2010.03.018	ecological
201	spain	location/institutions	spa	management	undirected	10.1016/j.jenvman.2010.03.018	ecological
201	spain	location/institutions	steppe birds	ecosystems/species	undirected	10.1016/j.jenvman.2010.03.018	ecological
204	maerl	location/institutions	benthos	ecosystems/species	undirected	10.1007/s10531-011-0210-1	ecological
204	maerl	location/institutions	biodiversity	management	undirected	10.1007/s10531-011-0210-1	ecological
204	maerl	location/institutions	conservation	management	undirected	10.1007/s10531-011-0210-1	ecological
204	maerl	location/institutions	functional diversity	methods	undirected	10.1007/s10531-011-0210-1	ecological
204	maerl	location/institutions	habitats	ecosystems/species	undirected	10.1007/s10531-011-0210-1	ecological
204	maerl	location/institutions	management	management	undirected	10.1007/s10531-011-0210-1	ecological
204	maerl	location/institutions	mediterranean	location/institutions	undirected	10.1007/s10531-011-0210-1	ecological
204	maerl	location/institutions	seabed	location/institutions	undirected	10.1007/s10531-011-0210-1	ecological
204	mediterranean	location/institutions	benthos	ecosystems/species	undirected	10.1007/s10531-011-0210-1	ecological
204	mediterranean	location/institutions	biodiversity	management	undirected	10.1007/s10531-011-0210-1	ecological
204	mediterranean	location/institutions	conservation	management	undirected	10.1007/s10531-011-0210-1	ecological
204	mediterranean	location/institutions	functional diversity	methods	undirected	10.1007/s10531-011-0210-1	ecological
204	mediterranean	location/institutions	habitats	ecosystems/species	undirected	10.1007/s10531-011-0210-1	ecological
204	mediterranean	location/institutions	management	management	undirected	10.1007/s10531-011-0210-1	ecological
204	mediterranean	location/institutions	seabed	location/institutions	undirected	10.1007/s10531-011-0210-1	ecological
204	seabed	location/institutions	benthos	ecosystems/species	undirected	10.1007/s10531-011-0210-1	ecological
204	seabed	location/institutions	biodiversity	management	undirected	10.1007/s10531-011-0210-1	ecological
204	seabed	location/institutions	conservation	management	undirected	10.1007/s10531-011-0210-1	ecological
204	seabed	location/institutions	functional diversity	methods	undirected	10.1007/s10531-011-0210-1	ecological
204	seabed	location/institutions	habitats	ecosystems/species	undirected	10.1007/s10531-011-0210-1	ecological
204	seabed	location/institutions	management	management	undirected	10.1007/s10531-011-0210-1	ecological
207	bioregions	location/institutions	environmental modeling	methods	undirected	10.1016/j.ecolind.2011.04.012	ecological
207	bioregions	location/institutions	indicator species	methods	undirected	10.1016/j.ecolind.2011.04.012	ecological
207	bioregions	location/institutions	plants	ecosystems/species	undirected	10.1016/j.ecolind.2011.04.012	ecological
207	bioregions	location/institutions	temporary wetlands	ecosystems/species	undirected	10.1016/j.ecolind.2011.04.012	ecological
208	mediterranean	location/institutions	breeding bird species	ecosystems/species	undirected	WOS:000303663000014	ecological
208	mediterranean	location/institutions	conservation	management	undirected	WOS:000303663000014	ecological
208	mediterranean	location/institutions	variation partitioning	methods	undirected	WOS:000303663000014	ecological
208	mediterranean	location/institutions	wider countryside	methods	undirected	WOS:000303663000014	ecological
209	portugal	location/institutions	kriging	methods	undirected	WOS:000229006400008	ecological
209	portugal	location/institutions	little bustard	ecosystems/species	undirected	WOS:000229006400008	ecological
209	portugal	location/institutions	macro-habitat modelling	methods	undirected	WOS:000229006400008	ecological
209	portugal	location/institutions	tetrax tetrax	ecosystems/species	undirected	WOS:000229006400008	ecological
210	ireland	location/institutions	conflicts	management	undirected	10.1080/15239080801928428	social and policies
210	ireland	location/institutions	conservation policy	management	undirected	10.1080/15239080801928428	social and policies
210	ireland	location/institutions	habitats	ecosystems/species	undirected	10.1080/15239080801928428	social and policies
210	ireland	location/institutions	politicization	management	undirected	10.1080/15239080801928428	social and policies
211	corsica	location/institutions	bryophytes	ecosystems/species	undirected	10.1080/11263500903220190	ecological
211	corsica	location/institutions	ecology	methods	undirected	10.1080/11263500903220190	ecological
211	corsica	location/institutions	mediterranean	location/institutions	undirected	10.1080/11263500903220190	ecological
211	corsica	location/institutions	sardinia	location/institutions	undirected	10.1080/11263500903220190	ecological
211	corsica	location/institutions	temporary ponds	ecosystems/species	undirected	10.1080/11263500903220190	ecological
211	mediterranean	location/institutions	bryophytes	ecosystems/species	undirected	10.1080/11263500903220190	ecological
211	mediterranean	location/institutions	ecology	methods	undirected	10.1080/11263500903220190	ecological
211	mediterranean	location/institutions	sardinia	location/institutions	undirected	10.1080/11263500903220190	ecological
211	mediterranean	location/institutions	temporary ponds	ecosystems/species	undirected	10.1080/11263500903220190	ecological
211	sardinia	location/institutions	bryophytes	ecosystems/species	undirected	10.1080/11263500903220190	ecological
211	sardinia	location/institutions	ecology	methods	undirected	10.1080/11263500903220190	ecological
211	sardinia	location/institutions	temporary ponds	ecosystems/species	undirected	10.1080/11263500903220190	ecological
213	eu	location/institutions	butterflies	ecosystems/species	undirected	10.1007/s10841-008-9148-3	ecological
213	eu	location/institutions	endemicity	methods	undirected	10.1007/s10841-008-9148-3	ecological
213	eu	location/institutions	rarity	methods	undirected	10.1007/s10841-008-9148-3	ecological
213	eu	location/institutions	refugia	methods	undirected	10.1007/s10841-008-9148-3	ecological
213	eu	location/institutions	species richness	methods	undirected	10.1007/s10841-008-9148-3	ecological
215	eu	location/institutions	climate change	methods	undirected	10.1111/j.1752-4598.2012.00194.x	ecological
215	eu	location/institutions	distribution range	methods	undirected	10.1111/j.1752-4598.2012.00194.x	ecological
215	eu	location/institutions	habitats directive	management	undirected	10.1111/j.1752-4598.2012.00194.x	ecological
215	eu	location/institutions	insect conservation	management	undirected	10.1111/j.1752-4598.2012.00194.x	ecological
215	eu	location/institutions	range shift	methods	undirected	10.1111/j.1752-4598.2012.00194.x	ecological
215	eu	location/institutions	sdm	methods	undirected	10.1111/j.1752-4598.2012.00194.x	ecological
215	eu	location/institutions	species-specific dispersal ability	methods	undirected	10.1111/j.1752-4598.2012.00194.x	ecological
216	greece	location/institutions	biogeography conservation	methods	undirected	10.1111/j.1365-2664.2010.01814.x	ecological
216	greece	location/institutions	commonness and rarity	methods	undirected	10.1111/j.1365-2664.2010.01814.x	ecological
216	greece	location/institutions	higher taxonomic levels	methods	undirected	10.1111/j.1365-2664.2010.01814.x	ecological
216	greece	location/institutions	natura 2000	management	undirected	10.1111/j.1365-2664.2010.01814.x	ecological
216	greece	location/institutions	rapid biodiversity assessments	methods	undirected	10.1111/j.1365-2664.2010.01814.x	ecological
216	greece	location/institutions	surrogate methods	methods	undirected	10.1111/j.1365-2664.2010.01814.x	ecological
218	cee	location/institutions	bern convention	management	undirected	10.1023/a:1008828704456	ecological
218	cee	location/institutions	conservation priorities	methods	undirected	10.1023/a:1008828704456	ecological
218	cee	location/institutions	directives	management	undirected	10.1023/a:1008828704456	ecological
218	cee	location/institutions	habitats	ecosystems/species	undirected	10.1023/a:1008828704456	ecological
218	cee	location/institutions	iucn red list	management	undirected	10.1023/a:1008828704456	ecological
218	cee	location/institutions	plants	ecosystems/species	undirected	10.1023/a:1008828704456	ecological
218	cee	location/institutions	responsibility	management	undirected	10.1023/a:1008828704456	ecological
219	harbour	location/institutions	bottlenose dolphin	ecosystems/species	undirected	10.1016/j.biocon.2013.04.010	ecological
219	harbour	location/institutions	bycatch	methods	undirected	10.1016/j.biocon.2013.04.010	ecological
219	harbour	location/institutions	common dolphin	ecosystems/species	undirected	10.1016/j.biocon.2013.04.010	ecological
219	harbour	location/institutions	conservation status	methods	undirected	10.1016/j.biocon.2013.04.010	ecological
219	harbour	location/institutions	habitats directive	management	undirected	10.1016/j.biocon.2013.04.010	ecological
219	harbour	location/institutions	line transect sampling	methods	undirected	10.1016/j.biocon.2013.04.010	ecological
219	harbour	location/institutions	minke whale	ecosystems/species	undirected	10.1016/j.biocon.2013.04.010	ecological
219	harbour	location/institutions	north sea	location/institutions	undirected	10.1016/j.biocon.2013.04.010	ecological
219	harbour	location/institutions	porpoise	methods	undirected	10.1016/j.biocon.2013.04.010	ecological
219	harbour	location/institutions	scans	methods	undirected	10.1016/j.biocon.2013.04.010	ecological
219	harbour	location/institutions	white-beaked dolphin	ecosystems/species	undirected	10.1016/j.biocon.2013.04.010	ecological
219	north sea	location/institutions	bottlenose dolphin	ecosystems/species	undirected	10.1016/j.biocon.2013.04.010	ecological
219	north sea	location/institutions	bycatch	methods	undirected	10.1016/j.biocon.2013.04.010	ecological
219	north sea	location/institutions	common dolphin	ecosystems/species	undirected	10.1016/j.biocon.2013.04.010	ecological
219	north sea	location/institutions	conservation status	methods	undirected	10.1016/j.biocon.2013.04.010	ecological
219	north sea	location/institutions	habitats directive	management	undirected	10.1016/j.biocon.2013.04.010	ecological
219	north sea	location/institutions	line transect sampling	methods	undirected	10.1016/j.biocon.2013.04.010	ecological
219	north sea	location/institutions	minke whale	ecosystems/species	undirected	10.1016/j.biocon.2013.04.010	ecological
219	north sea	location/institutions	porpoise	methods	undirected	10.1016/j.biocon.2013.04.010	ecological
219	north sea	location/institutions	scans	methods	undirected	10.1016/j.biocon.2013.04.010	ecological
219	north sea	location/institutions	white-beaked dolphin	ecosystems/species	undirected	10.1016/j.biocon.2013.04.010	ecological
220	mediterranean sea	location/institutions	cetaceans	ecosystems/species	undirected	10.1016/s0967-0637(02)00123-1	ecological
220	mediterranean sea	location/institutions	conservation	management	undirected	10.1016/s0967-0637(02)00123-1	ecological
220	mediterranean sea	location/institutions	distribution	methods	undirected	10.1016/s0967-0637(02)00123-1	ecological
220	mediterranean sea	location/institutions	dolphins	ecosystems/species	undirected	10.1016/s0967-0637(02)00123-1	ecological
220	mediterranean sea	location/institutions	environmental factors	methods	undirected	10.1016/s0967-0637(02)00123-1	ecological
220	mediterranean sea	location/institutions	habitats	ecosystems/species	undirected	10.1016/s0967-0637(02)00123-1	ecological
220	mediterranean sea	location/institutions	physiography	methods	undirected	10.1016/s0967-0637(02)00123-1	ecological
220	mediterranean sea	location/institutions	protected areas	management	undirected	10.1016/s0967-0637(02)00123-1	ecological
222	vistula river	location/institutions	changes in riverine vegetation	methods	undirected	WOS:000301696500002	ecological
222	vistula river	location/institutions	historical analysis	methods	undirected	WOS:000301696500002	ecological
222	vistula river	location/institutions	natura 2000	management	undirected	WOS:000301696500002	ecological
222	vistula river	location/institutions	vegetation mapping	methods	undirected	WOS:000301696500002	ecological
225	austria	location/institutions	climate change	methods	undirected	10.1016/j.biocon.2009.10.024	ecological
225	austria	location/institutions	invasion risk	methods	undirected	10.1016/j.biocon.2009.10.024	ecological
225	austria	location/institutions	natura 2000	management	undirected	10.1016/j.biocon.2009.10.024	ecological
225	austria	location/institutions	reserve networks	management	undirected	10.1016/j.biocon.2009.10.024	ecological
225	austria	location/institutions	sdm	methods	undirected	10.1016/j.biocon.2009.10.024	ecological
225	austria	location/institutions	threatened habitats	ecosystems/species	undirected	10.1016/j.biocon.2009.10.024	ecological
226	brackish-water	location/institutions	biodiversity action planning	management	undirected	10.1016/j.tnarpol.2007.03.004	ecological
226	brackish-water	location/institutions	fcs	methods	undirected	10.1016/j.tnarpol.2007.03.004	ecological
226	brackish-water	location/institutions	habitat restoration	management	undirected	10.1016/j.tnarpol.2007.03.004	ecological
226	brackish-water	location/institutions	habitats directive	management	undirected	10.1016/j.tnarpol.2007.03.004	ecological
228	netherlands	location/institutions	cyclic floodplain rejuvenation	management	undirected	10.1016/j.jenvman.2013.06.023	social and policies
228	netherlands	location/institutions	floodplain management	management	undirected	10.1016/j.jenvman.2013.06.023	social and policies
228	netherlands	location/institutions	natura 2000	management	undirected	10.1016/j.jenvman.2013.06.023	social and policies
228	netherlands	location/institutions	river management	management	undirected	10.1016/j.jenvman.2013.06.023	social and policies
228	netherlands	location/institutions	visions of nature	methods	undirected	10.1016/j.jenvman.2013.06.023	social and policies
229	appenines	location/institutions	abies alba	ecosystems/species	undirected	10.1080/11263504.2011.623190	ecological
229	appenines	location/institutions	dead wood	ecosystems/species	undirected	10.1080/11263504.2011.623190	ecological
229	appenines	location/institutions	dinaric mountains	location/institutions	undirected	10.1080/11263504.2011.623190	ecological
229	appenines	location/institutions	forest habitats	ecosystems/species	undirected	10.1080/11263504.2011.623190	ecological
229	appenines	location/institutions	natura 2000	management	undirected	10.1080/11263504.2011.623190	ecological
229	appenines	location/institutions	silver fir habitats	ecosystems/species	undirected	10.1080/11263504.2011.623190	ecological
229	dinaric mountains	location/institutions	abies alba	ecosystems/species	undirected	10.1080/11263504.2011.623190	ecological
229	dinaric mountains	location/institutions	dead wood	ecosystems/species	undirected	10.1080/11263504.2011.623190	ecological
229	dinaric mountains	location/institutions	forest habitats	ecosystems/species	undirected	10.1080/11263504.2011.623190	ecological
229	dinaric mountains	location/institutions	natura 2000	management	undirected	10.1080/11263504.2011.623190	ecological
229	dinaric mountains	location/institutions	silver fir habitats	ecosystems/species	undirected	10.1080/11263504.2011.623190	ecological
231	soil	location/institutions	agrarian land	ecosystems/species	undirected	WOS:000322439500001	ecological
231	soil	location/institutions	grasslands	ecosystems/species	undirected	WOS:000322439500001	ecological
231	soil	location/institutions	mobile humic acids	methods	undirected	WOS:000322439500001	ecological
231	soil	location/institutions	natura 2000	management	undirected	WOS:000322439500001	ecological
231	soil	location/institutions	soil organic matter	location/institutions	undirected	WOS:000322439500001	ecological
231	soil organic matter	location/institutions	agrarian land	ecosystems/species	undirected	WOS:000322439500001	ecological
231	soil organic matter	location/institutions	grasslands	ecosystems/species	undirected	WOS:000322439500001	ecological
231	soil organic matter	location/institutions	mobile humic acids	methods	undirected	WOS:000322439500001	ecological
231	soil organic matter	location/institutions	natura 2000	management	undirected	WOS:000322439500001	ecological
234	karst	location/institutions	diptera	ecosystems/species	undirected	10.1007/s10531-005-5045-1	ecological
234	karst	location/institutions	sciomyzidae	ecosystems/species	undirected	10.1007/s10531-005-5045-1	ecological
234	karst	location/institutions	turloughs	ecosystems/species	undirected	10.1007/s10531-005-5045-1	ecological
234	karst	location/institutions	vegetation zone	ecosystems/species	undirected	10.1007/s10531-005-5045-1	ecological
235	karst	location/institutions	carabidae	ecosystems/species	undirected	WOS:000174722400008	ecological
235	karst	location/institutions	farm management	management	undirected	WOS:000174722400008	ecological
235	karst	location/institutions	turloughs	ecosystems/species	undirected	WOS:000174722400008	ecological
235	karst	location/institutions	vegetation	ecosystems/species	undirected	WOS:000174722400008	ecological
240	gargano	location/institutions	habitats directive	management	undirected	10.1080/11263504.2013.860052	ecological
240	gargano	location/institutions	management purposes	management	undirected	10.1080/11263504.2013.860052	ecological
240	gargano	location/institutions	natura 2000	management	undirected	10.1080/11263504.2013.860052	ecological
240	gargano	location/institutions	phytoclimatology	methods	undirected	10.1080/11263504.2013.860052	ecological
240	gargano	location/institutions	plant communities	ecosystems/species	undirected	10.1080/11263504.2013.860052	ecological
240	gargano	location/institutions	threatened species	ecosystems/species	undirected	10.1080/11263504.2013.860052	ecological
240	gargano	location/institutions	threats	methods	undirected	10.1080/11263504.2013.860052	ecological
247	denmark	location/institutions	accuracy	methods	undirected	10.1111/avsc.12020	ecological
247	denmark	location/institutions	calcareous fens	ecosystems/species	undirected	10.1111/avsc.12020	ecological
247	denmark	location/institutions	habitats directive	management	undirected	10.1111/avsc.12020	ecological
247	denmark	location/institutions	indicator species	methods	undirected	10.1111/avsc.12020	ecological
247	denmark	location/institutions	indicator values	methods	undirected	10.1111/avsc.12020	ecological
247	denmark	location/institutions	nutrient ratio	methods	undirected	10.1111/avsc.12020	ecological
247	denmark	location/institutions	precision	methods	undirected	10.1111/avsc.12020	ecological
247	denmark	location/institutions	wetlands	ecosystems/species	undirected	10.1111/avsc.12020	ecological
249	romania	location/institutions	climate change	methods	undirected	WOS:000319956600008	ecological
249	romania	location/institutions	distribution	methods	undirected	WOS:000319956600008	ecological
249	romania	location/institutions	glacial relict	ecosystems/species	undirected	WOS:000319956600008	ecological
249	romania	location/institutions	maxent	methods	undirected	WOS:000319956600008	ecological
249	romania	location/institutions	natura 2000	management	undirected	WOS:000319956600008	ecological
249	romania	location/institutions	sdm	methods	undirected	WOS:000319956600008	ecological
251	life nature	location/institutions	damage prevention	management	undirected	10.4404/hystrix-23.1-4548	ecological
251	life nature	location/institutions	wolves damages	management	undirected	10.4404/hystrix-23.1-4548	ecological
254	portugal	location/institutions	butterflies	ecosystems/species	undirected	10.1007/s10841-009-9250-1	ecological
254	portugal	location/institutions	habitat fragmentation	methods	undirected	10.1007/s10841-009-9250-1	ecological
254	portugal	location/institutions	habitats directive	management	undirected	10.1007/s10841-009-9250-1	ecological
254	portugal	location/institutions	mark recapture	methods	undirected	10.1007/s10841-009-9250-1	ecological
254	portugal	location/institutions	movement behaviour	methods	undirected	10.1007/s10841-009-9250-1	ecological
259	greece	location/institutions	ecotourism	management	undirected	10.1007/s00267-012-9856-z	social and policies
259	greece	location/institutions	islands	location/institutions	undirected	10.1007/s00267-012-9856-z	social and policies
259	greece	location/institutions	pro-environmental intentions	management	undirected	10.1007/s00267-012-9856-z	social and policies
259	greece	location/institutions	protected areas	management	undirected	10.1007/s00267-012-9856-z	social and policies
259	greece	location/institutions	tourism development	management	undirected	10.1007/s00267-012-9856-z	social and policies
259	islands	location/institutions	ecotourism	management	undirected	10.1007/s00267-012-9856-z	social and policies
259	islands	location/institutions	pro-environmental intentions	management	undirected	10.1007/s00267-012-9856-z	social and policies
259	islands	location/institutions	protected areas	management	undirected	10.1007/s00267-012-9856-z	social and policies
259	islands	location/institutions	tourism development	management	undirected	10.1007/s00267-012-9856-z	social and policies
264	slovakia	location/institutions	austropotamobius torrentium	ecosystems/species	undirected	10.1051/kmae:2005014	ecological
264	slovakia	location/institutions	crayfish	ecosystems/species	undirected	10.1051/kmae:2005014	ecological
264	slovakia	location/institutions	distribution	methods	undirected	10.1051/kmae:2005014	ecological
267	irish sea	location/institutions	boosted regression trees	methods	undirected	10.1007/s12526-012-0139-y	ecological
267	irish sea	location/institutions	demersal fish	ecosystems/species	undirected	10.1007/s12526-012-0139-y	ecological
267	irish sea	location/institutions	megafauna	ecosystems/species	undirected	10.1007/s12526-012-0139-y	ecological
267	irish sea	location/institutions	st george's channel	location/institutions	undirected	10.1007/s12526-012-0139-y	ecological
267	irish sea	location/institutions	wind farms	management	undirected	10.1007/s12526-012-0139-y	ecological
267	st george's channel	location/institutions	boosted regression trees	methods	undirected	10.1007/s12526-012-0139-y	ecological
267	st george's channel	location/institutions	demersal fish	ecosystems/species	undirected	10.1007/s12526-012-0139-y	ecological
267	st george's channel	location/institutions	megafauna	ecosystems/species	undirected	10.1007/s12526-012-0139-y	ecological
267	st george's channel	location/institutions	wind farms	management	undirected	10.1007/s12526-012-0139-y	ecological
269	iberian	location/institutions	conservation effectiveness	methods	undirected	10.1111/ddi.12104	ecological
269	iberian	location/institutions	multidimensional envelope	methods	undirected	10.1111/ddi.12104	ecological
269	iberian	location/institutions	national parks	management	undirected	10.1111/ddi.12104	ecological
269	iberian	location/institutions	natura 2000	management	undirected	10.1111/ddi.12104	ecological
269	iberian	location/institutions	sdm	methods	undirected	10.1111/ddi.12104	ecological
270	life nature	location/institutions	benchmark	methods	undirected	10.5751/es-05847-180415	social and policies
270	life nature	location/institutions	ecological restoration	methods	undirected	10.5751/es-05847-180415	social and policies
270	life nature	location/institutions	human impact	management	undirected	10.5751/es-05847-180415	social and policies
270	life nature	location/institutions	natura 2000	management	undirected	10.5751/es-05847-180415	social and policies
270	life nature	location/institutions	nature policy	management	undirected	10.5751/es-05847-180415	social and policies
270	life nature	location/institutions	semicultural landscapes	management	undirected	10.5751/es-05847-180415	social and policies
270	life nature	location/institutions	ser attributes	methods	undirected	10.5751/es-05847-180415	social and policies
272	serpentines	location/institutions	dolomitophilous	methods	undirected	WOS:000285855600003	ecological
272	serpentines	location/institutions	flora	ecosystems/species	undirected	WOS:000285855600003	ecological
272	serpentines	location/institutions	gypsophile	ecosystems/species	undirected	WOS:000285855600003	ecological
272	serpentines	location/institutions	gypsum	ecosystems/species	undirected	WOS:000285855600003	ecological
272	serpentines	location/institutions	vegetation	ecosystems/species	undirected	WOS:000285855600003	ecological
273	crete	location/institutions	dpsir	methods	undirected	10.1051/limn:2008009	ecological
273	crete	location/institutions	management planning	methods	undirected	10.1051/limn:2008009	ecological
273	crete	location/institutions	mediterranean temporary ponds	ecosystems/species	undirected	10.1051/limn:2008009	ecological
273	crete	location/institutions	mtp	management	undirected	10.1051/limn:2008009	ecological
273	crete	location/institutions	protection	management	undirected	10.1051/limn:2008009	ecological
273	crete	location/institutions	restoration	management	undirected	10.1051/limn:2008009	ecological
275	hard water springs	location/institutions	algae	ecosystems/species	undirected	10.1007/s00035-009-0064-2	ecological
275	hard water springs	location/institutions	bryophytes	ecosystems/species	undirected	10.1007/s00035-009-0064-2	ecological
275	hard water springs	location/institutions	cratoneurion	ecosystems/species	undirected	10.1007/s00035-009-0064-2	ecological
275	hard water springs	location/institutions	cyanobacteria	ecosystems/species	undirected	10.1007/s00035-009-0064-2	ecological
275	hard water springs	location/institutions	stream plant ecology	methods	undirected	10.1007/s00035-009-0064-2	ecological
278	large river	location/institutions	ecological engineering	methods	undirected	10.1016/j.envsci.2012.08.011	ecological
278	large river	location/institutions	glm	methods	undirected	10.1016/j.envsci.2012.08.011	ecological
278	large river	location/institutions	habitat modelling	methods	undirected	10.1016/j.envsci.2012.08.011	ecological
278	large river	location/institutions	habitats directive	management	undirected	10.1016/j.envsci.2012.08.011	ecological
278	large river	location/institutions	wetlands	ecosystems/species	undirected	10.1016/j.envsci.2012.08.011	ecological
278	large river	location/institutions	wfd	management	undirected	10.1016/j.envsci.2012.08.011	ecological
280	poland	location/institutions	ecological indices	methods	undirected	WOS:000309251900013	ecological
280	poland	location/institutions	life cycle stages	methods	undirected	WOS:000309251900013	ecological
280	poland	location/institutions	pulsatilla patens	ecosystems/species	undirected	WOS:000309251900013	ecological
284	germany	location/institutions	barrier	management	undirected	10.2193/2007-574	ecological
284	germany	location/institutions	carnivores	ecosystems/species	undirected	10.2193/2007-574	ecological
284	germany	location/institutions	crossing structures	management	undirected	10.2193/2007-574	ecological
284	germany	location/institutions	felis silvestris	ecosystems/species	undirected	10.2193/2007-574	ecological
284	germany	location/institutions	fencing	management	undirected	10.2193/2007-574	ecological
284	germany	location/institutions	habitat fragmentation	methods	undirected	10.2193/2007-574	ecological
284	germany	location/institutions	habitats directive	management	undirected	10.2193/2007-574	ecological
284	germany	location/institutions	road mortality	methods	undirected	10.2193/2007-574	ecological
284	germany	location/institutions	temporal behavior	methods	undirected	10.2193/2007-574	ecological
286	mediterranean basin	location/institutions	biodiversity conservation	management	undirected	10.1007/s11258-008-9434-x	ecological
286	mediterranean basin	location/institutions	forest management	management	undirected	10.1007/s11258-008-9434-x	ecological
286	mediterranean basin	location/institutions	habitats directive	management	undirected	10.1007/s11258-008-9434-x	ecological
286	mediterranean basin	location/institutions	plant-animal interaction	methods	undirected	10.1007/s11258-008-9434-x	ecological
286	mediterranean basin	location/institutions	plant-plant interaction	methods	undirected	10.1007/s11258-008-9434-x	ecological
289	spain	location/institutions	agriculture intensification	management	undirected	10.1016/j.agee.2011.09.002	ecological
289	spain	location/institutions	butterflies	ecosystems/species	undirected	10.1016/j.agee.2011.09.002	ecological
289	spain	location/institutions	cereal steppes	ecosystems/species	undirected	10.1016/j.agee.2011.09.002	ecological
289	spain	location/institutions	irrigation	management	undirected	10.1016/j.agee.2011.09.002	ecological
289	spain	location/institutions	mediterranean landscape	ecosystems/species	undirected	10.1016/j.agee.2011.09.002	ecological
291	boats	location/institutions	anchoring	management	undirected	10.1007/s11273-008-9128-0	ecological
291	boats	location/institutions	erosion	methods	undirected	10.1007/s11273-008-9128-0	ecological
291	boats	location/institutions	habitats directive	management	undirected	10.1007/s11273-008-9128-0	ecological
291	boats	location/institutions	lakes	location/institutions	undirected	10.1007/s11273-008-9128-0	ecological
291	boats	location/institutions	littoral	location/institutions	undirected	10.1007/s11273-008-9128-0	ecological
291	boats	location/institutions	mechanical damage	management	undirected	10.1007/s11273-008-9128-0	ecological
291	boats	location/institutions	natura 2000	management	undirected	10.1007/s11273-008-9128-0	ecological
291	boats	location/institutions	zoobenthos	ecosystems/species	undirected	10.1007/s11273-008-9128-0	ecological
291	lakes	location/institutions	anchoring	management	undirected	10.1007/s11273-008-9128-0	ecological
291	lakes	location/institutions	erosion	methods	undirected	10.1007/s11273-008-9128-0	ecological
291	lakes	location/institutions	habitats directive	management	undirected	10.1007/s11273-008-9128-0	ecological
291	lakes	location/institutions	littoral	location/institutions	undirected	10.1007/s11273-008-9128-0	ecological
291	lakes	location/institutions	mechanical damage	management	undirected	10.1007/s11273-008-9128-0	ecological
291	lakes	location/institutions	natura 2000	management	undirected	10.1007/s11273-008-9128-0	ecological
291	lakes	location/institutions	zoobenthos	ecosystems/species	undirected	10.1007/s11273-008-9128-0	ecological
291	littoral	location/institutions	anchoring	management	undirected	10.1007/s11273-008-9128-0	ecological
291	littoral	location/institutions	erosion	methods	undirected	10.1007/s11273-008-9128-0	ecological
291	littoral	location/institutions	habitats directive	management	undirected	10.1007/s11273-008-9128-0	ecological
291	littoral	location/institutions	mechanical damage	management	undirected	10.1007/s11273-008-9128-0	ecological
291	littoral	location/institutions	natura 2000	management	undirected	10.1007/s11273-008-9128-0	ecological
291	littoral	location/institutions	zoobenthos	ecosystems/species	undirected	10.1007/s11273-008-9128-0	ecological
293	sea cliffs	location/institutions	biodiversity hotspots	methods	undirected	10.1016/j.jnc.2008.10.002	ecological
293	sea cliffs	location/institutions	habitats directive	management	undirected	10.1016/j.jnc.2008.10.002	ecological
293	sea cliffs	location/institutions	land use change	methods	undirected	10.1016/j.jnc.2008.10.002	ecological
293	sea cliffs	location/institutions	mediterranean insular ecosystems	ecosystems/species	undirected	10.1016/j.jnc.2008.10.002	ecological
293	sea cliffs	location/institutions	secondary succession	methods	undirected	10.1016/j.jnc.2008.10.002	ecological
301	cee	location/institutions	civil society	management	undirected	10.1080/09644016.2010.508302	social and policies
301	cee	location/institutions	eu accession	management	undirected	10.1080/09644016.2010.508302	social and policies
301	cee	location/institutions	europeanisation	management	undirected	10.1080/09644016.2010.508302	social and policies
301	cee	location/institutions	natura 2000	management	undirected	10.1080/09644016.2010.508302	social and policies
301	cee	location/institutions	NGO	location/institutions	undirected	10.1080/09644016.2010.508302	social and policies
301	cee	location/institutions	state-society relations	methods	undirected	10.1080/09644016.2010.508302	social and policies
301	NGO	location/institutions	eu accession	management	undirected	10.1080/09644016.2010.508302	social and policies
301	NGO	location/institutions	europeanisation	management	undirected	10.1080/09644016.2010.508302	social and policies
301	NGO	location/institutions	natura 2000	management	undirected	10.1080/09644016.2010.508302	social and policies
301	NGO	location/institutions	state-society relations	methods	undirected	10.1080/09644016.2010.508302	social and policies
304	alps	location/institutions	calicioid species	ecosystems/species	undirected	10.1016/j.foreco.2010.05.016	ecological
304	alps	location/institutions	community nestedness	methods	undirected	10.1016/j.foreco.2010.05.016	ecological
304	alps	location/institutions	forest management	management	undirected	10.1016/j.foreco.2010.05.016	ecological
304	alps	location/institutions	rare species	ecosystems/species	undirected	10.1016/j.foreco.2010.05.016	ecological
304	alps	location/institutions	successional stage	methods	undirected	10.1016/j.foreco.2010.05.016	ecological
309	littoral zone	location/institutions	ecological functions	methods	undirected	10.1016/s0075-9511(04)80016-1	ecological
309	littoral zone	location/institutions	integrated quality assessment	methods	undirected	10.1016/s0075-9511(04)80016-1	ecological
309	littoral zone	location/institutions	lake shore deterioration	management	undirected	10.1016/s0075-9511(04)80016-1	ecological
309	littoral zone	location/institutions	wfd	management	undirected	10.1016/s0075-9511(04)80016-1	ecological
314	czech republic	location/institutions	agri-environment policy	management	undirected	10.1016/j.landusepol.2003.09.010	social and policies
314	czech republic	location/institutions	biodiversity	management	undirected	10.1016/j.landusepol.2003.09.010	social and policies
314	czech republic	location/institutions	environmental policy	management	undirected	10.1016/j.landusepol.2003.09.010	social and policies
314	czech republic	location/institutions	habitats directive	management	undirected	10.1016/j.landusepol.2003.09.010	social and policies
314	czech republic	location/institutions	less-favoured areas	methods	undirected	10.1016/j.landusepol.2003.09.010	social and policies
314	czech republic	location/institutions	natura 2000	management	undirected	10.1016/j.landusepol.2003.09.010	social and policies
314	czech republic	location/institutions	nature conservation	management	undirected	10.1016/j.landusepol.2003.09.010	social and policies
315	calanques of marseilles	location/institutions	bern convention	management	undirected	WOS:000262957700008	ecological
315	calanques of marseilles	location/institutions	habitats	ecosystems/species	undirected	WOS:000262957700008	ecological
315	calanques of marseilles	location/institutions	habitats directive	management	undirected	WOS:000262957700008	ecological
315	calanques of marseilles	location/institutions	tourist overfrequentation	methods	undirected	WOS:000262957700008	ecological
319	azores	location/institutions	mountain habitats	ecosystems/species	undirected	10.1007/s10531-010-9894-x	ecological
319	azores	location/institutions	natura 2000	management	undirected	10.1007/s10531-010-9894-x	ecological
319	azores	location/institutions	occult precipitation	methods	undirected	10.1007/s10531-010-9894-x	ecological
319	azores	location/institutions	past pasturing	management	undirected	10.1007/s10531-010-9894-x	ecological
319	azores	location/institutions	vegetation classification	methods	undirected	10.1007/s10531-010-9894-x	ecological
319	azores	location/institutions	wetness	methods	undirected	10.1007/s10531-010-9894-x	ecological
319	azores	location/institutions	wind exposure	methods	undirected	10.1007/s10531-010-9894-x	ecological
322	alpine region	location/institutions	cosmo-skymed	methods	undirected	10.1109/jstars.2013.2241735	ecological
322	alpine region	location/institutions	natura 2000	management	undirected	10.1109/jstars.2013.2241735	ecological
322	alpine region	location/institutions	signal backscatter	methods	undirected	10.1109/jstars.2013.2241735	ecological
325	slovenia	location/institutions	forest habitats	ecosystems/species	undirected	WOS:000260115400009	ecological
325	slovenia	location/institutions	forest plain communities	ecosystems/species	undirected	WOS:000260115400009	ecological
325	slovenia	location/institutions	natura 2000	management	undirected	WOS:000260115400009	ecological
325	slovenia	location/institutions	saproxylic beetles	ecosystems/species	undirected	WOS:000260115400009	ecological
326	appenines	location/institutions	invasive species	ecosystems/species	undirected	10.1007/s10531-012-0380-5	ecological
326	appenines	location/institutions	native deciduous forests	ecosystems/species	undirected	10.1007/s10531-012-0380-5	ecological
326	appenines	location/institutions	robinia pseudoacacia	ecosystems/species	undirected	10.1007/s10531-012-0380-5	ecological
326	appenines	location/institutions	stand age	methods	undirected	10.1007/s10531-012-0380-5	ecological
328	limestone escarpment	location/institutions	eutrophic forests	ecosystems/species	undirected	WOS:000272948500005	ecological
328	limestone escarpment	location/institutions	lunaria rediviva	ecosystems/species	undirected	WOS:000272948500005	ecological
328	limestone escarpment	location/institutions	natura 2000	management	undirected	WOS:000272948500005	ecological
328	limestone escarpment	location/institutions	rendzic leptosols	location/institutions	undirected	WOS:000272948500005	ecological
328	limestone escarpment	location/institutions	soil complexes	location/institutions	undirected	WOS:000272948500005	ecological
328	rendzic leptosols	location/institutions	eutrophic forests	ecosystems/species	undirected	WOS:000272948500005	ecological
328	rendzic leptosols	location/institutions	lunaria rediviva	ecosystems/species	undirected	WOS:000272948500005	ecological
328	rendzic leptosols	location/institutions	natura 2000	management	undirected	WOS:000272948500005	ecological
328	rendzic leptosols	location/institutions	soil complexes	location/institutions	undirected	WOS:000272948500005	ecological
328	soil complexes	location/institutions	eutrophic forests	ecosystems/species	undirected	WOS:000272948500005	ecological
328	soil complexes	location/institutions	lunaria rediviva	ecosystems/species	undirected	WOS:000272948500005	ecological
328	soil complexes	location/institutions	natura 2000	management	undirected	WOS:000272948500005	ecological
329	offshore wind farm	location/institutions	appropriate assessment	methods	undirected	10.1016/j.eiar.2013.06.005	ecological
329	offshore wind farm	location/institutions	disturbance	methods	undirected	10.1016/j.eiar.2013.06.005	ecological
329	offshore wind farm	location/institutions	habitats directive	management	undirected	10.1016/j.eiar.2013.06.005	ecological
329	offshore wind farm	location/institutions	marine mammals	ecosystems/species	undirected	10.1016/j.eiar.2013.06.005	ecological
329	offshore wind farm	location/institutions	population consequences	methods	undirected	10.1016/j.eiar.2013.06.005	ecological
330	scotland	location/institutions	biodiversity	management	undirected	10.1111/conl.12012	social and policies
330	scotland	location/institutions	co-management	management	undirected	10.1111/conl.12012	social and policies
330	scotland	location/institutions	cross-scale interactions	methods	undirected	10.1111/conl.12012	social and policies
330	scotland	location/institutions	human-environment systems	methods	undirected	10.1111/conl.12012	social and policies
330	scotland	location/institutions	natura 2000	management	undirected	10.1111/conl.12012	social and policies
330	scotland	location/institutions	public participation	management	undirected	10.1111/conl.12012	social and policies
330	scotland	location/institutions	spatial scale	methods	undirected	10.1111/conl.12012	social and policies
330	scotland	location/institutions	sci	management	undirected	10.1111/conl.12012	social and policies
331	iczm	location/institutions	environmental governance	management	undirected	10.1016/j.landusepol.2012.08.010	social and policies
331	iczm	location/institutions	environmental territorial management	management	undirected	10.1016/j.landusepol.2012.08.010	social and policies
334	management units	location/institutions	allozyme electrophoresis	methods	undirected	10.1007/s10592-008-9606-1	ecological
334	management units	location/institutions	habitats directive	management	undirected	10.1007/s10592-008-9606-1	ecological
334	management units	location/institutions	population genetics	methods	undirected	10.1007/s10592-008-9606-1	ecological
334	management units	location/institutions	power of dispersal	methods	undirected	10.1007/s10592-008-9606-1	ecological
335	hudewald	location/institutions	agroforestry	management	undirected	10.1007/s10531-010-9872-3	ecological
335	hudewald	location/institutions	dehesa	methods	undirected	10.1007/s10531-010-9872-3	ecological
335	hudewald	location/institutions	habitats directive	management	undirected	10.1007/s10531-010-9872-3	ecological
335	hudewald	location/institutions	pasture woodland	ecosystems/species	undirected	10.1007/s10531-010-9872-3	ecological
335	hudewald	location/institutions	silvopastoralism	management	undirected	10.1007/s10531-010-9872-3	ecological
335	hudewald	location/institutions	traditional land-use	management	undirected	10.1007/s10531-010-9872-3	ecological
336	eu	location/institutions	coastal squeezing	methods	undirected	10.1007/s13157-011-0179-2	ecological
336	eu	location/institutions	habitat loss	management	undirected	10.1007/s13157-011-0179-2	ecological
336	eu	location/institutions	microtopography	location/institutions	undirected	10.1007/s13157-011-0179-2	ecological
336	eu	location/institutions	natura 2000	management	undirected	10.1007/s13157-011-0179-2	ecological
336	eu	location/institutions	plant diversity	methods	undirected	10.1007/s13157-011-0179-2	ecological
337	tuscany	location/institutions	bird richness	methods	undirected	10.1007/s10531-011-0054-8	ecological
337	tuscany	location/institutions	conservation	management	undirected	10.1007/s10531-011-0054-8	ecological
337	tuscany	location/institutions	distribution maps	methods	undirected	10.1007/s10531-011-0054-8	ecological
337	tuscany	location/institutions	natura 2000	management	undirected	10.1007/s10531-011-0054-8	ecological
337	tuscany	location/institutions	ndvi	methods	undirected	10.1007/s10531-011-0054-8	ecological
337	tuscany	location/institutions	predictive modelling	methods	undirected	10.1007/s10531-011-0054-8	ecological
337	tuscany	location/institutions	semivariance	methods	undirected	10.1007/s10531-011-0054-8	ecological
337	tuscany	location/institutions	spatial autocorrelation	methods	undirected	10.1007/s10531-011-0054-8	ecological
341	kremnicke vrchy mountains	location/institutions	flora	ecosystems/species	undirected	WOS:000276684900010	ecological
341	kremnicke vrchy mountains	location/institutions	grassland monitoring	methods	undirected	WOS:000276684900010	ecological
341	kremnicke vrchy mountains	location/institutions	starohorske	ecosystems/species	undirected	WOS:000276684900010	ecological
341	kremnicke vrchy mountains	location/institutions	vegetation	ecosystems/species	undirected	WOS:000276684900010	ecological
341	kremnicke vrchy mountains	location/institutions	vrchy mountains	location/institutions	undirected	WOS:000276684900010	ecological
341	vrchy mountains	location/institutions	flora	ecosystems/species	undirected	WOS:000276684900010	ecological
341	vrchy mountains	location/institutions	grassland monitoring	methods	undirected	WOS:000276684900010	ecological
341	vrchy mountains	location/institutions	starohorske	ecosystems/species	undirected	WOS:000276684900010	ecological
341	vrchy mountains	location/institutions	vegetation	ecosystems/species	undirected	WOS:000276684900010	ecological
346	seabed	location/institutions	ecosystem-based management	methods	undirected	10.5697/oc.55-1.167	ecological
346	seabed	location/institutions	habitat modelling	methods	undirected	10.5697/oc.55-1.167	ecological
346	seabed	location/institutions	sdm	methods	undirected	10.5697/oc.55-1.167	ecological
346	seabed	location/institutions	spatial and temporal boundaries	methods	undirected	10.5697/oc.55-1.167	ecological
351	spain	location/institutions	cultural landscapes	management	undirected	10.1007/s10531-004-8226-4	ecological
351	spain	location/institutions	habitat management	management	undirected	10.1007/s10531-004-8226-4	ecological
351	spain	location/institutions	hierarchical habitat selection	methods	undirected	10.1007/s10531-004-8226-4	ecological
351	spain	location/institutions	natura 2000	management	undirected	10.1007/s10531-004-8226-4	ecological
351	spain	location/institutions	testudo graeca	ecosystems/species	undirected	10.1007/s10531-004-8226-4	ecological
351	spain	location/institutions	vegetational succession	methods	undirected	10.1007/s10531-004-8226-4	ecological
352	germany	location/institutions	carnivore conservation	management	undirected	10.1016/j.biocon.2007.10.004	ecological
352	germany	location/institutions	felis silvestris	ecosystems/species	undirected	10.1016/j.biocon.2007.10.004	ecological
352	germany	location/institutions	glm	methods	undirected	10.1016/j.biocon.2007.10.004	ecological
352	germany	location/institutions	habitat selection	methods	undirected	10.1016/j.biocon.2007.10.004	ecological
352	germany	location/institutions	habitats directive	management	undirected	10.1016/j.biocon.2007.10.004	ecological
358	mesma	location/institutions	age classes	methods	undirected	10.1016/j.rse.2012.08.029	ecological
358	mesma	location/institutions	ahs hyperspectral data	methods	undirected	10.1016/j.rse.2012.08.029	ecological
358	mesma	location/institutions	calluna vulgaris	ecosystems/species	undirected	10.1016/j.rse.2012.08.029	ecological
358	mesma	location/institutions	habitat status	methods	undirected	10.1016/j.rse.2012.08.029	ecological
358	mesma	location/institutions	natura 2000	management	undirected	10.1016/j.rse.2012.08.029	ecological
358	mesma	location/institutions	unmixing	methods	undirected	10.1016/j.rse.2012.08.029	ecological
360	greece	location/institutions	habitat diversity	methods	undirected	10.1111/j.1466-8238.2008.00393.x	ecological
360	greece	location/institutions	habitat heterogeneity	methods	undirected	10.1111/j.1466-8238.2008.00393.x	ecological
360	greece	location/institutions	natura 2000	management	undirected	10.1111/j.1466-8238.2008.00393.x	ecological
360	greece	location/institutions	scale dependency	methods	undirected	10.1111/j.1466-8238.2008.00393.x	ecological
360	greece	location/institutions	species richness	methods	undirected	10.1111/j.1466-8238.2008.00393.x	ecological
360	greece	location/institutions	species-area relationship	methods	undirected	10.1111/j.1466-8238.2008.00393.x	ecological
361	mediterranean sea	location/institutions	habitat classification	methods	undirected	10.1016/j.jembe.2008.07.015	social and policies
361	mediterranean sea	location/institutions	habitats directive	management	undirected	10.1016/j.jembe.2008.07.015	social and policies
361	mediterranean sea	location/institutions	mapping	methods	undirected	10.1016/j.jembe.2008.07.015	social and policies
367	sardinia	location/institutions	biodiversity conservation	management	undirected	10.1080/11263504.2013.861540	ecological
367	sardinia	location/institutions	habitats directive	management	undirected	10.1080/11263504.2013.861540	ecological
367	sardinia	location/institutions	mediterranean dune vegetation	ecosystems/species	undirected	10.1080/11263504.2013.861540	ecological
367	sardinia	location/institutions	trampling	management	undirected	10.1080/11263504.2013.861540	ecological
377	wader	location/institutions	cockling	ecosystems/species	undirected	10.1111/j.1365-2664.2009.01760.x	ecological
377	wader	location/institutions	dredging	management	undirected	10.1111/j.1365-2664.2009.01760.x	ecological
377	wader	location/institutions	eutrophication	methods	undirected	10.1111/j.1365-2664.2009.01760.x	ecological
377	wader	location/institutions	sediment disturbance	management	undirected	10.1111/j.1365-2664.2009.01760.x	ecological
377	wader	location/institutions	shellfishing	management	undirected	10.1111/j.1365-2664.2009.01760.x	ecological
377	wader	location/institutions	shorebirds	ecosystems/species	undirected	10.1111/j.1365-2664.2009.01760.x	ecological
377	wader	location/institutions	spa	management	undirected	10.1111/j.1365-2664.2009.01760.x	ecological
379	bioregions	location/institutions	beech forests	ecosystems/species	undirected	10.1111/j.1752-4598.2012.00200.x	ecological
379	bioregions	location/institutions	conservation strategies	methods	undirected	10.1111/j.1752-4598.2012.00200.x	ecological
379	bioregions	location/institutions	multiplicative beta diversity partitioning	methods	undirected	10.1111/j.1752-4598.2012.00200.x	ecological
379	bioregions	location/institutions	natura 2000	management	undirected	10.1111/j.1752-4598.2012.00200.x	ecological
380	ephemeral lakes	location/institutions	habitat variability	methods	undirected	10.1007/s10750-009-9971-x	ecological
380	ephemeral lakes	location/institutions	habitats directive	management	undirected	10.1007/s10750-009-9971-x	ecological
380	ephemeral lakes	location/institutions	macroinvertebrates	ecosystems/species	undirected	10.1007/s10750-009-9971-x	ecological
380	ephemeral lakes	location/institutions	turloughs	ecosystems/species	undirected	10.1007/s10750-009-9971-x	ecological
380	ephemeral lakes	location/institutions	wfd	management	undirected	10.1007/s10750-009-9971-x	ecological
383	carpathians	location/institutions	blaps	ecosystems/species	undirected	10.1111/j.1752-4598.2011.00146.x	ecological
383	carpathians	location/institutions	continental grassland	ecosystems/species	undirected	10.1111/j.1752-4598.2011.00146.x	ecological
383	carpathians	location/institutions	longhorn beetle	ecosystems/species	undirected	10.1111/j.1752-4598.2011.00146.x	ecological
383	carpathians	location/institutions	natura 2000	management	undirected	10.1111/j.1752-4598.2011.00146.x	ecological
383	carpathians	location/institutions	oil beetle	ecosystems/species	undirected	10.1111/j.1752-4598.2011.00146.x	ecological
383	carpathians	location/institutions	sex-dependent habitat selection	methods	undirected	10.1111/j.1752-4598.2011.00146.x	ecological
388	bavarian forest national park	location/institutions	bayes model	methods	undirected	10.1007/s12224-012-9150-0	ecological
388	bavarian forest national park	location/institutions	ecological preference function	methods	undirected	10.1007/s12224-012-9150-0	ecological
388	bavarian forest national park	location/institutions	habitats directive	management	undirected	10.1007/s12224-012-9150-0	ecological
388	bavarian forest national park	location/institutions	naturalness	methods	undirected	10.1007/s12224-012-9150-0	ecological
388	bavarian forest national park	location/institutions	sumava national park	location/institutions	undirected	10.1007/s12224-012-9150-0	ecological
388	sumava national park	location/institutions	bayes model	methods	undirected	10.1007/s12224-012-9150-0	ecological
388	sumava national park	location/institutions	ecological preference function	methods	undirected	10.1007/s12224-012-9150-0	ecological
388	sumava national park	location/institutions	habitats directive	management	undirected	10.1007/s12224-012-9150-0	ecological
388	sumava national park	location/institutions	naturalness	methods	undirected	10.1007/s12224-012-9150-0	ecological
393	poland	location/institutions	carabidae	ecosystems/species	undirected	WOS:000289577100007	ecological
393	poland	location/institutions	floodplain	ecosystems/species	undirected	WOS:000289577100007	ecological
393	poland	location/institutions	natura 2000	management	undirected	WOS:000289577100007	ecological
393	poland	location/institutions	vistula river	location/institutions	undirected	WOS:000289577100007	ecological
393	vistula river	location/institutions	carabidae	ecosystems/species	undirected	WOS:000289577100007	ecological
393	vistula river	location/institutions	floodplain	ecosystems/species	undirected	WOS:000289577100007	ecological
393	vistula river	location/institutions	natura 2000	management	undirected	WOS:000289577100007	ecological
396	portugal	location/institutions	boosted regression trees	methods	undirected	10.1016/j.biocon.2012.11.013	ecological
396	portugal	location/institutions	lampetra fluviatilis	ecosystems/species	undirected	10.1016/j.biocon.2012.11.013	ecological
396	portugal	location/institutions	lampetra planeri	ecosystems/species	undirected	10.1016/j.biocon.2012.11.013	ecological
396	portugal	location/institutions	predictive modelling	methods	undirected	10.1016/j.biocon.2012.11.013	ecological
396	portugal	location/institutions	threatened species	ecosystems/species	undirected	10.1016/j.biocon.2012.11.013	ecological
397	eu	location/institutions	biodiversity	management	undirected	10.1016/s1389-9341(01)00070-3	social and policies
397	eu	location/institutions	eu accession	management	undirected	10.1016/s1389-9341(01)00070-3	social and policies
397	eu	location/institutions	forest policy	management	undirected	10.1016/s1389-9341(01)00070-3	social and policies
397	eu	location/institutions	governance	management	undirected	10.1016/s1389-9341(01)00070-3	social and policies
397	eu	location/institutions	multi-level governance	methods	undirected	10.1016/s1389-9341(01)00070-3	social and policies
397	eu	location/institutions	natura 2000	management	undirected	10.1016/s1389-9341(01)00070-3	social and policies
397	eu	location/institutions	NGO	location/institutions	undirected	10.1016/s1389-9341(01)00070-3	social and policies
397	NGO	location/institutions	biodiversity	management	undirected	10.1016/s1389-9341(01)00070-3	social and policies
397	NGO	location/institutions	eu accession	management	undirected	10.1016/s1389-9341(01)00070-3	social and policies
397	NGO	location/institutions	forest policy	management	undirected	10.1016/s1389-9341(01)00070-3	social and policies
397	NGO	location/institutions	governance	management	undirected	10.1016/s1389-9341(01)00070-3	social and policies
397	NGO	location/institutions	multi-level governance	methods	undirected	10.1016/s1389-9341(01)00070-3	social and policies
397	NGO	location/institutions	natura 2000	management	undirected	10.1016/s1389-9341(01)00070-3	social and policies
398	estuary	location/institutions	agricultural runoff	management	undirected	10.1016/j.agee.2012.02.006	ecological
398	estuary	location/institutions	chemtax	methods	undirected	10.1016/j.agee.2012.02.006	ecological
398	estuary	location/institutions	eutrophication	methods	undirected	10.1016/j.agee.2012.02.006	ecological
398	estuary	location/institutions	mediterranean	location/institutions	undirected	10.1016/j.agee.2012.02.006	ecological
398	estuary	location/institutions	photosynthetic pigments	methods	undirected	10.1016/j.agee.2012.02.006	ecological
398	mediterranean	location/institutions	agricultural runoff	management	undirected	10.1016/j.agee.2012.02.006	ecological
398	mediterranean	location/institutions	chemtax	methods	undirected	10.1016/j.agee.2012.02.006	ecological
398	mediterranean	location/institutions	eutrophication	methods	undirected	10.1016/j.agee.2012.02.006	ecological
398	mediterranean	location/institutions	photosynthetic pigments	methods	undirected	10.1016/j.agee.2012.02.006	ecological
399	italy	location/institutions	community composition	methods	undirected	10.1111/jbi.12182	ecological
399	italy	location/institutions	land use change	methods	undirected	10.1111/jbi.12182	ecological
399	italy	location/institutions	mediterranean forests	ecosystems/species	undirected	10.1111/jbi.12182	ecological
399	italy	location/institutions	natura 2000	management	undirected	10.1111/jbi.12182	ecological
399	italy	location/institutions	species richness	methods	undirected	10.1111/jbi.12182	ecological
399	italy	location/institutions	successional age	methods	undirected	10.1111/jbi.12182	ecological
399	italy	location/institutions	tuscany	location/institutions	undirected	10.1111/jbi.12182	ecological
399	italy	location/institutions	variation partitioning	methods	undirected	10.1111/jbi.12182	ecological
399	tuscany	location/institutions	community composition	methods	undirected	10.1111/jbi.12182	ecological
399	tuscany	location/institutions	land use change	methods	undirected	10.1111/jbi.12182	ecological
399	tuscany	location/institutions	mediterranean forests	ecosystems/species	undirected	10.1111/jbi.12182	ecological
399	tuscany	location/institutions	natura 2000	management	undirected	10.1111/jbi.12182	ecological
399	tuscany	location/institutions	species richness	methods	undirected	10.1111/jbi.12182	ecological
399	tuscany	location/institutions	successional age	methods	undirected	10.1111/jbi.12182	ecological
399	tuscany	location/institutions	variation partitioning	methods	undirected	10.1111/jbi.12182	ecological
401	cyprus	location/institutions	genetic diversity	methods	undirected	10.1016/j.actao.2011.02.007	ecological
401	cyprus	location/institutions	habitats directive	management	undirected	10.1016/j.actao.2011.02.007	ecological
401	cyprus	location/institutions	monitoring	methods	undirected	10.1016/j.actao.2011.02.007	ecological
401	cyprus	location/institutions	plant conservation	methods	undirected	10.1016/j.actao.2011.02.007	ecological
401	cyprus	location/institutions	reproductive biology	methods	undirected	10.1016/j.actao.2011.02.007	ecological
401	cyprus	location/institutions	threatened species	ecosystems/species	undirected	10.1016/j.actao.2011.02.007	ecological
402	agripolis	location/institutions	mea-scope	methods	undirected	10.1016/j.envsci.2009.01.001	social and policies
402	agripolis	location/institutions	modam	methods	undirected	10.1016/j.envsci.2009.01.001	social and policies
402	agripolis	location/institutions	natura 2000	management	undirected	10.1016/j.envsci.2009.01.001	social and policies
402	agripolis	location/institutions	semivariance	methods	undirected	10.1016/j.envsci.2009.01.001	social and policies
402	agripolis	location/institutions	structural change	methods	undirected	10.1016/j.envsci.2009.01.001	social and policies
404	italy	location/institutions	biodiversity	management	undirected	WOS:000285855600010	ecological
404	italy	location/institutions	biogeography	methods	undirected	WOS:000285855600010	ecological
404	italy	location/institutions	habitats directive	management	undirected	WOS:000285855600010	ecological
404	italy	location/institutions	italian forests	ecosystems/species	undirected	WOS:000285855600010	ecological
404	italy	location/institutions	phytosociology	methods	undirected	WOS:000285855600010	ecological
406	ireland	location/institutions	agri-environment policy	management	undirected	10.1016/j.landusepol.2006.04.004	social and policies
406	ireland	location/institutions	conservation	management	undirected	10.1016/j.landusepol.2006.04.004	social and policies
406	ireland	location/institutions	high nature value farmland	management	undirected	10.1016/j.landusepol.2006.04.004	social and policies
406	ireland	location/institutions	marginal land	methods	undirected	10.1016/j.landusepol.2006.04.004	social and policies
406	ireland	location/institutions	natura 2000	management	undirected	10.1016/j.landusepol.2006.04.004	social and policies
406	ireland	location/institutions	q-methodology	methods	undirected	10.1016/j.landusepol.2006.04.004	social and policies
406	ireland	location/institutions	reps	location/institutions	undirected	10.1016/j.landusepol.2006.04.004	social and policies
406	ireland	location/institutions	turloughs	ecosystems/species	undirected	10.1016/j.landusepol.2006.04.004	social and policies
406	reps	location/institutions	agri-environment policy	management	undirected	10.1016/j.landusepol.2006.04.004	social and policies
406	reps	location/institutions	conservation	management	undirected	10.1016/j.landusepol.2006.04.004	social and policies
406	reps	location/institutions	high nature value farmland	management	undirected	10.1016/j.landusepol.2006.04.004	social and policies
406	reps	location/institutions	marginal land	methods	undirected	10.1016/j.landusepol.2006.04.004	social and policies
406	reps	location/institutions	natura 2000	management	undirected	10.1016/j.landusepol.2006.04.004	social and policies
406	reps	location/institutions	q-methodology	methods	undirected	10.1016/j.landusepol.2006.04.004	social and policies
406	reps	location/institutions	turloughs	ecosystems/species	undirected	10.1016/j.landusepol.2006.04.004	social and policies
408	sudety mountains	location/institutions	dendrochronology	methods	undirected	10.1177/0959683608100567	ecological
408	sudety mountains	location/institutions	natura 2000	management	undirected	10.1177/0959683608100567	ecological
408	sudety mountains	location/institutions	peat stratigraphy	methods	undirected	10.1177/0959683608100567	ecological
408	sudety mountains	location/institutions	raised mire	ecosystems/species	undirected	10.1177/0959683608100567	ecological
408	sudety mountains	location/institutions	stand structure	methods	undirected	10.1177/0959683608100567	ecological
408	sudety mountains	location/institutions	vegetation dynamics	methods	undirected	10.1177/0959683608100567	ecological
409	eu	location/institutions	connectedness	methods	undirected	10.1016/j.biocon.2013.06.019	ecological
409	eu	location/institutions	connectivity	methods	undirected	10.1016/j.biocon.2013.06.019	ecological
409	eu	location/institutions	federal states	location/institutions	undirected	10.1016/j.biocon.2013.06.019	ecological
409	eu	location/institutions	habitats directive	management	undirected	10.1016/j.biocon.2013.06.019	ecological
409	eu	location/institutions	internal borders	management	undirected	10.1016/j.biocon.2013.06.019	ecological
409	eu	location/institutions	natura 2000	management	undirected	10.1016/j.biocon.2013.06.019	ecological
409	federal states	location/institutions	connectedness	methods	undirected	10.1016/j.biocon.2013.06.019	ecological
409	federal states	location/institutions	connectivity	methods	undirected	10.1016/j.biocon.2013.06.019	ecological
409	federal states	location/institutions	habitats directive	management	undirected	10.1016/j.biocon.2013.06.019	ecological
409	federal states	location/institutions	internal borders	management	undirected	10.1016/j.biocon.2013.06.019	ecological
409	federal states	location/institutions	natura 2000	management	undirected	10.1016/j.biocon.2013.06.019	ecological
410	soil seed bank	location/institutions	germination ecology	methods	undirected	10.1111/j.1442-1984.2008.00212.x	ecological
410	soil seed bank	location/institutions	habitats directive	management	undirected	10.1111/j.1442-1984.2008.00212.x	ecological
410	soil seed bank	location/institutions	rare plant species	ecosystems/species	undirected	10.1111/j.1442-1984.2008.00212.x	ecological
410	soil seed bank	location/institutions	seed buoyancy	methods	undirected	10.1111/j.1442-1984.2008.00212.x	ecological
413	lakes	location/institutions	bioassessment	methods	undirected	10.1002/aqc.673	ecological
413	lakes	location/institutions	conservation	management	undirected	10.1002/aqc.673	ecological
413	lakes	location/institutions	macrophytes	ecosystems/species	undirected	10.1002/aqc.673	ecological
413	lakes	location/institutions	monitoring	methods	undirected	10.1002/aqc.673	ecological
413	lakes	location/institutions	najas flexilis	ecosystems/species	undirected	10.1002/aqc.673	ecological
421	finland	location/institutions	habitats directive	management	undirected	10.1093/jel/eqs015	social and policies
421	finland	location/institutions	legitimacy	methods	undirected	10.1093/jel/eqs015	social and policies
421	finland	location/institutions	nature conservation	management	undirected	10.1093/jel/eqs015	social and policies
421	finland	location/institutions	regulation	management	undirected	10.1093/jel/eqs015	social and policies
421	finland	location/institutions	wolves	ecosystems/species	undirected	10.1093/jel/eqs015	social and policies
422	portugal	location/institutions	butterflies	ecosystems/species	undirected	WOS:000316959900001	ecological
422	portugal	location/institutions	distribution	methods	undirected	WOS:000316959900001	ecological
422	portugal	location/institutions	insects	ecosystems/species	undirected	WOS:000316959900001	ecological
422	portugal	location/institutions	tejo internacional	location/institutions	undirected	WOS:000316959900001	ecological
422	tejo internacional	location/institutions	butterflies	ecosystems/species	undirected	WOS:000316959900001	ecological
422	tejo internacional	location/institutions	distribution	methods	undirected	WOS:000316959900001	ecological
422	tejo internacional	location/institutions	insects	ecosystems/species	undirected	WOS:000316959900001	ecological
424	iberian	location/institutions	connectivity	methods	undirected	10.1007/s10980-012-9704-9	ecological
424	iberian	location/institutions	environmental surrogates	methods	undirected	10.1007/s10980-012-9704-9	ecological
424	iberian	location/institutions	graph theory	methods	undirected	10.1007/s10980-012-9704-9	ecological
424	iberian	location/institutions	minimum steiner tree problem	methods	undirected	10.1007/s10980-012-9704-9	ecological
424	iberian	location/institutions	protected areas	management	undirected	10.1007/s10980-012-9704-9	ecological
424	iberian	location/institutions	spatial conservation planning	methods	undirected	10.1007/s10980-012-9704-9	ecological
425	north sea	location/institutions	directives	management	undirected	10.1016/j.envsci.2010.11.005	social and policies
425	north sea	location/institutions	ecological risk assessment	methods	undirected	10.1016/j.envsci.2010.11.005	social and policies
425	north sea	location/institutions	marine strategy framework	management	undirected	10.1016/j.envsci.2010.11.005	social and policies
425	north sea	location/institutions	natura 2000	management	undirected	10.1016/j.envsci.2010.11.005	social and policies
425	north sea	location/institutions	pressure-state-response models	methods	undirected	10.1016/j.envsci.2010.11.005	social and policies
430	lithuania	location/institutions	forest felling	methods	undirected	10.1007/s10531-008-9470-9	ecological
430	lithuania	location/institutions	muscardinus avellanarius	ecosystems/species	undirected	10.1007/s10531-008-9470-9	ecological
430	lithuania	location/institutions	nestbox grid	methods	undirected	10.1007/s10531-008-9470-9	ecological
430	lithuania	location/institutions	population density	methods	undirected	10.1007/s10531-008-9470-9	ecological
431	loch leven	location/institutions	local scale	methods	undirected	10.1007/s10750-011-0927-6	ecological
431	loch leven	location/institutions	national scale	methods	undirected	10.1007/s10750-011-0927-6	ecological
431	loch leven	location/institutions	trend comparison	methods	undirected	10.1007/s10750-011-0927-6	ecological
431	loch leven	location/institutions	waterfowl	ecosystems/species	undirected	10.1007/s10750-011-0927-6	ecological
432	italy	location/institutions	global strategy for plant conservation	management	undirected	10.1007/s10531-012-0283-5	ecological
432	italy	location/institutions	methods	methods	undirected	10.1007/s10531-012-0283-5	ecological
432	italy	location/institutions	site selection	methods	undirected	10.1007/s10531-012-0283-5	ecological
433	volcanic lakes	location/institutions	aquatic plants	ecosystems/species	undirected	10.1080/11263504.2013.772080	ecological
433	volcanic lakes	location/institutions	conservation	management	undirected	10.1080/11263504.2013.772080	ecological
433	volcanic lakes	location/institutions	freshwater habitats	ecosystems/species	undirected	10.1080/11263504.2013.772080	ecological
433	volcanic lakes	location/institutions	habitats directive	management	undirected	10.1080/11263504.2013.772080	ecological
435	serra da estrela	location/institutions	habitats	ecosystems/species	undirected	WOS:000284202800006	ecological
435	serra da estrela	location/institutions	management	management	undirected	WOS:000284202800006	ecological
435	serra da estrela	location/institutions	natura 2000	management	undirected	WOS:000284202800006	ecological
436	uk	location/institutions	habitats directive	management	undirected	10.1016/j.jnc.2008.12.005	social and policies
436	uk	location/institutions	management planning	methods	undirected	10.1016/j.jnc.2008.12.005	social and policies
436	uk	location/institutions	nnr	methods	undirected	10.1016/j.jnc.2008.12.005	social and policies
436	uk	location/institutions	objectives	management	undirected	10.1016/j.jnc.2008.12.005	social and policies
436	uk	location/institutions	ramsar convention	management	undirected	10.1016/j.jnc.2008.12.005	social and policies
436	uk	location/institutions	sssi	management	undirected	10.1016/j.jnc.2008.12.005	social and policies
440	baltic sea	location/institutions	fishing effort	methods	undirected	10.1016/j.marpol.2008.12.007	ecological
440	baltic sea	location/institutions	logbooks	methods	undirected	10.1016/j.marpol.2008.12.007	ecological
440	baltic sea	location/institutions	mpa	management	undirected	10.1016/j.marpol.2008.12.007	ecological
440	baltic sea	location/institutions	north sea	location/institutions	undirected	10.1016/j.marpol.2008.12.007	ecological
440	baltic sea	location/institutions	spatial conservation planning	methods	undirected	10.1016/j.marpol.2008.12.007	ecological
440	baltic sea	location/institutions	vector machines	methods	undirected	10.1016/j.marpol.2008.12.007	ecological
440	north sea	location/institutions	fishing effort	methods	undirected	10.1016/j.marpol.2008.12.007	ecological
440	north sea	location/institutions	logbooks	methods	undirected	10.1016/j.marpol.2008.12.007	ecological
440	north sea	location/institutions	mpa	management	undirected	10.1016/j.marpol.2008.12.007	ecological
440	north sea	location/institutions	spatial conservation planning	methods	undirected	10.1016/j.marpol.2008.12.007	ecological
440	north sea	location/institutions	vector machines	methods	undirected	10.1016/j.marpol.2008.12.007	ecological
441	lakes	location/institutions	aquatic plants	ecosystems/species	undirected	10.1002/aqc.1144	ecological
441	lakes	location/institutions	habitats directive	management	undirected	10.1002/aqc.1144	ecological
441	lakes	location/institutions	remote sensing	methods	undirected	10.1002/aqc.1144	ecological
441	lakes	location/institutions	vector machines	methods	undirected	10.1002/aqc.1144	ecological
441	lakes	location/institutions	wfd	management	undirected	10.1002/aqc.1144	ecological
443	uk	location/institutions	mpa	management	undirected	10.1016/s0308-597x(98)00056-6	social and policies
443	uk	location/institutions	voluntary vs statutory approaches	methods	undirected	10.1016/s0308-597x(98)00056-6	social and policies
444	portugal	location/institutions	gap analysis	methods	undirected	10.1016/j.biocon.2003.10.006	ecological
444	portugal	location/institutions	natura 2000	management	undirected	10.1016/j.biocon.2003.10.006	ecological
444	portugal	location/institutions	reserve design	methods	undirected	10.1016/j.biocon.2003.10.006	ecological
444	portugal	location/institutions	sensitivity analysis	methods	undirected	10.1016/j.biocon.2003.10.006	ecological
445	andalusia	location/institutions	fuzzy logic	methods	undirected	10.1016/j.ecolind.2012.10.019	ecological
445	andalusia	location/institutions	insecurity index	methods	undirected	10.1016/j.ecolind.2012.10.019	ecological
445	andalusia	location/institutions	protected areas	management	undirected	10.1016/j.ecolind.2012.10.019	ecological
445	andalusia	location/institutions	raptors	ecosystems/species	undirected	10.1016/j.ecolind.2012.10.019	ecological
445	andalusia	location/institutions	sdm	methods	undirected	10.1016/j.ecolind.2012.10.019	ecological
457	alpine rock ptarmigan	location/institutions	habitat monitoring	methods	undirected	10.1016/j.ecolmodel.2013.01.008	ecological
457	alpine rock ptarmigan	location/institutions	habitats	ecosystems/species	undirected	10.1016/j.ecolmodel.2013.01.008	ecological
457	alpine rock ptarmigan	location/institutions	ikonos	methods	undirected	10.1016/j.ecolmodel.2013.01.008	ecological
457	alpine rock ptarmigan	location/institutions	image classification	methods	undirected	10.1016/j.ecolmodel.2013.01.008	ecological
457	alpine rock ptarmigan	location/institutions	obia	methods	undirected	10.1016/j.ecolmodel.2013.01.008	ecological
457	alpine rock ptarmigan	location/institutions	sdm	methods	undirected	10.1016/j.ecolmodel.2013.01.008	ecological
469	mediterranean basin	location/institutions	biodiversity hotspots	methods	undirected	10.1080/11263504.2011.642417	ecological
469	mediterranean basin	location/institutions	conservation	management	undirected	10.1080/11263504.2011.642417	ecological
469	mediterranean basin	location/institutions	endemic plants	ecosystems/species	undirected	10.1080/11263504.2011.642417	ecological
469	mediterranean basin	location/institutions	habitats directive	management	undirected	10.1080/11263504.2011.642417	ecological
469	mediterranean basin	location/institutions	iucn red list	management	undirected	10.1080/11263504.2011.642417	ecological
469	mediterranean basin	location/institutions	priority index	methods	undirected	10.1080/11263504.2011.642417	ecological
470	eu	location/institutions	amphibian decline	methods	undirected	10.1007/s10531-012-0343-x	ecological
470	eu	location/institutions	distribution atlas	methods	undirected	10.1007/s10531-012-0343-x	ecological
470	eu	location/institutions	iucn red list	management	undirected	10.1007/s10531-012-0343-x	ecological
470	eu	location/institutions	newts	ecosystems/species	undirected	10.1007/s10531-012-0343-x	ecological
470	eu	location/institutions	spatial scale	methods	undirected	10.1007/s10531-012-0343-x	ecological
470	eu	location/institutions	triturus cristatus	ecosystems/species	undirected	10.1007/s10531-012-0343-x	ecological
471	eu	location/institutions	butterflies	ecosystems/species	undirected	10.1111/conl.12030	social and policies
471	eu	location/institutions	conservation policy	management	undirected	10.1111/conl.12030	social and policies
471	eu	location/institutions	habitats directive	management	undirected	10.1111/conl.12030	social and policies
472	eu	location/institutions	eia	methods	undirected	10.1016/j.eiar.2009.02.001	social and policies
472	eu	location/institutions	environmental planning	management	undirected	10.1016/j.eiar.2009.02.001	social and policies
472	eu	location/institutions	habitats directive	management	undirected	10.1016/j.eiar.2009.02.001	social and policies
472	eu	location/institutions	planning methods	methods	undirected	10.1016/j.eiar.2009.02.001	social and policies
472	eu	location/institutions	planning strategies	methods	undirected	10.1016/j.eiar.2009.02.001	social and policies
472	eu	location/institutions	precaution	methods	undirected	10.1016/j.eiar.2009.02.001	social and policies
472	eu	location/institutions	sea	methods	undirected	10.1016/j.eiar.2009.02.001	social and policies
472	eu	location/institutions	wfd	management	undirected	10.1016/j.eiar.2009.02.001	social and policies
478	sardinia	location/institutions	conservation	management	undirected	10.1016/j.crvi.2010.06.006	ecological
478	sardinia	location/institutions	habitats directive	management	undirected	10.1016/j.crvi.2010.06.006	ecological
478	sardinia	location/institutions	mediterranean temporary ponds	ecosystems/species	undirected	10.1016/j.crvi.2010.06.006	ecological
478	sardinia	location/institutions	vegetation belts	ecosystems/species	undirected	10.1016/j.crvi.2010.06.006	ecological
482	hyblaean territory	location/institutions	conservation status	methods	undirected	WOS:000298268100013	ecological
482	hyblaean territory	location/institutions	endemic plants	ecosystems/species	undirected	WOS:000298268100013	ecological
482	hyblaean territory	location/institutions	habitats	ecosystems/species	undirected	WOS:000298268100013	ecological
482	hyblaean territory	location/institutions	life forms	methods	undirected	WOS:000298268100013	ecological
482	hyblaean territory	location/institutions	sicily	location/institutions	undirected	WOS:000298268100013	ecological
482	sicily	location/institutions	conservation status	methods	undirected	WOS:000298268100013	ecological
482	sicily	location/institutions	endemic plants	ecosystems/species	undirected	WOS:000298268100013	ecological
482	sicily	location/institutions	habitats	ecosystems/species	undirected	WOS:000298268100013	ecological
482	sicily	location/institutions	life forms	methods	undirected	WOS:000298268100013	ecological
484	po plain	location/institutions	acidic dry grasslands	ecosystems/species	undirected	10.1080/11263504.2012.717547	ecological
484	po plain	location/institutions	dynamics	management	undirected	10.1080/11263504.2012.717547	ecological
484	po plain	location/institutions	phytosociology	methods	undirected	10.1080/11263504.2012.717547	ecological
484	po plain	location/institutions	threats	methods	undirected	10.1080/11263504.2012.717547	ecological
486	portugal	location/institutions	ephemeral vegetation	ecosystems/species	undirected	10.1007/s10750-009-9885-7	ecological
486	portugal	location/institutions	pond typology	methods	undirected	10.1007/s10750-009-9885-7	ecological
486	portugal	location/institutions	temporary ponds	ecosystems/species	undirected	10.1007/s10750-009-9885-7	ecological
487	preslavska mountain	location/institutions	endemicity	methods	undirected	WOS:000296401700009	ecological
487	preslavska mountain	location/institutions	protected plants	ecosystems/species	undirected	WOS:000296401700009	ecological
487	preslavska mountain	location/institutions	relicts	ecosystems/species	undirected	WOS:000296401700009	ecological
489	romania	location/institutions	conservation	management	undirected	10.1016/j.actao.2008.08.002	ecological
489	romania	location/institutions	population size	methods	undirected	10.1016/j.actao.2008.08.002	ecological
489	romania	location/institutions	rana dalmatina	ecosystems/species	undirected	10.1016/j.actao.2008.08.002	ecological
489	romania	location/institutions	rural landscapes	methods	undirected	10.1016/j.actao.2008.08.002	ecological
491	italy	location/institutions	fish species	ecosystems/species	undirected	10.1016/j.ecss.2011.08.021	ecological
491	italy	location/institutions	gobies	ecosystems/species	undirected	10.1016/j.ecss.2011.08.021	ecological
491	italy	location/institutions	habitats directive	management	undirected	10.1016/j.ecss.2011.08.021	ecological
491	italy	location/institutions	marshland	ecosystems/species	undirected	10.1016/j.ecss.2011.08.021	ecological
491	italy	location/institutions	population status	methods	undirected	10.1016/j.ecss.2011.08.021	ecological
491	italy	location/institutions	venice lagoon	location/institutions	undirected	10.1016/j.ecss.2011.08.021	ecological
491	venice lagoon	location/institutions	fish species	ecosystems/species	undirected	10.1016/j.ecss.2011.08.021	ecological
491	venice lagoon	location/institutions	gobies	ecosystems/species	undirected	10.1016/j.ecss.2011.08.021	ecological
491	venice lagoon	location/institutions	habitats directive	management	undirected	10.1016/j.ecss.2011.08.021	ecological
491	venice lagoon	location/institutions	marshland	ecosystems/species	undirected	10.1016/j.ecss.2011.08.021	ecological
491	venice lagoon	location/institutions	population status	methods	undirected	10.1016/j.ecss.2011.08.021	ecological
497	iberian	location/institutions	copris	ecosystems/species	undirected	10.1016/j.biocon.2004.08.005	ecological
497	iberian	location/institutions	dung beetle conservation	management	undirected	10.1016/j.biocon.2004.08.005	ecological
497	iberian	location/institutions	gis predictive niche-modelling	methods	undirected	10.1016/j.biocon.2004.08.005	ecological
497	iberian	location/institutions	sdm	methods	undirected	10.1016/j.biocon.2004.08.005	ecological
498	grampian highlands	location/institutions	arctic-alpine plants	ecosystems/species	undirected	10.1016/j.biocon.2008.04.008	ecological
498	grampian highlands	location/institutions	classification tree	methods	undirected	10.1016/j.biocon.2008.04.008	ecological
498	grampian highlands	location/institutions	mountains	location/institutions	undirected	10.1016/j.biocon.2008.04.008	ecological
498	grampian highlands	location/institutions	natura 2000	management	undirected	10.1016/j.biocon.2008.04.008	ecological
498	grampian highlands	location/institutions	sci	management	undirected	10.1016/j.biocon.2008.04.008	ecological
498	grampian highlands	location/institutions	sdm	methods	undirected	10.1016/j.biocon.2008.04.008	ecological
498	grampian highlands	location/institutions	topography	methods	undirected	10.1016/j.biocon.2008.04.008	ecological
498	mountains	location/institutions	arctic-alpine plants	ecosystems/species	undirected	10.1016/j.biocon.2008.04.008	ecological
498	mountains	location/institutions	classification tree	methods	undirected	10.1016/j.biocon.2008.04.008	ecological
498	mountains	location/institutions	natura 2000	management	undirected	10.1016/j.biocon.2008.04.008	ecological
498	mountains	location/institutions	sci	management	undirected	10.1016/j.biocon.2008.04.008	ecological
498	mountains	location/institutions	sdm	methods	undirected	10.1016/j.biocon.2008.04.008	ecological
498	mountains	location/institutions	topography	methods	undirected	10.1016/j.biocon.2008.04.008	ecological
499	iberian	location/institutions	biomod	methods	undirected	10.1007/s10531-010-9865-2	ecological
499	iberian	location/institutions	climate change	methods	undirected	10.1007/s10531-010-9865-2	ecological
499	iberian	location/institutions	extinction risk	methods	undirected	10.1007/s10531-010-9865-2	ecological
499	iberian	location/institutions	lacerta schreiberi	ecosystems/species	undirected	10.1007/s10531-010-9865-2	ecological
499	iberian	location/institutions	peninsula	location/institutions	undirected	10.1007/s10531-010-9865-2	ecological
499	iberian	location/institutions	sdm	methods	undirected	10.1007/s10531-010-9865-2	ecological
499	peninsula	location/institutions	biomod	methods	undirected	10.1007/s10531-010-9865-2	ecological
499	peninsula	location/institutions	climate change	methods	undirected	10.1007/s10531-010-9865-2	ecological
499	peninsula	location/institutions	extinction risk	methods	undirected	10.1007/s10531-010-9865-2	ecological
499	peninsula	location/institutions	lacerta schreiberi	ecosystems/species	undirected	10.1007/s10531-010-9865-2	ecological
499	peninsula	location/institutions	sdm	methods	undirected	10.1007/s10531-010-9865-2	ecological
500	cee	location/institutions	forest habitats	ecosystems/species	undirected	10.1016/j.ecolind.2013.10.010	ecological
500	cee	location/institutions	habitats	ecosystems/species	undirected	10.1016/j.ecolind.2013.10.010	ecological
500	cee	location/institutions	habitats directive	management	undirected	10.1016/j.ecolind.2013.10.010	ecological
500	cee	location/institutions	indicator species	methods	undirected	10.1016/j.ecolind.2013.10.010	ecological
500	cee	location/institutions	natura 2000	management	undirected	10.1016/j.ecolind.2013.10.010	ecological
500	cee	location/institutions	occurrence probability	methods	undirected	10.1016/j.ecolind.2013.10.010	ecological
500	cee	location/institutions	sdm	methods	undirected	10.1016/j.ecolind.2013.10.010	ecological
500	cee	location/institutions	spatial conservation planning	methods	undirected	10.1016/j.ecolind.2013.10.010	ecological
502	iberian	location/institutions	chestnut	ecosystems/species	undirected	10.1016/j.foreco.2011.02.023	ecological
502	iberian	location/institutions	image texture	methods	undirected	10.1016/j.foreco.2011.02.023	ecological
502	iberian	location/institutions	landscape metrics	methods	undirected	10.1016/j.foreco.2011.02.023	ecological
502	iberian	location/institutions	terrain features	methods	undirected	10.1016/j.foreco.2011.02.023	ecological
505	maerl	location/institutions	dredging	management	undirected	10.1002/aqc.568	ecological
505	maerl	location/institutions	eutrophication	methods	undirected	10.1002/aqc.568	ecological
505	maerl	location/institutions	extraction	management	undirected	10.1002/aqc.568	ecological
505	maerl	location/institutions	invasive species	ecosystems/species	undirected	10.1002/aqc.568	ecological
505	maerl	location/institutions	natura 2000	management	undirected	10.1002/aqc.568	ecological
505	maerl	location/institutions	uk	location/institutions	undirected	10.1002/aqc.568	ecological
505	uk	location/institutions	dredging	management	undirected	10.1002/aqc.568	ecological
505	uk	location/institutions	eutrophication	methods	undirected	10.1002/aqc.568	ecological
505	uk	location/institutions	extraction	management	undirected	10.1002/aqc.568	ecological
505	uk	location/institutions	invasive species	ecosystems/species	undirected	10.1002/aqc.568	ecological
505	uk	location/institutions	natura 2000	management	undirected	10.1002/aqc.568	ecological
506	baltic sea	location/institutions	macroalgae	ecosystems/species	undirected	10.1023/a:1020095220957	ecological
506	baltic sea	location/institutions	monitoring	methods	undirected	10.1023/a:1020095220957	ecological
506	baltic sea	location/institutions	phytobenthos	ecosystems/species	undirected	10.1023/a:1020095220957	ecological
514	manx shearwater	location/institutions	kernel analysis	methods	undirected	10.1016/j.biocon.2009.03.019	ecological
514	manx shearwater	location/institutions	rafting behaviour	methods	undirected	10.1016/j.biocon.2009.03.019	ecological
514	manx shearwater	location/institutions	spa	management	undirected	10.1016/j.biocon.2009.03.019	ecological
515	azores	location/institutions	complementarity	methods	undirected	10.1007/s10531-004-4283-y	ecological
515	azores	location/institutions	endemic arthropods	ecosystems/species	undirected	10.1007/s10531-004-4283-y	ecological
515	azores	location/institutions	heuristic and optimal solutions	methods	undirected	10.1007/s10531-004-4283-y	ecological
515	azores	location/institutions	multiple-criteria index	methods	undirected	10.1007/s10531-004-4283-y	ecological
515	azores	location/institutions	natura 2000	management	undirected	10.1007/s10531-004-4283-y	ecological
515	azores	location/institutions	partial regression	methods	undirected	10.1007/s10531-004-4283-y	ecological
516	spain	location/institutions	flora	ecosystems/species	undirected	10.1016/s0006-3207(03)00128-9	ecological
516	spain	location/institutions	legislation	management	undirected	10.1016/s0006-3207(03)00128-9	ecological
516	spain	location/institutions	plant conservation	methods	undirected	10.1016/s0006-3207(03)00128-9	ecological
516	spain	location/institutions	recovery plans	management	undirected	10.1016/s0006-3207(03)00128-9	ecological
517	sila national park	location/institutions	natura 2000	management	undirected	10.1080/11250003.2010.485210	ecological
517	sila national park	location/institutions	nature conservation	management	undirected	10.1080/11250003.2010.485210	ecological
517	sila national park	location/institutions	saproxylic predator	ecosystems/species	undirected	10.1080/11250003.2010.485210	ecological
517	sila national park	location/institutions	umbrella species	methods	undirected	10.1080/11250003.2010.485210	ecological
519	spain	location/institutions	hierarchical partitioning	methods	undirected	10.1007/s10021-007-9020-4	ecological
519	spain	location/institutions	land cover classification	methods	undirected	10.1007/s10021-007-9020-4	ecological
519	spain	location/institutions	land use change	methods	undirected	10.1007/s10021-007-9020-4	ecological
519	spain	location/institutions	regression modelling	methods	undirected	10.1007/s10021-007-9020-4	ecological
520	ground water	location/institutions	aquatic vegetation	ecosystems/species	undirected	10.1016/j.ecoleng.2013.04.028	ecological
520	ground water	location/institutions	gis	methods	undirected	10.1016/j.ecoleng.2013.04.028	ecological
520	ground water	location/institutions	modelling	methods	undirected	10.1016/j.ecoleng.2013.04.028	ecological
520	ground water	location/institutions	poland	location/institutions	undirected	10.1016/j.ecoleng.2013.04.028	ecological
520	ground water	location/institutions	regeneration	methods	undirected	10.1016/j.ecoleng.2013.04.028	ecological
520	poland	location/institutions	aquatic vegetation	ecosystems/species	undirected	10.1016/j.ecoleng.2013.04.028	ecological
520	poland	location/institutions	gis	methods	undirected	10.1016/j.ecoleng.2013.04.028	ecological
520	poland	location/institutions	modelling	methods	undirected	10.1016/j.ecoleng.2013.04.028	ecological
520	poland	location/institutions	regeneration	methods	undirected	10.1016/j.ecoleng.2013.04.028	ecological
522	eu	location/institutions	baccharis halimifolia	ecosystems/species	undirected	10.1007/s10530-012-0360-4	ecological
522	eu	location/institutions	estuarine communities	ecosystems/species	undirected	10.1007/s10530-012-0360-4	ecological
522	eu	location/institutions	habitat vulnerability	methods	undirected	10.1007/s10530-012-0360-4	ecological
522	eu	location/institutions	habitats	ecosystems/species	undirected	10.1007/s10530-012-0360-4	ecological
522	eu	location/institutions	naturalization chronology	methods	undirected	10.1007/s10530-012-0360-4	ecological
522	eu	location/institutions	spain	location/institutions	undirected	10.1007/s10530-012-0360-4	ecological
522	spain	location/institutions	baccharis halimifolia	ecosystems/species	undirected	10.1007/s10530-012-0360-4	ecological
522	spain	location/institutions	estuarine communities	ecosystems/species	undirected	10.1007/s10530-012-0360-4	ecological
522	spain	location/institutions	habitat vulnerability	methods	undirected	10.1007/s10530-012-0360-4	ecological
522	spain	location/institutions	habitats	ecosystems/species	undirected	10.1007/s10530-012-0360-4	ecological
522	spain	location/institutions	naturalization chronology	methods	undirected	10.1007/s10530-012-0360-4	ecological
525	bulgaria	location/institutions	conservation	management	undirected	10.4404/hystrix-23.2-4779	ecological
525	bulgaria	location/institutions	distribution	methods	undirected	10.4404/hystrix-23.2-4779	ecological
525	bulgaria	location/institutions	myomimus roachi	ecosystems/species	undirected	10.4404/hystrix-23.2-4779	ecological
525	bulgaria	location/institutions	roach's mouse-tailed dormouse	ecosystems/species	undirected	10.4404/hystrix-23.2-4779	ecological
528	flanders	location/institutions	flood prevention	management	undirected	10.1080/09640568.2012.724014	ecological
528	flanders	location/institutions	natura 2000	management	undirected	10.1080/09640568.2012.724014	ecological
528	flanders	location/institutions	project design	methods	undirected	10.1080/09640568.2012.724014	ecological
528	flanders	location/institutions	project implementation	management	undirected	10.1080/09640568.2012.724014	ecological
530	isle of rum	location/institutions	conservation management	management	undirected	10.1016/s0006-3207(99)00160-3	ecological
530	isle of rum	location/institutions	habitats directive	management	undirected	10.1016/s0006-3207(99)00160-3	ecological
530	isle of rum	location/institutions	red deer	ecosystems/species	undirected	10.1016/s0006-3207(99)00160-3	ecological
530	isle of rum	location/institutions	restoration	management	undirected	10.1016/s0006-3207(99)00160-3	ecological
531	spain	location/institutions	asplenietea	ecosystems/species	undirected	WOS:000179937900008	ecological
531	spain	location/institutions	endemic taxa	ecosystems/species	undirected	WOS:000179937900008	ecological
531	spain	location/institutions	habitats directive	management	undirected	WOS:000179937900008	ecological
531	spain	location/institutions	rupicolous chasmophyte	ecosystems/species	undirected	WOS:000179937900008	ecological
537	basque country	location/institutions	co-management	management	undirected	WOS:000311829900004	social and policies
537	basque country	location/institutions	natura 2000	management	undirected	WOS:000311829900004	social and policies
537	basque country	location/institutions	success	methods	undirected	WOS:000311829900004	social and policies
538	atlantic	location/institutions	cetaceans	ecosystems/species	undirected	10.1017/s0025315412001397	ecological
538	atlantic	location/institutions	habitat selection	methods	undirected	10.1017/s0025315412001397	ecological
538	atlantic	location/institutions	seal	ecosystems/species	undirected	10.1017/s0025315412001397	ecological
542	mediterranean basin	location/institutions	animal-plant interactions	methods	undirected	10.1016/j.jnc.2009.11.003	ecological
542	mediterranean basin	location/institutions	habitats directive	management	undirected	10.1016/j.jnc.2009.11.003	ecological
542	mediterranean basin	location/institutions	land use change	methods	undirected	10.1016/j.jnc.2009.11.003	ecological
542	mediterranean basin	location/institutions	microbial community	ecosystems/species	undirected	10.1016/j.jnc.2009.11.003	ecological
542	mediterranean basin	location/institutions	plant diversity	methods	undirected	10.1016/j.jnc.2009.11.003	ecological
542	mediterranean basin	location/institutions	poetea bulbosae	ecosystems/species	undirected	10.1016/j.jnc.2009.11.003	ecological
542	mediterranean basin	location/institutions	soil fertility	methods	undirected	10.1016/j.jnc.2009.11.003	ecological
550	rock pools	location/institutions	flood prevention	management	undirected	10.1080/11263500903187068	ecological
550	rock pools	location/institutions	plant communities	ecosystems/species	undirected	10.1080/11263500903187068	ecological
550	rock pools	location/institutions	small-scale zonation	methods	undirected	10.1080/11263500903187068	ecological
550	rock pools	location/institutions	temporary ponds	ecosystems/species	undirected	10.1080/11263500903187068	ecological
550	rock pools	location/institutions	water depth	methods	undirected	10.1080/11263500903187068	ecological
551	romania	location/institutions	birds directive	management	undirected	WOS:000314137200005	ecological
551	romania	location/institutions	conservation tools	methods	undirected	WOS:000314137200005	ecological
551	romania	location/institutions	forest birds	ecosystems/species	undirected	WOS:000314137200005	ecological
551	romania	location/institutions	gap analysis	methods	undirected	WOS:000314137200005	ecological
551	romania	location/institutions	gis	methods	undirected	WOS:000314137200005	ecological
551	romania	location/institutions	habitat suitability	methods	undirected	WOS:000314137200005	ecological
551	romania	location/institutions	predictive modelling	methods	undirected	WOS:000314137200005	ecological
551	romania	location/institutions	spa	management	undirected	WOS:000314137200005	ecological
552	islands	location/institutions	aquatic vegetation	ecosystems/species	undirected	10.1556/ComEc.10.2009.2.4	ecological
552	islands	location/institutions	habitats	ecosystems/species	undirected	10.1556/ComEc.10.2009.2.4	ecological
552	islands	location/institutions	matrix	methods	undirected	10.1556/ComEc.10.2009.2.4	ecological
552	islands	location/institutions	species richness	methods	undirected	10.1556/ComEc.10.2009.2.4	ecological
552	islands	location/institutions	transylvania	location/institutions	undirected	10.1556/ComEc.10.2009.2.4	ecological
552	transylvania	location/institutions	aquatic vegetation	ecosystems/species	undirected	10.1556/ComEc.10.2009.2.4	ecological
552	transylvania	location/institutions	habitats	ecosystems/species	undirected	10.1556/ComEc.10.2009.2.4	ecological
552	transylvania	location/institutions	matrix	methods	undirected	10.1556/ComEc.10.2009.2.4	ecological
552	transylvania	location/institutions	species richness	methods	undirected	10.1556/ComEc.10.2009.2.4	ecological
561	boisoara	location/institutions	beech forests	ecosystems/species	undirected	WOS:000321597300016	ecological
561	boisoara	location/institutions	fagaras	location/institutions	undirected	WOS:000321597300016	ecological
561	boisoara	location/institutions	integrated forest management	management	undirected	WOS:000321597300016	ecological
561	boisoara	location/institutions	natura 2000	management	undirected	WOS:000321597300016	ecological
561	boisoara	location/institutions	picea	ecosystems/species	undirected	WOS:000321597300016	ecological
561	boisoara	location/institutions	romania	location/institutions	undirected	WOS:000321597300016	ecological
561	fagaras	location/institutions	beech forests	ecosystems/species	undirected	WOS:000321597300016	ecological
561	fagaras	location/institutions	integrated forest management	management	undirected	WOS:000321597300016	ecological
561	fagaras	location/institutions	natura 2000	management	undirected	WOS:000321597300016	ecological
561	fagaras	location/institutions	picea	ecosystems/species	undirected	WOS:000321597300016	ecological
561	fagaras	location/institutions	romania	location/institutions	undirected	WOS:000321597300016	ecological
561	romania	location/institutions	beech forests	ecosystems/species	undirected	WOS:000321597300016	ecological
561	romania	location/institutions	integrated forest management	management	undirected	WOS:000321597300016	ecological
561	romania	location/institutions	natura 2000	management	undirected	WOS:000321597300016	ecological
561	romania	location/institutions	picea	ecosystems/species	undirected	WOS:000321597300016	ecological
562	eu	location/institutions	biodiversity indicators	methods	undirected	10.1016/j.biocon.2012.06.016	social and policies
562	eu	location/institutions	conservation status	methods	undirected	10.1016/j.biocon.2012.06.016	social and policies
562	eu	location/institutions	ecosystem services	methods	undirected	10.1016/j.biocon.2012.06.016	social and policies
562	eu	location/institutions	habitats directive	management	undirected	10.1016/j.biocon.2012.06.016	social and policies
562	eu	location/institutions	spatial analysis	methods	undirected	10.1016/j.biocon.2012.06.016	social and policies
563	netherlands	location/institutions	connectivity	methods	undirected	10.1007/s10980-008-9274-z	ecological
563	netherlands	location/institutions	dispersal capacity	methods	undirected	10.1007/s10980-008-9274-z	ecological
563	netherlands	location/institutions	ecological networks	management	undirected	10.1007/s10980-008-9274-z	ecological
563	netherlands	location/institutions	forest habitats	ecosystems/species	undirected	10.1007/s10980-008-9274-z	ecological
563	netherlands	location/institutions	habitat area requirements	methods	undirected	10.1007/s10980-008-9274-z	ecological
563	netherlands	location/institutions	habitat selection	methods	undirected	10.1007/s10980-008-9274-z	ecological
563	netherlands	location/institutions	landscape planning	methods	undirected	10.1007/s10980-008-9274-z	ecological
563	netherlands	location/institutions	regression modelling	methods	undirected	10.1007/s10980-008-9274-z	ecological
563	netherlands	location/institutions	sdm	methods	undirected	10.1007/s10980-008-9274-z	ecological
565	mediteraneean sea	location/institutions	agriolimacidae	ecosystems/species	undirected	10.3897/zookeys.174.2474	ecological
565	mediteraneean sea	location/institutions	distribution	methods	undirected	10.3897/zookeys.174.2474	ecological
565	mediteraneean sea	location/institutions	limacidae	ecosystems/species	undirected	10.3897/zookeys.174.2474	ecological
565	mediteraneean sea	location/institutions	milacidae	ecosystems/species	undirected	10.3897/zookeys.174.2474	ecological
566	coastal waters	location/institutions	cost-effectiveness	methods	undirected	10.1016/j.ecss.2007.12.006	ecological
566	coastal waters	location/institutions	habitats directive	management	undirected	10.1016/j.ecss.2007.12.006	ecological
566	coastal waters	location/institutions	macroalgae	ecosystems/species	undirected	10.1016/j.ecss.2007.12.006	ecological
566	coastal waters	location/institutions	monitoring	methods	undirected	10.1016/j.ecss.2007.12.006	ecological
566	coastal waters	location/institutions	multivariate analysis	methods	undirected	10.1016/j.ecss.2007.12.006	ecological
566	coastal waters	location/institutions	spain	location/institutions	undirected	10.1016/j.ecss.2007.12.006	ecological
566	coastal waters	location/institutions	taxonomic resolution	methods	undirected	10.1016/j.ecss.2007.12.006	ecological
566	coastal waters	location/institutions	transformation	management	undirected	10.1016/j.ecss.2007.12.006	ecological
566	coastal waters	location/institutions	wfd	management	undirected	10.1016/j.ecss.2007.12.006	ecological
566	spain	location/institutions	cost-effectiveness	methods	undirected	10.1016/j.ecss.2007.12.006	ecological
566	spain	location/institutions	habitats directive	management	undirected	10.1016/j.ecss.2007.12.006	ecological
566	spain	location/institutions	macroalgae	ecosystems/species	undirected	10.1016/j.ecss.2007.12.006	ecological
566	spain	location/institutions	monitoring	methods	undirected	10.1016/j.ecss.2007.12.006	ecological
566	spain	location/institutions	multivariate analysis	methods	undirected	10.1016/j.ecss.2007.12.006	ecological
566	spain	location/institutions	taxonomic resolution	methods	undirected	10.1016/j.ecss.2007.12.006	ecological
566	spain	location/institutions	transformation	management	undirected	10.1016/j.ecss.2007.12.006	ecological
566	spain	location/institutions	wfd	management	undirected	10.1016/j.ecss.2007.12.006	ecological
570	lagoon	location/institutions	conservation management	management	undirected	10.1002/ece3.585	ecological
570	lagoon	location/institutions	habitats directive	management	undirected	10.1002/ece3.585	ecological
570	lagoon	location/institutions	indicator	methods	undirected	10.1002/ece3.585	ecological
570	lagoon	location/institutions	sustainability	management	undirected	10.1002/ece3.585	ecological
570	lagoon	location/institutions	wfd	management	undirected	10.1002/ece3.585	ecological
571	eu	location/institutions	lidar	methods	undirected	10.1007/s10531-013-0442-3	ecological
571	eu	location/institutions	local scale	methods	undirected	10.1007/s10531-013-0442-3	ecological
571	eu	location/institutions	natura 2000	management	undirected	10.1007/s10531-013-0442-3	ecological
571	eu	location/institutions	solar radiation	methods	undirected	10.1007/s10531-013-0442-3	ecological
571	eu	location/institutions	topographic wetness index (twi)	methods	undirected	10.1007/s10531-013-0442-3	ecological
571	eu	location/institutions	vegetation	ecosystems/species	undirected	10.1007/s10531-013-0442-3	ecological
571	eu	location/institutions	wind	methods	undirected	10.1007/s10531-013-0442-3	ecological
573	estuary	location/institutions	benthos	ecosystems/species	undirected	10.1017/s0025315409003105	ecological
573	estuary	location/institutions	macrofauna	ecosystems/species	undirected	10.1017/s0025315409003105	ecological
573	estuary	location/institutions	soft bottoms	location/institutions	undirected	10.1017/s0025315409003105	ecological
573	estuary	location/institutions	trophic structure	methods	undirected	10.1017/s0025315409003105	ecological
573	soft bottoms	location/institutions	benthos	ecosystems/species	undirected	10.1017/s0025315409003105	ecological
573	soft bottoms	location/institutions	macrofauna	ecosystems/species	undirected	10.1017/s0025315409003105	ecological
573	soft bottoms	location/institutions	trophic structure	methods	undirected	10.1017/s0025315409003105	ecological
574	karst	location/institutions	birds	ecosystems/species	undirected	10.1016/j.biocon.2006.06.019	ecological
574	karst	location/institutions	hydrology	methods	undirected	10.1016/j.biocon.2006.06.019	ecological
574	karst	location/institutions	invertebrates	ecosystems/species	undirected	10.1016/j.biocon.2006.06.019	ecological
574	karst	location/institutions	land use	methods	undirected	10.1016/j.biocon.2006.06.019	ecological
574	karst	location/institutions	review	methods	undirected	10.1016/j.biocon.2006.06.019	ecological
574	karst	location/institutions	turloughs	ecosystems/species	undirected	10.1016/j.biocon.2006.06.019	ecological
574	karst	location/institutions	vegetation	ecosystems/species	undirected	10.1016/j.biocon.2006.06.019	ecological
574	karst	location/institutions	wetlands	ecosystems/species	undirected	10.1016/j.biocon.2006.06.019	ecological
575	ireland	location/institutions	biodiversity	management	undirected	WOS:000253068600005	ecological
575	ireland	location/institutions	grazing	management	undirected	WOS:000253068600005	ecological
575	ireland	location/institutions	management	management	undirected	WOS:000253068600005	ecological
575	ireland	location/institutions	seasonal flooding	management	undirected	WOS:000253068600005	ecological
575	ireland	location/institutions	turloughs	ecosystems/species	undirected	WOS:000253068600005	ecological
575	ireland	location/institutions	wetlands	ecosystems/species	undirected	WOS:000253068600005	ecological
576	lake ijsselmeer	location/institutions	directives	management	undirected	10.1007/s10980-006-6587-7	ecological
576	lake ijsselmeer	location/institutions	hsi-model	methods	undirected	10.1007/s10980-006-6587-7	ecological
576	lake ijsselmeer	location/institutions	monte carlo simulation	methods	undirected	10.1007/s10980-006-6587-7	ecological
576	lake ijsselmeer	location/institutions	netherlands	location/institutions	undirected	10.1007/s10980-006-6587-7	ecological
576	lake ijsselmeer	location/institutions	pondweed	ecosystems/species	undirected	10.1007/s10980-006-6587-7	ecological
576	lake ijsselmeer	location/institutions	uncertainty	methods	undirected	10.1007/s10980-006-6587-7	ecological
576	lake ijsselmeer	location/institutions	water management	management	undirected	10.1007/s10980-006-6587-7	ecological
576	netherlands	location/institutions	directives	management	undirected	10.1007/s10980-006-6587-7	ecological
576	netherlands	location/institutions	hsi-model	methods	undirected	10.1007/s10980-006-6587-7	ecological
576	netherlands	location/institutions	monte carlo simulation	methods	undirected	10.1007/s10980-006-6587-7	ecological
576	netherlands	location/institutions	pondweed	ecosystems/species	undirected	10.1007/s10980-006-6587-7	ecological
576	netherlands	location/institutions	uncertainty	methods	undirected	10.1007/s10980-006-6587-7	ecological
576	netherlands	location/institutions	water management	management	undirected	10.1007/s10980-006-6587-7	ecological
577	mediterranean basin	location/institutions	cca	methods	undirected	10.1016/j.jenvman.2010.11.032	ecological
577	mediterranean basin	location/institutions	enhanced transition matrix	methods	undirected	10.1016/j.jenvman.2010.11.032	ecological
577	mediterranean basin	location/institutions	gain	management	undirected	10.1016/j.jenvman.2010.11.032	ecological
577	mediterranean basin	location/institutions	land cover change	methods	undirected	10.1016/j.jenvman.2010.11.032	ecological
577	mediterranean basin	location/institutions	loss	management	undirected	10.1016/j.jenvman.2010.11.032	ecological
577	mediterranean basin	location/institutions	net	location/institutions	undirected	10.1016/j.jenvman.2010.11.032	ecological
577	mediterranean basin	location/institutions	spa	management	undirected	10.1016/j.jenvman.2010.11.032	ecological
577	mediterranean basin	location/institutions	spain	location/institutions	undirected	10.1016/j.jenvman.2010.11.032	ecological
577	mediterranean basin	location/institutions	swap	methods	undirected	10.1016/j.jenvman.2010.11.032	ecological
577	net	location/institutions	cca	methods	undirected	10.1016/j.jenvman.2010.11.032	ecological
577	net	location/institutions	enhanced transition matrix	methods	undirected	10.1016/j.jenvman.2010.11.032	ecological
577	net	location/institutions	gain	management	undirected	10.1016/j.jenvman.2010.11.032	ecological
577	net	location/institutions	land cover change	methods	undirected	10.1016/j.jenvman.2010.11.032	ecological
577	net	location/institutions	loss	management	undirected	10.1016/j.jenvman.2010.11.032	ecological
577	net	location/institutions	spa	management	undirected	10.1016/j.jenvman.2010.11.032	ecological
577	net	location/institutions	spain	location/institutions	undirected	10.1016/j.jenvman.2010.11.032	ecological
577	net	location/institutions	swap	methods	undirected	10.1016/j.jenvman.2010.11.032	ecological
577	spain	location/institutions	cca	methods	undirected	10.1016/j.jenvman.2010.11.032	ecological
577	spain	location/institutions	enhanced transition matrix	methods	undirected	10.1016/j.jenvman.2010.11.032	ecological
577	spain	location/institutions	gain	management	undirected	10.1016/j.jenvman.2010.11.032	ecological
577	spain	location/institutions	land cover change	methods	undirected	10.1016/j.jenvman.2010.11.032	ecological
577	spain	location/institutions	loss	management	undirected	10.1016/j.jenvman.2010.11.032	ecological
577	spain	location/institutions	spa	management	undirected	10.1016/j.jenvman.2010.11.032	ecological
577	spain	location/institutions	swap	methods	undirected	10.1016/j.jenvman.2010.11.032	ecological
578	mediterranean	location/institutions	oak	ecosystems/species	undirected	10.1111/j.1523-1739.2012.01869.x	ecological
578	mediterranean	location/institutions	plants	ecosystems/species	undirected	10.1111/j.1523-1739.2012.01869.x	ecological
578	mediterranean	location/institutions	predictive modelling	methods	undirected	10.1111/j.1523-1739.2012.01869.x	ecological
578	mediterranean	location/institutions	remote sensing	methods	undirected	10.1111/j.1523-1739.2012.01869.x	ecological
580	thames estuary	location/institutions	aerial survey	methods	undirected	10.1016/j.biocon.2011.12.033	ecological
580	thames estuary	location/institutions	distance sampling	methods	undirected	10.1016/j.biocon.2011.12.033	ecological
580	thames estuary	location/institutions	gavia stellata	ecosystems/species	undirected	10.1016/j.biocon.2011.12.033	ecological
580	thames estuary	location/institutions	natura 2000	management	undirected	10.1016/j.biocon.2011.12.033	ecological
580	thames estuary	location/institutions	outer	methods	undirected	10.1016/j.biocon.2011.12.033	ecological
581	baltic sea	location/institutions	aerial photography	methods	undirected	10.1002/aqc.553	ecological
581	baltic sea	location/institutions	coastal	location/institutions	undirected	10.1002/aqc.553	ecological
581	baltic sea	location/institutions	eu	location/institutions	undirected	10.1002/aqc.553	ecological
581	baltic sea	location/institutions	habitats directive	management	undirected	10.1002/aqc.553	ecological
581	coastal	location/institutions	aerial photography	methods	undirected	10.1002/aqc.553	ecological
581	coastal	location/institutions	eu	location/institutions	undirected	10.1002/aqc.553	ecological
581	coastal	location/institutions	habitats directive	management	undirected	10.1002/aqc.553	ecological
581	eu	location/institutions	aerial photography	methods	undirected	10.1002/aqc.553	ecological
581	eu	location/institutions	habitats directive	management	undirected	10.1002/aqc.553	ecological
584	scotland	location/institutions	gams	methods	undirected	10.1016/j.biocon.2009.09.005	ecological
584	scotland	location/institutions	habitats directive	management	undirected	10.1016/j.biocon.2009.09.005	ecological
584	scotland	location/institutions	phocoena phocoena	ecosystems/species	undirected	10.1016/j.biocon.2009.09.005	ecological
584	scotland	location/institutions	predictive modelling	methods	undirected	10.1016/j.biocon.2009.09.005	ecological
584	scotland	location/institutions	relative density	methods	undirected	10.1016/j.biocon.2009.09.005	ecological
584	scotland	location/institutions	species-habitat relationships	methods	undirected	10.1016/j.biocon.2009.09.005	ecological
587	river rhine	location/institutions	biodiversity	management	undirected	10.1016/j.eiar.2006.06.001	ecological
587	river rhine	location/institutions	birds	ecosystems/species	undirected	10.1016/j.eiar.2006.06.001	ecological
587	river rhine	location/institutions	directives	management	undirected	10.1016/j.eiar.2006.06.001	ecological
587	river rhine	location/institutions	eia	methods	undirected	10.1016/j.eiar.2006.06.001	ecological
587	river rhine	location/institutions	flood prevention	management	undirected	10.1016/j.eiar.2006.06.001	ecological
587	river rhine	location/institutions	habitats directive	management	undirected	10.1016/j.eiar.2006.06.001	ecological
587	river rhine	location/institutions	sea	methods	undirected	10.1016/j.eiar.2006.06.001	ecological
589	basque country	location/institutions	biodiversity	management	undirected	10.1016/j.jfe.2012.05.002	social and policies
589	basque country	location/institutions	choice experiment	methods	undirected	10.1016/j.jfe.2012.05.002	social and policies
589	basque country	location/institutions	native tree species	ecosystems/species	undirected	10.1016/j.jfe.2012.05.002	social and policies
589	basque country	location/institutions	natura 2000	management	undirected	10.1016/j.jfe.2012.05.002	social and policies
589	basque country	location/institutions	welfare measure	methods	undirected	10.1016/j.jfe.2012.05.002	social and policies
590	carpathians	location/institutions	hay meadow	ecosystems/species	undirected	WOS:000281933600003	ecological
590	carpathians	location/institutions	mesic pasture	ecosystems/species	undirected	WOS:000281933600003	ecological
590	carpathians	location/institutions	vegetation classification	methods	undirected	WOS:000281933600003	ecological
590	carpathians	location/institutions	vegetation diversity	methods	undirected	WOS:000281933600003	ecological
591	azores	location/institutions	endemic plants	ecosystems/species	undirected	10.1023/b:bioc.0000021326.50170.66	ecological
591	azores	location/institutions	natura 2000	management	undirected	10.1023/b:bioc.0000021326.50170.66	ecological
591	azores	location/institutions	nature conservation	management	undirected	10.1023/b:bioc.0000021326.50170.66	ecological
591	azores	location/institutions	vegetation classification	methods	undirected	10.1023/b:bioc.0000021326.50170.66	ecological
591	azores	location/institutions	vegetation mapping	methods	undirected	10.1023/b:bioc.0000021326.50170.66	ecological
592	italy	location/institutions	habitats directive	management	undirected	WOS:000283381700003	ecological
592	italy	location/institutions	phytosociology	methods	undirected	WOS:000283381700003	ecological
592	italy	location/institutions	plant landscape	methods	undirected	WOS:000283381700003	ecological
592	italy	location/institutions	vegetation	ecosystems/species	undirected	WOS:000283381700003	ecological
596	austria	location/institutions	biodiversity conservation	management	undirected	10.1016/s1462-9011(03)00046-7	social and policies
596	austria	location/institutions	compensation	management	undirected	10.1016/s1462-9011(03)00046-7	social and policies
596	austria	location/institutions	forest	ecosystems/species	undirected	10.1016/s1462-9011(03)00046-7	social and policies
596	austria	location/institutions	gene conservation	methods	undirected	10.1016/s1462-9011(03)00046-7	social and policies
596	austria	location/institutions	protected forest areas	ecosystems/species	undirected	10.1016/s1462-9011(03)00046-7	social and policies
598	mediterranean coast	location/institutions	edge-based metrics	methods	undirected	10.1016/j.landurbplan.2013.06.012	ecological
598	mediterranean coast	location/institutions	habitats directive	management	undirected	10.1016/j.landurbplan.2013.06.012	ecological
598	mediterranean coast	location/institutions	landscape changes	methods	undirected	10.1016/j.landurbplan.2013.06.012	ecological
598	mediterranean coast	location/institutions	patch-based metrics	methods	undirected	10.1016/j.landurbplan.2013.06.012	ecological
598	mediterranean coast	location/institutions	transition matrix	methods	undirected	10.1016/j.landurbplan.2013.06.012	ecological
599	continental shelf	location/institutions	english channel	location/institutions	undirected	10.1016/j.ecss.2009.05.018	ecological
599	continental shelf	location/institutions	eu	location/institutions	undirected	10.1016/j.ecss.2009.05.018	ecological
599	continental shelf	location/institutions	habitats	ecosystems/species	undirected	10.1016/j.ecss.2009.05.018	ecological
599	continental shelf	location/institutions	rocks	location/institutions	undirected	10.1016/j.ecss.2009.05.018	ecological
599	continental shelf	location/institutions	seabed mapping	methods	undirected	10.1016/j.ecss.2009.05.018	ecological
599	continental shelf	location/institutions	sediment	location/institutions	undirected	10.1016/j.ecss.2009.05.018	ecological
599	continental shelf	location/institutions	transport	location/institutions	undirected	10.1016/j.ecss.2009.05.018	ecological
599	english channel	location/institutions	eu	location/institutions	undirected	10.1016/j.ecss.2009.05.018	ecological
599	english channel	location/institutions	habitats	ecosystems/species	undirected	10.1016/j.ecss.2009.05.018	ecological
599	english channel	location/institutions	rocks	location/institutions	undirected	10.1016/j.ecss.2009.05.018	ecological
599	english channel	location/institutions	seabed mapping	methods	undirected	10.1016/j.ecss.2009.05.018	ecological
599	english channel	location/institutions	sediment	location/institutions	undirected	10.1016/j.ecss.2009.05.018	ecological
599	english channel	location/institutions	transport	location/institutions	undirected	10.1016/j.ecss.2009.05.018	ecological
599	eu	location/institutions	habitats	ecosystems/species	undirected	10.1016/j.ecss.2009.05.018	ecological
599	eu	location/institutions	rocks	location/institutions	undirected	10.1016/j.ecss.2009.05.018	ecological
599	eu	location/institutions	seabed mapping	methods	undirected	10.1016/j.ecss.2009.05.018	ecological
599	eu	location/institutions	sediment	location/institutions	undirected	10.1016/j.ecss.2009.05.018	ecological
599	eu	location/institutions	transport	location/institutions	undirected	10.1016/j.ecss.2009.05.018	ecological
599	rocks	location/institutions	habitats	ecosystems/species	undirected	10.1016/j.ecss.2009.05.018	ecological
599	rocks	location/institutions	seabed mapping	methods	undirected	10.1016/j.ecss.2009.05.018	ecological
599	rocks	location/institutions	sediment	location/institutions	undirected	10.1016/j.ecss.2009.05.018	ecological
599	rocks	location/institutions	transport	location/institutions	undirected	10.1016/j.ecss.2009.05.018	ecological
599	sediment	location/institutions	habitats	ecosystems/species	undirected	10.1016/j.ecss.2009.05.018	ecological
599	sediment	location/institutions	seabed mapping	methods	undirected	10.1016/j.ecss.2009.05.018	ecological
599	sediment	location/institutions	transport	location/institutions	undirected	10.1016/j.ecss.2009.05.018	ecological
599	transport	location/institutions	habitats	ecosystems/species	undirected	10.1016/j.ecss.2009.05.018	ecological
599	transport	location/institutions	seabed mapping	methods	undirected	10.1016/j.ecss.2009.05.018	ecological
600	eu	location/institutions	monitoring	methods	undirected	10.4404/hystrix-23.1-6364	ecological
600	eu	location/institutions	population monitoring	methods	undirected	10.4404/hystrix-23.1-6364	ecological
600	eu	location/institutions	preventive measures	management	undirected	10.4404/hystrix-23.1-6364	ecological
600	eu	location/institutions	transboundary	management	undirected	10.4404/hystrix-23.1-6364	ecological
601	denmark	location/institutions	habitats directive	management	undirected	WOS:000253741000003	ecological
601	denmark	location/institutions	root development	methods	undirected	WOS:000253741000003	ecological
601	denmark	location/institutions	root scanning	methods	undirected	WOS:000253741000003	ecological
601	denmark	location/institutions	soil nutrient status	methods	undirected	WOS:000253741000003	ecological
2	compensation	management	gold plating	methods	undirected	10.1016/j.landusepol.2010.04.005	social and policies
2	compensation	management	habitats directive	management	undirected	10.1016/j.landusepol.2010.04.005	social and policies
2	compensation	management	port development	management	undirected	10.1016/j.landusepol.2010.04.005	social and policies
2	compensation	management	sustainable development	methods	undirected	10.1016/j.landusepol.2010.04.005	social and policies
2	habitats directive	management	gold plating	methods	undirected	10.1016/j.landusepol.2010.04.005	social and policies
2	habitats directive	management	port development	management	undirected	10.1016/j.landusepol.2010.04.005	social and policies
2	habitats directive	management	sustainable development	methods	undirected	10.1016/j.landusepol.2010.04.005	social and policies
2	port development	management	gold plating	methods	undirected	10.1016/j.landusepol.2010.04.005	social and policies
2	port development	management	sustainable development	methods	undirected	10.1016/j.landusepol.2010.04.005	social and policies
3	habitats directive	management	appropriate assessment	methods	undirected	10.1016/j.eiar.2009.01.001	social and policies
3	habitats directive	management	habitats assessment	methods	undirected	10.1016/j.eiar.2009.01.001	social and policies
3	habitats directive	management	sci	management	undirected	10.1016/j.eiar.2009.01.001	social and policies
3	habitats directive	management	spa	management	undirected	10.1016/j.eiar.2009.01.001	social and policies
3	sci	management	appropriate assessment	methods	undirected	10.1016/j.eiar.2009.01.001	social and policies
3	sci	management	spa	management	undirected	10.1016/j.eiar.2009.01.001	social and policies
3	spa	management	appropriate assessment	methods	undirected	10.1016/j.eiar.2009.01.001	social and policies
4	biodiversity	management	agricultural decline	methods	undirected	WOS:000257896700007	ecological
4	biodiversity	management	landscape metrics	methods	undirected	WOS:000257896700007	ecological
4	natura 2000	management	agricultural decline	methods	undirected	WOS:000257896700007	ecological
4	natura 2000	management	biodiversity	management	undirected	WOS:000257896700007	ecological
4	natura 2000	management	landscape metrics	methods	undirected	WOS:000257896700007	ecological
4	natura 2000	management	protected areas	management	undirected	WOS:000257896700007	ecological
4	protected areas	management	agricultural decline	methods	undirected	WOS:000257896700007	ecological
4	protected areas	management	biodiversity	management	undirected	WOS:000257896700007	ecological
4	protected areas	management	landscape metrics	methods	undirected	WOS:000257896700007	ecological
5	natura 2000	management	enfa	methods	undirected	10.1016/j.biocon.2006.08.003	ecological
5	natura 2000	management	gis	methods	undirected	10.1016/j.biocon.2006.08.003	ecological
5	natura 2000	management	lichens	ecosystems/species	undirected	10.1016/j.biocon.2006.08.003	ecological
5	natura 2000	management	sdm	methods	undirected	10.1016/j.biocon.2006.08.003	ecological
6	ecocentrism	management	habitats	ecosystems/species	undirected	10.3197/096327197776679068	social and policies
6	ecocentrism	management	priorities	methods	undirected	10.3197/096327197776679068	social and policies
6	ecocentrism	management	rights	methods	undirected	10.3197/096327197776679068	social and policies
7	civil society	management	biodiversity policy	management	undirected	10.1016/j.jnc.2011.09.001	social and policies
7	civil society	management	green infrastructure	methods	undirected	10.1016/j.jnc.2011.09.001	social and policies
7	civil society	management	iczm	location/institutions	undirected	10.1016/j.jnc.2011.09.001	social and policies
7	civil society	management	natura 2000	management	undirected	10.1016/j.jnc.2011.09.001	social and policies
7	civil society	management	stakeholder participation	methods	undirected	10.1016/j.jnc.2011.09.001	social and policies
7	biodiversity policy	management	green infrastructure	methods	undirected	10.1016/j.jnc.2011.09.001	social and policies
7	biodiversity policy	management	iczm	location/institutions	undirected	10.1016/j.jnc.2011.09.001	social and policies
7	biodiversity policy	management	natura 2000	management	undirected	10.1016/j.jnc.2011.09.001	social and policies
7	biodiversity policy	management	stakeholder participation	methods	undirected	10.1016/j.jnc.2011.09.001	social and policies
7	natura 2000	management	green infrastructure	methods	undirected	10.1016/j.jnc.2011.09.001	social and policies
8	cbd	management	functional traits	methods	undirected	10.1016/j.biocon.2009.04.022	ecological
8	cbd	management	grazing	management	undirected	10.1016/j.biocon.2009.04.022	ecological
8	cbd	management	landscape	methods	undirected	10.1016/j.biocon.2009.04.022	ecological
8	cbd	management	monitoring	methods	undirected	10.1016/j.biocon.2009.04.022	ecological
8	cbd	management	natura 2000	management	undirected	10.1016/j.biocon.2009.04.022	ecological
8	cbd	management	seminatural grasslands	ecosystems/species	undirected	10.1016/j.biocon.2009.04.022	ecological
8	grazing	management	functional traits	methods	undirected	10.1016/j.biocon.2009.04.022	ecological
8	grazing	management	landscape	methods	undirected	10.1016/j.biocon.2009.04.022	ecological
8	grazing	management	monitoring	methods	undirected	10.1016/j.biocon.2009.04.022	ecological
8	grazing	management	natura 2000	management	undirected	10.1016/j.biocon.2009.04.022	ecological
8	grazing	management	seminatural grasslands	ecosystems/species	undirected	10.1016/j.biocon.2009.04.022	ecological
8	natura 2000	management	functional traits	methods	undirected	10.1016/j.biocon.2009.04.022	ecological
8	natura 2000	management	landscape	methods	undirected	10.1016/j.biocon.2009.04.022	ecological
8	natura 2000	management	monitoring	methods	undirected	10.1016/j.biocon.2009.04.022	ecological
8	natura 2000	management	seminatural grasslands	ecosystems/species	undirected	10.1016/j.biocon.2009.04.022	ecological
9	directives	management	fcs	methods	undirected	10.1016/j.jnc.2011.02.001	social and policies
9	directives	management	management	management	undirected	10.1016/j.jnc.2011.02.001	social and policies
9	directives	management	monitoring	methods	undirected	10.1016/j.jnc.2011.02.001	social and policies
9	directives	management	nature development	management	undirected	10.1016/j.jnc.2011.02.001	social and policies
9	management	management	fcs	methods	undirected	10.1016/j.jnc.2011.02.001	social and policies
9	management	management	monitoring	methods	undirected	10.1016/j.jnc.2011.02.001	social and policies
9	management	management	nature development	management	undirected	10.1016/j.jnc.2011.02.001	social and policies
9	nature development	management	fcs	methods	undirected	10.1016/j.jnc.2011.02.001	social and policies
9	nature development	management	monitoring	methods	undirected	10.1016/j.jnc.2011.02.001	social and policies
10	national parks	management	breeding bird survey	methods	undirected	10.1016/j.biocon.2007.05.021	ecological
10	national parks	management	community dynamics	methods	undirected	10.1016/j.biocon.2007.05.021	ecological
10	national parks	management	detection probability	methods	undirected	10.1016/j.biocon.2007.05.021	ecological
10	national parks	management	natura 2000	management	undirected	10.1016/j.biocon.2007.05.021	ecological
10	national parks	management	nature parks	management	undirected	10.1016/j.biocon.2007.05.021	ecological
10	national parks	management	spa	management	undirected	10.1016/j.biocon.2007.05.021	ecological
10	natura 2000	management	breeding bird survey	methods	undirected	10.1016/j.biocon.2007.05.021	ecological
10	natura 2000	management	community dynamics	methods	undirected	10.1016/j.biocon.2007.05.021	ecological
10	natura 2000	management	detection probability	methods	undirected	10.1016/j.biocon.2007.05.021	ecological
10	natura 2000	management	nature parks	management	undirected	10.1016/j.biocon.2007.05.021	ecological
10	natura 2000	management	spa	management	undirected	10.1016/j.biocon.2007.05.021	ecological
10	nature parks	management	breeding bird survey	methods	undirected	10.1016/j.biocon.2007.05.021	ecological
10	nature parks	management	community dynamics	methods	undirected	10.1016/j.biocon.2007.05.021	ecological
10	nature parks	management	detection probability	methods	undirected	10.1016/j.biocon.2007.05.021	ecological
10	nature parks	management	spa	management	undirected	10.1016/j.biocon.2007.05.021	ecological
10	spa	management	breeding bird survey	methods	undirected	10.1016/j.biocon.2007.05.021	ecological
10	spa	management	community dynamics	methods	undirected	10.1016/j.biocon.2007.05.021	ecological
10	spa	management	detection probability	methods	undirected	10.1016/j.biocon.2007.05.021	ecological
11	burial	management	conservation	management	undirected	10.1093/icesjms/fsl037	ecological
11	burial	management	disturbance	methods	undirected	10.1093/icesjms/fsl037	ecological
11	burial	management	habitats directive	management	undirected	10.1093/icesjms/fsl037	ecological
11	burial	management	shellfishing	management	undirected	10.1093/icesjms/fsl037	ecological
11	burial	management	unregulated harvesting	management	undirected	10.1093/icesjms/fsl037	ecological
11	burial	management	zostera	ecosystems/species	undirected	10.1093/icesjms/fsl037	ecological
11	conservation	management	disturbance	methods	undirected	10.1093/icesjms/fsl037	ecological
11	conservation	management	habitats directive	management	undirected	10.1093/icesjms/fsl037	ecological
11	conservation	management	shellfishing	management	undirected	10.1093/icesjms/fsl037	ecological
11	conservation	management	unregulated harvesting	management	undirected	10.1093/icesjms/fsl037	ecological
11	conservation	management	zostera	ecosystems/species	undirected	10.1093/icesjms/fsl037	ecological
11	habitats directive	management	disturbance	methods	undirected	10.1093/icesjms/fsl037	ecological
11	habitats directive	management	shellfishing	management	undirected	10.1093/icesjms/fsl037	ecological
11	habitats directive	management	unregulated harvesting	management	undirected	10.1093/icesjms/fsl037	ecological
11	habitats directive	management	zostera	ecosystems/species	undirected	10.1093/icesjms/fsl037	ecological
11	shellfishing	management	disturbance	methods	undirected	10.1093/icesjms/fsl037	ecological
11	shellfishing	management	unregulated harvesting	management	undirected	10.1093/icesjms/fsl037	ecological
11	shellfishing	management	zostera	ecosystems/species	undirected	10.1093/icesjms/fsl037	ecological
11	unregulated harvesting	management	disturbance	methods	undirected	10.1093/icesjms/fsl037	ecological
11	unregulated harvesting	management	zostera	ecosystems/species	undirected	10.1093/icesjms/fsl037	ecological
12	biodiversity conservation	management	ecosystem services	methods	undirected	10.1007/s10531-009-9743-y	social and policies
12	biodiversity conservation	management	habitat management	management	undirected	10.1007/s10531-009-9743-y	social and policies
12	biodiversity conservation	management	policy-science interface	methods	undirected	10.1007/s10531-009-9743-y	social and policies
12	habitat management	management	ecosystem services	methods	undirected	10.1007/s10531-009-9743-y	social and policies
12	habitat management	management	policy-science interface	methods	undirected	10.1007/s10531-009-9743-y	social and policies
12	natura 2000	management	biodiversity conservation	management	undirected	10.1007/s10531-009-9743-y	social and policies
12	natura 2000	management	ecosystem services	methods	undirected	10.1007/s10531-009-9743-y	social and policies
12	natura 2000	management	habitat management	management	undirected	10.1007/s10531-009-9743-y	social and policies
12	natura 2000	management	policy-science interface	methods	undirected	10.1007/s10531-009-9743-y	social and policies
12	natura 2000	management	social-ecological systems	management	undirected	10.1007/s10531-009-9743-y	social and policies
12	social-ecological systems	management	biodiversity conservation	management	undirected	10.1007/s10531-009-9743-y	social and policies
12	social-ecological systems	management	ecosystem services	methods	undirected	10.1007/s10531-009-9743-y	social and policies
12	social-ecological systems	management	habitat management	management	undirected	10.1007/s10531-009-9743-y	social and policies
12	social-ecological systems	management	policy-science interface	methods	undirected	10.1007/s10531-009-9743-y	social and policies
13	habitats directive	management	mpa	management	undirected	10.1007/s10750-005-1128-y	ecological
13	habitats directive	management	water quality	methods	undirected	10.1007/s10750-005-1128-y	ecological
13	mpa	management	water quality	methods	undirected	10.1007/s10750-005-1128-y	ecological
14	biodiversity	management	coherence	methods	undirected	10.1002/aqc.827	ecological
14	biodiversity	management	dispersal	methods	undirected	10.1002/aqc.827	ecological
14	biodiversity	management	metapopulation	ecosystems/species	undirected	10.1002/aqc.827	ecological
14	biodiversity	management	spatial scale	methods	undirected	10.1002/aqc.827	ecological
15	natura 2000	management	bioclimatic envelope modelling	methods	undirected	10.1111/j.1461-0248.2011.01610.x	ecological
15	natura 2000	management	climate change	methods	undirected	10.1111/j.1461-0248.2011.01610.x	ecological
15	natura 2000	management	conservation planning	methods	undirected	10.1111/j.1461-0248.2011.01610.x	ecological
15	natura 2000	management	gap analysis	methods	undirected	10.1111/j.1461-0248.2011.01610.x	ecological
15	natura 2000	management	protected areas	management	undirected	10.1111/j.1461-0248.2011.01610.x	ecological
15	protected areas	management	bioclimatic envelope modelling	methods	undirected	10.1111/j.1461-0248.2011.01610.x	ecological
15	protected areas	management	climate change	methods	undirected	10.1111/j.1461-0248.2011.01610.x	ecological
15	protected areas	management	conservation planning	methods	undirected	10.1111/j.1461-0248.2011.01610.x	ecological
15	protected areas	management	gap analysis	methods	undirected	10.1111/j.1461-0248.2011.01610.x	ecological
16	coastal defence	management	coastal management	management	undirected	10.1111/1475-4959.00004	social and policies
16	coastal defence	management	habitats directive	management	undirected	10.1111/1475-4959.00004	social and policies
16	coastal defence	management	natura 2000	management	undirected	10.1111/1475-4959.00004	social and policies
16	coastal defence	management	sea-level rise	management	undirected	10.1111/1475-4959.00004	social and policies
16	coastal management	management	habitats directive	management	undirected	10.1111/1475-4959.00004	social and policies
16	coastal management	management	natura 2000	management	undirected	10.1111/1475-4959.00004	social and policies
16	coastal management	management	sea-level rise	management	undirected	10.1111/1475-4959.00004	social and policies
16	habitats directive	management	natura 2000	management	undirected	10.1111/1475-4959.00004	social and policies
16	habitats directive	management	sea-level rise	management	undirected	10.1111/1475-4959.00004	social and policies
16	sea-level rise	management	natura 2000	management	undirected	10.1111/1475-4959.00004	social and policies
18	multispecies conservation	management	ecosystem	ecosystems/species	undirected	10.1111/j.1654-1103.2011.01266.x	ecological
18	multispecies conservation	management	grasslands	ecosystems/species	undirected	10.1111/j.1654-1103.2011.01266.x	ecological
18	multispecies conservation	management	habitats	ecosystems/species	undirected	10.1111/j.1654-1103.2011.01266.x	ecological
18	multispecies conservation	management	random forest	methods	undirected	10.1111/j.1654-1103.2011.01266.x	ecological
18	multispecies conservation	management	sdm	methods	undirected	10.1111/j.1654-1103.2011.01266.x	ecological
18	multispecies conservation	management	vegetation database	methods	undirected	10.1111/j.1654-1103.2011.01266.x	ecological
19	management agencies	management	decision-support system	methods	undirected	10.1016/j.biocon.2008.10.021	social and policies
19	management agencies	management	grounded theory	methods	undirected	10.1016/j.biocon.2008.10.021	social and policies
19	management agencies	management	natura 2000	management	undirected	10.1016/j.biocon.2008.10.021	social and policies
19	management agencies	management	policy assessment	methods	undirected	10.1016/j.biocon.2008.10.021	social and policies
19	management agencies	management	protected areas	management	undirected	10.1016/j.biocon.2008.10.021	social and policies
19	natura 2000	management	decision-support system	methods	undirected	10.1016/j.biocon.2008.10.021	social and policies
19	natura 2000	management	grounded theory	methods	undirected	10.1016/j.biocon.2008.10.021	social and policies
19	natura 2000	management	policy assessment	methods	undirected	10.1016/j.biocon.2008.10.021	social and policies
19	natura 2000	management	protected areas	management	undirected	10.1016/j.biocon.2008.10.021	social and policies
19	protected areas	management	decision-support system	methods	undirected	10.1016/j.biocon.2008.10.021	social and policies
19	protected areas	management	grounded theory	methods	undirected	10.1016/j.biocon.2008.10.021	social and policies
19	protected areas	management	policy assessment	methods	undirected	10.1016/j.biocon.2008.10.021	social and policies
20	herbicides	management	birds	ecosystems/species	undirected	10.1016/j.scitotenv.2008.09.052	ecological
20	herbicides	management	probabilistic risk assessment	methods	undirected	10.1016/j.scitotenv.2008.09.052	ecological
20	herbicides	management	veterinary medicinal products	ecosystems/species	undirected	10.1016/j.scitotenv.2008.09.052	ecological
21	habitats directive	management	dead wood	ecosystems/species	undirected	10.1007/s10841-010-9283-5	social and policies
21	habitats directive	management	saproxylic beetles	ecosystems/species	undirected	10.1007/s10841-010-9283-5	social and policies
21	habitats directive	management	sci	management	undirected	10.1007/s10841-010-9283-5	social and policies
21	habitats directive	management	urban ecosystems	ecosystems/species	undirected	10.1007/s10841-010-9283-5	social and policies
21	habitats directive	management	visual tree assessment	methods	undirected	10.1007/s10841-010-9283-5	social and policies
21	sci	management	dead wood	ecosystems/species	undirected	10.1007/s10841-010-9283-5	social and policies
21	sci	management	saproxylic beetles	ecosystems/species	undirected	10.1007/s10841-010-9283-5	social and policies
21	sci	management	urban ecosystems	ecosystems/species	undirected	10.1007/s10841-010-9283-5	social and policies
21	sci	management	visual tree assessment	methods	undirected	10.1007/s10841-010-9283-5	social and policies
22	natura 2000	management	connectedness	methods	undirected	10.1016/j.biocon.2012.04.031	ecological
22	natura 2000	management	connectivity	methods	undirected	10.1016/j.biocon.2012.04.031	ecological
22	natura 2000	management	trans-boundary protected areas	management	undirected	10.1016/j.biocon.2012.04.031	ecological
22	trans-boundary protected areas	management	connectedness	methods	undirected	10.1016/j.biocon.2012.04.031	ecological
22	trans-boundary protected areas	management	connectivity	methods	undirected	10.1016/j.biocon.2012.04.031	ecological
24	biodiversity	management	conservation targets	methods	undirected	WOS:000166518700002	ecological
24	biodiversity	management	freshwater sites	ecosystems/species	undirected	WOS:000166518700002	ecological
24	habitats directive	management	biodiversity	management	undirected	WOS:000166518700002	ecological
24	habitats directive	management	conservation targets	methods	undirected	WOS:000166518700002	ecological
24	habitats directive	management	freshwater sites	ecosystems/species	undirected	WOS:000166518700002	ecological
24	habitats directive	management	nature conservation	management	undirected	WOS:000166518700002	ecological
24	habitats directive	management	objectives	management	undirected	WOS:000166518700002	ecological
24	nature conservation	management	biodiversity	management	undirected	WOS:000166518700002	ecological
24	nature conservation	management	conservation targets	methods	undirected	WOS:000166518700002	ecological
24	nature conservation	management	freshwater sites	ecosystems/species	undirected	WOS:000166518700002	ecological
24	nature conservation	management	objectives	management	undirected	WOS:000166518700002	ecological
24	objectives	management	biodiversity	management	undirected	WOS:000166518700002	ecological
24	objectives	management	conservation targets	methods	undirected	WOS:000166518700002	ecological
24	objectives	management	freshwater sites	ecosystems/species	undirected	WOS:000166518700002	ecological
25	local press	management	communicative genres	methods	undirected	10.1080/08941920.2011.606459	social and policies
25	local press	management	national press	management	undirected	10.1080/08941920.2011.606459	social and policies
25	local press	management	social psychology of legal innovation	methods	undirected	10.1080/08941920.2011.606459	social and policies
25	local press	management	social representations	methods	undirected	10.1080/08941920.2011.606459	social and policies
25	national press	management	communicative genres	methods	undirected	10.1080/08941920.2011.606459	social and policies
25	national press	management	social psychology of legal innovation	methods	undirected	10.1080/08941920.2011.606459	social and policies
25	national press	management	social representations	methods	undirected	10.1080/08941920.2011.606459	social and policies
27	natura 2000	management	agroecosystem	ecosystems/species	undirected	10.1016/j.biocon.2011.07.001	ecological
27	natura 2000	management	combined index of biodiversity	methods	undirected	10.1016/j.biocon.2011.07.001	ecological
27	natura 2000	management	gap analysis	methods	undirected	10.1016/j.biocon.2011.07.001	ecological
27	natura 2000	management	landscape representation	methods	undirected	10.1016/j.biocon.2011.07.001	ecological
27	natura 2000	management	least-cost modelling	methods	undirected	10.1016/j.biocon.2011.07.001	ecological
28	natura 2000	management	conservation priorities	methods	undirected	10.1007/s10531-009-9609-3	ecological
28	natura 2000	management	plant endemism	methods	undirected	10.1007/s10531-009-9609-3	ecological
28	natura 2000	management	threatened flora	ecosystems/species	undirected	10.1007/s10531-009-9609-3	ecological
29	biodiversity	management	fcs	methods	undirected	WOS:000293723200002	ecological
29	biodiversity	management	habitats	ecosystems/species	undirected	WOS:000293723200002	ecological
29	biodiversity	management	indicators	methods	undirected	WOS:000293723200002	ecological
29	biodiversity	management	monitoring	methods	undirected	WOS:000293723200002	ecological
29	biodiversity	management	threats	methods	undirected	WOS:000293723200002	ecological
29	forest management	management	biodiversity	management	undirected	WOS:000293723200002	ecological
29	forest management	management	fcs	methods	undirected	WOS:000293723200002	ecological
29	forest management	management	habitats	ecosystems/species	undirected	WOS:000293723200002	ecological
29	forest management	management	indicators	methods	undirected	WOS:000293723200002	ecological
29	forest management	management	monitoring	methods	undirected	WOS:000293723200002	ecological
29	forest management	management	threats	methods	undirected	WOS:000293723200002	ecological
30	natura 2000	management	hybridity	methods	undirected	10.1016/j.jrurstud.2011.09.002	social and policies
30	natura 2000	management	naturalness	methods	undirected	10.1016/j.jrurstud.2011.09.002	social and policies
30	natura 2000	management	nature-society boundaries	methods	undirected	10.1016/j.jrurstud.2011.09.002	social and policies
30	natura 2000	management	protected areas	management	undirected	10.1016/j.jrurstud.2011.09.002	social and policies
30	natura 2000	management	relationality	methods	undirected	10.1016/j.jrurstud.2011.09.002	social and policies
30	natura 2000	management	uncertainty	methods	undirected	10.1016/j.jrurstud.2011.09.002	social and policies
30	nature conservation	management	hybridity	methods	undirected	10.1016/j.jrurstud.2011.09.002	social and policies
30	nature conservation	management	natura 2000	management	undirected	10.1016/j.jrurstud.2011.09.002	social and policies
30	nature conservation	management	naturalness	methods	undirected	10.1016/j.jrurstud.2011.09.002	social and policies
30	nature conservation	management	nature-society boundaries	methods	undirected	10.1016/j.jrurstud.2011.09.002	social and policies
30	nature conservation	management	protected areas	management	undirected	10.1016/j.jrurstud.2011.09.002	social and policies
30	nature conservation	management	relationality	methods	undirected	10.1016/j.jrurstud.2011.09.002	social and policies
30	nature conservation	management	uncertainty	methods	undirected	10.1016/j.jrurstud.2011.09.002	social and policies
30	protected areas	management	hybridity	methods	undirected	10.1016/j.jrurstud.2011.09.002	social and policies
30	protected areas	management	naturalness	methods	undirected	10.1016/j.jrurstud.2011.09.002	social and policies
30	protected areas	management	nature-society boundaries	methods	undirected	10.1016/j.jrurstud.2011.09.002	social and policies
30	protected areas	management	relationality	methods	undirected	10.1016/j.jrurstud.2011.09.002	social and policies
30	protected areas	management	uncertainty	methods	undirected	10.1016/j.jrurstud.2011.09.002	social and policies
31	biodiversity governance	management	deforestation	management	undirected	10.1017/S0376892912000355	ecological
31	biodiversity governance	management	disturbance	methods	undirected	10.1017/S0376892912000355	ecological
31	biodiversity governance	management	forest restitution	management	undirected	10.1017/S0376892912000355	ecological
31	biodiversity governance	management	landsat	methods	undirected	10.1017/S0376892912000355	ecological
31	biodiversity governance	management	natura 2000	management	undirected	10.1017/S0376892912000355	ecological
31	biodiversity governance	management	old-growth forests	ecosystems/species	undirected	10.1017/S0376892912000355	ecological
31	biodiversity governance	management	protected areas	management	undirected	10.1017/S0376892912000355	ecological
31	biodiversity governance	management	remote sensing	methods	undirected	10.1017/S0376892912000355	ecological
31	deforestation	management	disturbance	methods	undirected	10.1017/S0376892912000355	ecological
31	deforestation	management	forest restitution	management	undirected	10.1017/S0376892912000355	ecological
31	deforestation	management	landsat	methods	undirected	10.1017/S0376892912000355	ecological
31	deforestation	management	natura 2000	management	undirected	10.1017/S0376892912000355	ecological
31	deforestation	management	old-growth forests	ecosystems/species	undirected	10.1017/S0376892912000355	ecological
31	deforestation	management	protected areas	management	undirected	10.1017/S0376892912000355	ecological
31	deforestation	management	remote sensing	methods	undirected	10.1017/S0376892912000355	ecological
31	forest restitution	management	disturbance	methods	undirected	10.1017/S0376892912000355	ecological
31	forest restitution	management	landsat	methods	undirected	10.1017/S0376892912000355	ecological
31	forest restitution	management	natura 2000	management	undirected	10.1017/S0376892912000355	ecological
31	forest restitution	management	old-growth forests	ecosystems/species	undirected	10.1017/S0376892912000355	ecological
31	forest restitution	management	protected areas	management	undirected	10.1017/S0376892912000355	ecological
31	forest restitution	management	remote sensing	methods	undirected	10.1017/S0376892912000355	ecological
31	natura 2000	management	disturbance	methods	undirected	10.1017/S0376892912000355	ecological
31	natura 2000	management	landsat	methods	undirected	10.1017/S0376892912000355	ecological
31	natura 2000	management	old-growth forests	ecosystems/species	undirected	10.1017/S0376892912000355	ecological
31	natura 2000	management	protected areas	management	undirected	10.1017/S0376892912000355	ecological
31	natura 2000	management	remote sensing	methods	undirected	10.1017/S0376892912000355	ecological
31	protected areas	management	disturbance	methods	undirected	10.1017/S0376892912000355	ecological
31	protected areas	management	landsat	methods	undirected	10.1017/S0376892912000355	ecological
31	protected areas	management	old-growth forests	ecosystems/species	undirected	10.1017/S0376892912000355	ecological
31	protected areas	management	remote sensing	methods	undirected	10.1017/S0376892912000355	ecological
32	natura 2000	management	gap analysis	methods	undirected	10.1111/j.1523-1739.2007.00831.x	ecological
32	natura 2000	management	irreplaceability	methods	undirected	10.1111/j.1523-1739.2007.00831.x	ecological
32	natura 2000	management	iucn red list	management	undirected	10.1111/j.1523-1739.2007.00831.x	ecological
32	natura 2000	management	protected areas	management	undirected	10.1111/j.1523-1739.2007.00831.x	ecological
32	protected areas	management	gap analysis	methods	undirected	10.1111/j.1523-1739.2007.00831.x	ecological
32	protected areas	management	irreplaceability	methods	undirected	10.1111/j.1523-1739.2007.00831.x	ecological
32	protected areas	management	iucn red list	management	undirected	10.1111/j.1523-1739.2007.00831.x	ecological
33	natura 2000	management	conservation costs	methods	undirected	10.1002/eet.380	social and policies
33	natura 2000	management	economic appraisal	methods	undirected	10.1002/eet.380	social and policies
33	regulatory impacts	management	conservation costs	methods	undirected	10.1002/eet.380	social and policies
33	regulatory impacts	management	economic appraisal	methods	undirected	10.1002/eet.380	social and policies
33	regulatory impacts	management	natura 2000	management	undirected	10.1002/eet.380	social and policies
34	conservation	management	cost-effectiveness	methods	undirected	10.1007/s10531-010-9825-x	ecological
34	conservation	management	exploratory study	methods	undirected	10.1007/s10531-010-9825-x	ecological
34	conservation	management	management	management	undirected	10.1007/s10531-010-9825-x	ecological
34	conservation	management	natura 2000	management	undirected	10.1007/s10531-010-9825-x	ecological
34	management	management	cost-effectiveness	methods	undirected	10.1007/s10531-010-9825-x	ecological
34	management	management	exploratory study	methods	undirected	10.1007/s10531-010-9825-x	ecological
34	management	management	natura 2000	management	undirected	10.1007/s10531-010-9825-x	ecological
34	natura 2000	management	cost-effectiveness	methods	undirected	10.1007/s10531-010-9825-x	ecological
34	natura 2000	management	exploratory study	methods	undirected	10.1007/s10531-010-9825-x	ecological
35	biodiversity	management	birds	ecosystems/species	undirected	10.1002/aqc.2273	ecological
35	biodiversity	management	ecosystem approach	methods	undirected	10.1002/aqc.2273	ecological
35	biodiversity	management	fishing effort	methods	undirected	10.1002/aqc.2273	ecological
35	biodiversity	management	invertebrates	ecosystems/species	undirected	10.1002/aqc.2273	ecological
35	biodiversity	management	mammals	ecosystems/species	undirected	10.1002/aqc.2273	ecological
35	habitats directive	management	biodiversity	management	undirected	10.1002/aqc.2273	ecological
35	habitats directive	management	birds	ecosystems/species	undirected	10.1002/aqc.2273	ecological
35	habitats directive	management	ecosystem approach	methods	undirected	10.1002/aqc.2273	ecological
35	habitats directive	management	fishing effort	methods	undirected	10.1002/aqc.2273	ecological
35	habitats directive	management	invertebrates	ecosystems/species	undirected	10.1002/aqc.2273	ecological
35	habitats directive	management	mammals	ecosystems/species	undirected	10.1002/aqc.2273	ecological
35	habitats directive	management	recreation	management	undirected	10.1002/aqc.2273	ecological
35	recreation	management	biodiversity	management	undirected	10.1002/aqc.2273	ecological
35	recreation	management	birds	ecosystems/species	undirected	10.1002/aqc.2273	ecological
35	recreation	management	ecosystem approach	methods	undirected	10.1002/aqc.2273	ecological
35	recreation	management	fishing effort	methods	undirected	10.1002/aqc.2273	ecological
35	recreation	management	invertebrates	ecosystems/species	undirected	10.1002/aqc.2273	ecological
35	recreation	management	mammals	ecosystems/species	undirected	10.1002/aqc.2273	ecological
36	protected areas	management	insects	ecosystems/species	undirected	10.1111/j.1752-4598.2011.00175.x	ecological
36	protected areas	management	molluscs	ecosystems/species	undirected	10.1111/j.1752-4598.2011.00175.x	ecological
36	protected areas	management	species representation	methods	undirected	10.1111/j.1752-4598.2011.00175.x	ecological
36	protected areas	management	threatened species	ecosystems/species	undirected	10.1111/j.1752-4598.2011.00175.x	ecological
37	biodiversity	management	conservation planning	methods	undirected	10.1016/j.biocon.2010.11.006	ecological
37	biodiversity	management	socio-economic	methods	undirected	10.1016/j.biocon.2010.11.006	ecological
37	biodiversity	management	wind exposure	methods	undirected	10.1016/j.biocon.2010.11.006	ecological
37	mpa	management	biodiversity	management	undirected	10.1016/j.biocon.2010.11.006	ecological
37	mpa	management	conservation planning	methods	undirected	10.1016/j.biocon.2010.11.006	ecological
37	mpa	management	socio-economic	methods	undirected	10.1016/j.biocon.2010.11.006	ecological
37	mpa	management	wind exposure	methods	undirected	10.1016/j.biocon.2010.11.006	ecological
38	conservation policy	management	environmental management	management	undirected	10.1016/j.ecolecon.2009.12.006	social and policies
38	conservation policy	management	natural capital	methods	undirected	10.1016/j.ecolecon.2009.12.006	social and policies
38	environmental management	management	natural capital	methods	undirected	10.1016/j.ecolecon.2009.12.006	social and policies
39	nature conservation	management	ecological significance of landscapes	methods	undirected	10.2478/s13533-012-0120-0	ecological
39	nature conservation	management	landscape metrics	methods	undirected	10.2478/s13533-012-0120-0	ecological
39	nature conservation	management	landscape pattern	methods	undirected	10.2478/s13533-012-0120-0	ecological
39	nature conservation	management	quantification and interpretation of landscape metrics	methods	undirected	10.2478/s13533-012-0120-0	ecological
40	national responsibility	management	distribution range	methods	undirected	10.1007/s10531-008-9439-8	ecological
40	national responsibility	management	evaluation methods	methods	undirected	10.1007/s10531-008-9439-8	ecological
40	national responsibility	management	international importance	management	undirected	10.1007/s10531-008-9439-8	ecological
40	national responsibility	management	species conservation	management	undirected	10.1007/s10531-008-9439-8	ecological
40	species conservation	management	international importance	management	undirected	10.1007/s10531-008-9439-8	ecological
42	biodiversity conflict	management	natura 2000	management	undirected	10.1016/j.biocon.2012.08.018	social and policies
42	biodiversity conflict	management	public participation	management	undirected	10.1016/j.biocon.2012.08.018	social and policies
42	biodiversity conflict	management	sci	management	undirected	10.1016/j.biocon.2012.08.018	social and policies
42	biodiversity conflict	management	stakeholder participation	methods	undirected	10.1016/j.biocon.2012.08.018	social and policies
42	natura 2000	management	sci	management	undirected	10.1016/j.biocon.2012.08.018	social and policies
42	public participation	management	natura 2000	management	undirected	10.1016/j.biocon.2012.08.018	social and policies
42	public participation	management	sci	management	undirected	10.1016/j.biocon.2012.08.018	social and policies
42	public participation	management	stakeholder participation	methods	undirected	10.1016/j.biocon.2012.08.018	social and policies
43	habitats directive	management	connectivity	methods	undirected	10.1111/j.1365-2664.2010.01892.x	ecological
43	habitats directive	management	essential fish habitats	ecosystems/species	undirected	10.1111/j.1365-2664.2010.01892.x	ecological
43	habitats directive	management	habitat modelling	methods	undirected	10.1111/j.1365-2664.2010.01892.x	ecological
43	habitats directive	management	mpa	management	undirected	10.1111/j.1365-2664.2010.01892.x	ecological
43	habitats directive	management	natura 2000	management	undirected	10.1111/j.1365-2664.2010.01892.x	ecological
43	mpa	management	connectivity	methods	undirected	10.1111/j.1365-2664.2010.01892.x	ecological
43	mpa	management	essential fish habitats	ecosystems/species	undirected	10.1111/j.1365-2664.2010.01892.x	ecological
43	mpa	management	habitat modelling	methods	undirected	10.1111/j.1365-2664.2010.01892.x	ecological
43	mpa	management	natura 2000	management	undirected	10.1111/j.1365-2664.2010.01892.x	ecological
43	natura 2000	management	connectivity	methods	undirected	10.1111/j.1365-2664.2010.01892.x	ecological
43	natura 2000	management	essential fish habitats	ecosystems/species	undirected	10.1111/j.1365-2664.2010.01892.x	ecological
43	natura 2000	management	habitat modelling	methods	undirected	10.1111/j.1365-2664.2010.01892.x	ecological
44	corridors	management	connectivity	methods	undirected	10.1111/j.1523-1739.2007.00828.x	ecological
44	corridors	management	core areas	methods	undirected	10.1111/j.1523-1739.2007.00828.x	ecological
44	corridors	management	ecological networks	management	undirected	10.1111/j.1523-1739.2007.00828.x	ecological
44	corridors	management	focal species	methods	undirected	10.1111/j.1523-1739.2007.00828.x	ecological
44	ecological networks	management	connectivity	methods	undirected	10.1111/j.1523-1739.2007.00828.x	ecological
44	ecological networks	management	core areas	methods	undirected	10.1111/j.1523-1739.2007.00828.x	ecological
44	ecological networks	management	focal species	methods	undirected	10.1111/j.1523-1739.2007.00828.x	ecological
45	biodiversity	management	ecosystem services	methods	undirected	10.1007/s10750-007-9225-8	ecological
45	biodiversity	management	temporary ponds	ecosystems/species	undirected	10.1007/s10750-007-9225-8	ecological
45	biodiversity	management	wetlands	ecosystems/species	undirected	10.1007/s10750-007-9225-8	ecological
45	conservation	management	biodiversity	management	undirected	10.1007/s10750-007-9225-8	ecological
45	conservation	management	ecosystem services	methods	undirected	10.1007/s10750-007-9225-8	ecological
45	conservation	management	temporary ponds	ecosystems/species	undirected	10.1007/s10750-007-9225-8	ecological
45	conservation	management	water policy	management	undirected	10.1007/s10750-007-9225-8	ecological
45	conservation	management	wetlands	ecosystems/species	undirected	10.1007/s10750-007-9225-8	ecological
[truncated: 7,280 more rows]

## Sheet: Studies_vs_area
Country	N2Ksites	N2Kmarine	AreaN2KTerr	AreaN2KMar	PercTerr	RNMStud	Tstud	EU	RNMStud_2	TotStud_2
AT	218	0	12528.4	0	14.96	5	31	EU15	7	70
BE	458	7	3890.83	1261.91	12.75	4	30	EU15	13	77
BG	336	23	38083.6	925.81	34.34	1	24	EU27	3	48
CY	61	9	49293.1	132.34	28.37	1	27	EU25	4	56
CZ	1116	0	11061.5	0	14.03	5	31	EU25	6	66
DE	5264	79	55243.8	25508.7	8.43	10	36	EU15	32	109
DK	350	130	3652.11	19011.7	15.47	3	29	EU15	13	73
EE	568	50	8061.1	6908.11	17.82	2	28	EU25	4	57
ES	1805	211	137664	10193.2	27.27	26	52	EU15	67	138
FI	1839	168	48760.7	7224.64	14.42	8	34	EU15	13	72
FR	1754	211	68957.9	41736.4	12.56	8	34	EU15	18	90
EL	419	137	36009.7	6908.11	27.29	18	44	EU15	45	102
HU	525	0	19949.7	0	21.44	3	29	EU25	3	60
IE	587	211	9258.66	6828.83	13.71	2	28	EU15	21	80
IT	2576	282	57357.3	6308.12	19.03	29	55	EU15	77	150
LT	488	8	7883.19	680.86	12.07	1	27	EU25	2	54
LU	60	0	469.45	0	18.08	0	26	EU15	0	53
LV	324	7	7442	1725.21	11.52	0	26	EU25	0	53
MT	39	17	1682.94	191.16	13.35	1	27	EU25	0	53
NL	203	14	5739	11644.5	13.82	7	33	EU15	11	79
PL	983	17	61210.3	7248.19	19.58	9	35	EU25	16	78
PT	149	51	19217.4	2407.8	20.89	11	37	EU15	26	95
RO	531	9	53941.5	1720.82	22.63	8	31	EU27	10	60
SE	4071	444	57509.5	9210.55	13.86	6	32	EU15	4	68
SI	286	8	7200.34	3.09	35.52	3	29	EU25	4	62
SK	514	0	57509.5	0	29.58	5	31	EU25	4	64
UK	920	267	20934.8	73893.6	8.55	21	47	EU15	46	112
